# Supplementary material for: The effect of solvation in torquoselectivity: ring opening of monosubstituted cyclobutenes
Source: Royal Society of Chemistry journal article supplement (doi:10.1039/d0ob01229g), 2020-01-01
Supplement: d0ob01229g1.pdf [file d0ob01229g1.pdf]

**Supporting Information:**

**The Effect of Solvation in Torquoselectivity:  
Ring Opening of Monosubstituted Cyclobutenes**

Kayvan Saadat,<sup>†</sup> Roberto Villar López,<sup>‡</sup> Ali Shiri,<sup>†</sup> Olalla Nieto Faza,<sup>‡</sup> and  
Carlos Silva López<sup>\*,‡</sup>

*<sup>†</sup>Department of Chemistry. Faculty of Science. Ferdowsi University of Mashhad.*

*91775-1436, Azadi Int., Mashhad, Iran*

*<sup>‡</sup>Departamento de Química Orgánica. Universidade de Vigo. Campus Lagoas-Marcosende  
and CITACA, Agri-Food Research and Transfer Cluster, Campus da Auga, 32004-Ourense,  
Spain.*

E-mail: carlos.silva@uvigo.es

Phone: +34 986813268

# Contents

|                                            |      |
|--------------------------------------------|------|
| Energy components of solvation             | S-3  |
| Cartesian coordinates of energy minima     | S-4  |
| Cartesian coordinates of transition states | S-89 |

# Energy components of solvation

|              | Cavitation |        |         |        | Dispersion |        |         |        | Repulsion |        |         |        |
|--------------|------------|--------|---------|--------|------------|--------|---------|--------|-----------|--------|---------|--------|
|              | OMe-out    | OMe-in | NH2-out | NH2-in | OMe-out    | OMe-in | NH2-out | NH2-in | OMe-out   | OMe-in | NH2-out | NH2-in |
| n-Hexane*    | 12.87      | 12.75  | 11.22   | 11.17  | -10.23     | -10.16 | -9.05   | -8.95  | 0.67      | 0.66   | 0.6     | 0.59   |
| DCM          | 14.17      | 14.03  | 12.34   | 12.29  | -9.94      | -9.87  | -8.81   | -8.7   | 0.66      | 0.65   | 0.59    | 0.58   |
| Acetone      | 13.6       | 13.47  | 11.84   | 11.8   | -9.57      | -9.5   | -8.46   | -8.38  | 0.64      | 0.63   | 0.57    | 0.56   |
| Acetonitrile | 16.31      | 16.15  | 14.21   | 14.15  | -8.57      | -8.5   | -7.57   | -7.5   | 0.57      | 0.56   | 0.51    | 0.5    |
| DMSO         | 18.08      | 17.9   | 15.74   | 15.68  | -12.18     | -12.09 | -10.77  | -10.67 | 0.84      | 0.82   | 0.75    | 0.73   |
| Water        | 18.78      | 18.59  | 16.35   | 16.28  | -11.92     | -11.82 | -10.52  | -10.44 | 0.85      | 0.83   | 0.76    | 0.74   |

  

|              | (Unpolarized solute)-solvent |        |         |        | (Polarized solute)-solvent |        |         |        | Solute polarization |        |         |        |
|--------------|------------------------------|--------|---------|--------|----------------------------|--------|---------|--------|---------------------|--------|---------|--------|
|              | OMe-out                      | OMe-in | NH2-out | NH2-in | OMe-out                    | OMe-in | NH2-out | NH2-in | OMe-out             | OMe-in | NH2-out | NH2-in |
| n-Hexane     | -0.8                         | -0.75  | -1.13   | -1.03  | -0.88                      | -0.81  | -1.24   | -1.13  | 0.04                | 0.03   | 0.06    | 0.05   |
| DCM          | -1.8                         | -1.77  | -2.54   | -2.5   | -2.25                      | -2.2   | -3.13   | -3.18  | 0.25                | 0.23   | 0.32    | 0.37   |
| Acetone      | -1.99                        | -1.98  | -2.81   | -2.81  | -2.57                      | -2.54  | -3.54   | -3.71  | 0.32                | 0.30   | 0.40    | 0.49   |
| Acetonitrile | -2.06                        | -2.05  | -2.9    | -2.92  | -2.68                      | -2.66  | -3.68   | -3.9   | 0.34                | 0.33   | 0.43    | 0.54   |
| DMSO         | -2.08                        | -2.08  | -2.93   | -2.95  | -2.72                      | -2.7   | -3.73   | -3.97  | 0.35                | 0.34   | 0.44    | 0.56   |
| Water        | -2.11                        | -2.11  | -2.97   | -3     | -2.77                      | -2.76  | -3.8    | -4.05  | 0.36                | 0.36   | 0.45    | 0.58   |

  

|              | DeltaG  |        |         |        | Total non-electrostatic |        |         |        | Total electrostatic |        |         |        |
|--------------|---------|--------|---------|--------|-------------------------|--------|---------|--------|---------------------|--------|---------|--------|
|              | OMe-out | OMe-in | NH2-out | NH2-in | OMe-out                 | OMe-in | NH2-out | NH2-in | OMe-out             | OMe-in | NH2-out | NH2-in |
| n-Hexane     | 2.48    | 2.47   | 1.58    | 1.73   | 3.31                    | 3.25   | 2.77    | 2.81   | -0.84               | -0.78  | -1.19   | -1.08  |
| DCM          | 2.88    | 2.84   | 1.32    | 1.35   | 4.89                    | 4.81   | 4.12    | 4.16   | -2.01               | -1.97  | -2.81   | -2.81  |
| Acetone      | 2.41    | 2.36   | 0.82    | 0.77   | 4.67                    | 4.6    | 3.96    | 3.98   | -2.25               | -2.23  | -3.14   | -3.21  |
| Acetonitrile | 5.98    | 5.89   | 3.9     | 3.8    | 8.32                    | 8.22   | 7.15    | 7.16   | -2.34               | -2.33  | -3.25   | -3.36  |
| DMSO         | 4.37    | 4.27   | 2.43    | 2.34   | 6.73                    | 6.64   | 5.72    | 5.75   | -2.37               | -2.36  | -3.29   | -3.41  |
| Water        | 5.3     | 5.2    | 3.25    | 3.11   | 7.7                     | 7.61   | 6.59    | 6.58   | -2.41               | -2.4   | -3.34   | -3.47  |

# Energy minima

3-CF3-Acetone

SCF Energy: -493.055574966

ZPE-corrected Energy: -492.962673

$\Delta U$ : -492.955782

$\Delta H$ : -492.954838

$\Delta G$ : -492.994279

Num. Imaginary Frequencies: 0

|   |           |           |           |
|---|-----------|-----------|-----------|
| C | -0.449382 | -0.006135 | -0.670389 |
| C | -1.456750 | 1.054149  | -0.130165 |
| C | -2.305021 | -0.134455 | 0.261306  |
| C | -1.439327 | -1.041563 | -0.184367 |
| H | -0.280398 | 0.027463  | -1.746486 |
| H | -1.868928 | 1.703531  | -0.900123 |
| H | -1.081735 | 1.661023  | 0.693140  |
| H | -3.279508 | -0.201767 | 0.724017  |
| H | -1.422607 | -2.121258 | -0.222020 |
| C | 0.894863  | -0.008204 | -0.003335 |
| F | 1.620478  | -1.083463 | -0.351894 |
| F | 0.813442  | -0.017628 | 1.335068  |
| F | 1.617954  | 1.073119  | -0.337266 |

3-CF3-Acetonitrile

SCF Energy: -493.055688843

ZPE-corrected Energy: -492.962800

$\Delta U$ : -492.955909

$\Delta H$ : -492.954965

$\Delta G$ : -492.994406

Num. Imaginary Frequencies: 0

|   |           |           |           |
|---|-----------|-----------|-----------|
| C | -0.449450 | -0.006116 | -0.670507 |
| C | -1.456804 | 1.054148  | -0.130190 |
| C | -2.304965 | -0.134467 | 0.261477  |
| C | -1.439306 | -1.041597 | -0.184327 |
| H | -0.280552 | 0.027475  | -1.746599 |
| H | -1.869145 | 1.703265  | -0.900259 |
| H | -1.081862 | 1.661290  | 0.692956  |
| H | -3.279522 | -0.201724 | 0.724059  |
| H | -1.422722 | -2.121288 | -0.222370 |
| C | 0.894710  | -0.008181 | -0.003510 |
| F | 1.620637  | -1.083355 | -0.351936 |
| F | 0.813428  | -0.017792 | 1.335054  |
| F | 1.618013  | 1.073175  | -0.337057 |

3-CF3-Dichloromethane

SCF Energy: -493.055246758

ZPE-corrected Energy: -492.962307

$\Delta U$ : -492.955418

$\Delta H$ : -492.954474

$\Delta G$ : -492.993913

Num. Imaginary Frequencies: 0

|   |           |           |           |
|---|-----------|-----------|-----------|
| C | -0.449180 | -0.006181 | -0.670070 |
| C | -1.456591 | 1.054151  | -0.130111 |
| C | -2.305151 | -0.134426 | 0.260841  |
| C | -1.439360 | -1.041463 | -0.184483 |
| H | -0.279957 | 0.027431  | -1.746177 |
| H | -1.868340 | 1.704252  | -0.899763 |
| H | -1.081355 | 1.660299  | 0.693615  |
| H | -3.279446 | -0.201902 | 0.723910  |
| H | -1.422267 | -2.121167 | -0.221075 |
| C | 0.895308  | -0.008266 | -0.002853 |
| F | 1.619969  | -1.083831 | -0.351672 |
| F | 0.813437  | -0.017045 | 1.335107  |
| F | 1.617840  | 1.072898  | -0.337931 |

3-CF3-DMSO

SCF Energy: -493.055726050

ZPE-corrected Energy: -492.962842

$\Delta U$ : -492.955950

$\Delta H$ : -492.955006

$\Delta G$ : -492.994448

Num. Imaginary Frequencies: 0

|   |           |           |           |
|---|-----------|-----------|-----------|
| C | -0.449472 | -0.006109 | -0.670546 |
| C | -1.456821 | 1.054148  | -0.130198 |
| C | -2.304946 | -0.134471 | 0.261534  |
| C | -1.439299 | -1.041608 | -0.184314 |
| H | -0.280603 | 0.027479  | -1.746637 |
| H | -1.869218 | 1.703176  | -0.900305 |
| H | -1.081904 | 1.661380  | 0.692894  |
| H | -3.279525 | -0.201710 | 0.724073  |
| H | -1.422759 | -2.121298 | -0.222487 |
| C | 0.894660  | -0.008173 | -0.003567 |
| F | 1.620687  | -1.083323 | -0.351945 |
| F | 0.813421  | -0.017841 | 1.335050  |
| F | 1.618034  | 1.073191  | -0.336992 |

3-CF3-Gas

SCF Energy: -493.052260465

ZPE-corrected Energy: -492.959028

$\Delta U$ : -492.952153

$\Delta H$ : -492.951209

$\Delta G$ : -492.990627

Num. Imaginary Frequencies: 0

|   |           |           |           |
|---|-----------|-----------|-----------|
| C | -0.446971 | -0.006322 | -0.668512 |
| C | -1.454687 | 1.054150  | -0.130433 |
| C | -2.304713 | -0.134294 | 0.258015  |
| C | -1.438451 | -1.040501 | -0.185851 |
| H | -0.276094 | 0.027260  | -1.744601 |
| H | -1.864744 | 1.708547  | -0.897896 |
| H | -1.076690 | 1.655679  | 0.695323  |
| H | -3.277420 | -0.203369 | 0.724107  |
| H | -1.418965 | -2.120207 | -0.215633 |
| C | 0.899427  | -0.008614 | 0.000548  |
| F | 1.613797  | -1.088888 | -0.346175 |
| F | 0.810861  | -0.008545 | 1.335425  |
| F | 1.618262  | 1.069164  | -0.345238 |

3-CF3-n-Hexane

SCF Energy: -493.053555528

ZPE-corrected Energy: -492.960439

$\Delta U$ : -492.953558

$\Delta H$ : -492.952614

$\Delta G$ : -492.992040

Num. Imaginary Frequencies: 0

|   |           |           |           |
|---|-----------|-----------|-----------|
| C | -0.448009 | -0.006297 | -0.668896 |
| C | -1.455634 | 1.054161  | -0.130131 |
| C | -2.305234 | -0.134334 | 0.258964  |
| C | -1.439071 | -1.040930 | -0.185170 |
| H | -0.277767 | 0.027317  | -1.745013 |
| H | -1.865990 | 1.707093  | -0.898463 |
| H | -1.079010 | 1.657366  | 0.695065  |
| H | -3.278627 | -0.202718 | 0.723729  |
| H | -1.420428 | -2.120644 | -0.217413 |
| C | 0.897641  | -0.008493 | -0.000748 |
| F | 1.616677  | -1.086477 | -0.349096 |
| F | 0.812495  | -0.012648 | 1.335305  |
| F | 1.617902  | 1.071008  | -0.341989 |

3-CF3-Water

SCF Energy: -493.055774522

ZPE-corrected Energy: -492.962896

$\Delta U$ : -492.956004

$\Delta H$ : -492.955060

$\Delta G$ : -492.994502

Num. Imaginary Frequencies: 0

|   |           |           |           |
|---|-----------|-----------|-----------|
| C | -0.449500 | -0.006100 | -0.670598 |
| C | -1.456844 | 1.054148  | -0.130210 |
| C | -2.304920 | -0.134476 | 0.261609  |
| C | -1.439288 | -1.041622 | -0.184298 |
| H | -0.280669 | 0.027485  | -1.746687 |
| H | -1.869314 | 1.703059  | -0.900365 |
| H | -1.081957 | 1.661498  | 0.692811  |
| H | -3.279529 | -0.201693 | 0.724092  |
| H | -1.422807 | -2.121311 | -0.222641 |
| C | 0.894594  | -0.008162 | -0.003643 |
| F | 1.620750  | -1.083282 | -0.351954 |
| F | 0.813411  | -0.017900 | 1.335044  |
| F | 1.618064  | 1.073209  | -0.336909 |

3-CHO-Acetone

SCF Energy: -269.284767039

ZPE-corrected Energy: -269.187989

$\Delta U$ : -269.182331

$\Delta H$ : -269.181387

$\Delta G$ : -269.217370

Num. Imaginary Frequencies: 0

|   |           |           |           |
|---|-----------|-----------|-----------|
| C | 0.072202  | 0.002851  | -0.520098 |
| C | -1.012461 | 1.042949  | -0.071011 |
| C | -1.855957 | -0.152045 | 0.294131  |
| C | -0.955667 | -1.042277 | -0.116914 |
| H | 0.369904  | 0.035949  | -1.566510 |
| H | -1.381929 | 1.647553  | -0.897553 |
| H | -0.717613 | 1.699546  | 0.748743  |
| H | -2.842507 | -0.236567 | 0.728480  |
| H | -0.919253 | -2.122129 | -0.150547 |
| C | 1.272863  | 0.011474  | 0.370282  |
| O | 2.415929  | -0.032032 | -0.006584 |
| H | 1.038076  | 0.054197  | 1.451715  |

3-CHO-Acetonitrile

SCF Energy: -269.284968628

ZPE-corrected Energy: -269.188193

$\Delta U$ : -269.182536

$\Delta H$ : -269.181591

$\Delta G$ : -269.217574

Num. Imaginary Frequencies: 0

|   |           |           |           |
|---|-----------|-----------|-----------|
| C | 0.072301  | 0.002313  | -0.519956 |
| C | -1.011941 | 1.043114  | -0.070994 |
| C | -1.856095 | -0.151448 | 0.294001  |
| C | -0.956180 | -1.042220 | -0.116850 |
| H | 0.369955  | 0.035390  | -1.566385 |
| H | -1.380828 | 1.647708  | -0.897783 |
| H | -0.716902 | 1.699621  | 0.748705  |
| H | -2.842782 | -0.235371 | 0.728137  |
| H | -0.920266 | -2.122090 | -0.150469 |
| C | 1.272710  | 0.010810  | 0.370382  |
| O | 2.415981  | -0.031676 | -0.006688 |
| H | 1.038204  | 0.052736  | 1.451794  |



3-CHO-Dichloromethane  
SCF Energy: -269.284184456  
ZPE-corrected Energy: -269.187396  
 $\Delta U$ : -269.181739  
 $\Delta H$ : -269.180795  
 $\Delta G$ : -269.216777

Num. Imaginary Frequencies: 0

|   |           |           |           |
|---|-----------|-----------|-----------|
| C | 0.072006  | 0.002816  | -0.520122 |
| C | -1.012536 | 1.042948  | -0.071190 |
| C | -1.855899 | -0.152077 | 0.294459  |
| C | -0.955784 | -1.042195 | -0.117043 |
| H | 0.370117  | 0.035829  | -1.566411 |
| H | -1.382525 | 1.647514  | -0.897564 |
| H | -0.717466 | 1.699859  | 0.748313  |
| H | -2.842318 | -0.236779 | 0.729079  |
| H | -0.919847 | -2.122063 | -0.150862 |
| C | 1.273419  | 0.011525  | 0.370249  |
| O | 2.415832  | -0.032118 | -0.006572 |
| H | 1.038152  | 0.054485  | 1.451895  |

### 3-CHO-DMSO

SCF Energy: -269.285034386  
ZPE-corrected Energy: -269.188260  
 $\Delta U$ : -269.182603  
 $\Delta H$ : -269.181658  
 $\Delta G$ : -269.217641

Num. Imaginary Frequencies: 0

|   |           |           |           |
|---|-----------|-----------|-----------|
| C | 0.072325  | 0.002305  | -0.519946 |
| C | -1.011922 | 1.043116  | -0.070975 |
| C | -1.856108 | -0.151432 | 0.293958  |
| C | -0.956180 | -1.042228 | -0.116832 |
| H | 0.369935  | 0.035387  | -1.566389 |
| H | -1.380736 | 1.647722  | -0.897785 |
| H | -0.716903 | 1.699580  | 0.748756  |
| H | -2.842813 | -0.235321 | 0.728058  |
| H | -0.920222 | -2.122096 | -0.150423 |
| C | 1.272650  | 0.010794  | 0.370391  |
| O | 2.415992  | -0.031662 | -0.006696 |
| H | 1.038203  | 0.052686  | 1.451780  |

### 3-CHO-Gas

SCF Energy: -269.278904447  
ZPE-corrected Energy: -269.182058  
 $\Delta U$ : -269.176409  
 $\Delta H$ : -269.175465  
 $\Delta G$ : -269.211418

Num. Imaginary Frequencies: 0

|   |           |           |           |
|---|-----------|-----------|-----------|
| C | 0.070670  | 0.001761  | -0.518252 |
| C | -1.012905 | 1.042909  | -0.072866 |
| C | -1.856865 | -0.151609 | 0.295143  |
| C | -0.957620 | -1.041397 | -0.117457 |
| H | 0.373176  | 0.033419  | -1.563314 |
| H | -1.385222 | 1.648418  | -0.897836 |
| H | -0.716305 | 1.700420  | 0.746082  |
| H | -2.842867 | -0.236948 | 0.730625  |
| H | -0.925862 | -2.121476 | -0.150540 |
| C | 1.279389  | 0.011900  | 0.371451  |
| O | 2.414943  | -0.032917 | -0.008532 |
| H | 1.041520  | 0.058125  | 1.455127  |

### 3-CHO-n-Hexane

SCF Energy: -269.281173974  
ZPE-corrected Energy: -269.184347  
 $\Delta U$ : -269.178694  
 $\Delta H$ : -269.177750  
 $\Delta G$ : -269.213719

Num. Imaginary Frequencies: 0

|   |           |           |           |
|---|-----------|-----------|-----------|
| C | 0.071147  | 0.002266  | -0.519442 |
| C | -1.012717 | 1.042950  | -0.072142 |
| C | -1.856207 | -0.151854 | 0.295254  |
| C | -0.956781 | -1.041745 | -0.117391 |
| H | 0.371571  | 0.034568  | -1.565073 |
| H | -1.384386 | 1.647917  | -0.897658 |
| H | -0.716583 | 1.700533  | 0.746752  |
| H | -2.842256 | -0.237012 | 0.730651  |
| H | -0.923321 | -2.121725 | -0.151170 |
| C | 1.276661  | 0.011682  | 0.370642  |
| O | 2.415347  | -0.032545 | -0.007309 |
| H | 1.039585  | 0.056287  | 1.453435  |

3-CHO-Water

SCF Energy: -269.285119988

ZPE-corrected Energy: -269.188347

$\Delta U$ : -269.182690

$\Delta H$ : -269.181745

$\Delta G$ : -269.217728

Num. Imaginary Frequencies: 0

|   |           |           |           |
|---|-----------|-----------|-----------|
| C | 0.072356  | 0.002293  | -0.519932 |
| C | -1.011895 | 1.043120  | -0.070951 |
| C | -1.856125 | -0.151408 | 0.293899  |
| C | -0.956180 | -1.042237 | -0.116808 |
| H | 0.369910  | 0.035380  | -1.566392 |
| H | -1.380612 | 1.647741  | -0.897787 |
| H | -0.716901 | 1.699524  | 0.748823  |
| H | -2.842855 | -0.235251 | 0.727952  |
| H | -0.920168 | -2.122105 | -0.150361 |
| C | 1.272573  | 0.010772  | 0.370403  |
| O | 2.416007  | -0.031642 | -0.006708 |
| H | 1.038204  | 0.052619  | 1.451762  |

3-COMe-Acetone

SCF Energy: -308.603992282

ZPE-corrected Energy: -308.479070

$\Delta U$ : -308.472010

$\Delta H$ : -308.471065

$\Delta G$ : -308.510375

Num. Imaginary Frequencies: 0

|   |           |           |           |
|---|-----------|-----------|-----------|
| C | 0.245279  | -0.602132 | -0.415362 |
| C | 1.194761  | -0.702045 | 0.836434  |
| C | 2.051118  | 0.317137  | 0.126604  |
| C | 1.250970  | 0.405500  | -0.933356 |
| H | 0.161839  | -1.531177 | -0.977234 |
| H | 1.632457  | -1.690598 | 0.965258  |
| H | 0.749353  | -0.383733 | 1.779624  |
| H | 2.984816  | 0.790260  | 0.398158  |
| H | 1.280030  | 0.976002  | -1.851724 |
| C | -1.141597 | -0.115283 | -0.076280 |
| O | -2.098676 | -0.851672 | -0.173440 |
| C | -1.282544 | 1.306534  | 0.395385  |
| H | -0.477577 | 1.576936  | 1.078342  |
| H | -1.198274 | 1.967025  | -0.470342 |
| H | -2.251163 | 1.450396  | 0.864886  |

3-COMe-Acetonitrile

SCF Energy: -308.604226359

ZPE-corrected Energy: -308.479313

$\Delta U$ : -308.472253

$\Delta H$ : -308.471308

$\Delta G$ : -308.510621

Num. Imaginary Frequencies: 0

|   |           |           |           |
|---|-----------|-----------|-----------|
| C | 0.245239  | -0.601635 | -0.415967 |
| C | 1.194617  | -0.702782 | 0.835908  |
| C | 2.051167  | 0.316855  | 0.127006  |
| C | 1.251065  | 0.406399  | -0.932910 |
| H | 0.161951  | -1.530187 | -0.978701 |
| H | 1.632059  | -1.691547 | 0.963938  |
| H | 0.749220  | -0.385020 | 1.779271  |
| H | 2.984863  | 0.789615  | 0.399182  |
| H | 1.279928  | 0.977904  | -1.850647 |
| C | -1.141442 | -0.115094 | -0.076381 |
| O | -2.098559 | -0.851833 | -0.173534 |
| C | -1.282677 | 1.306316  | 0.395787  |
| H | -0.477708 | 1.576436  | 1.078854  |
| H | -1.198404 | 1.967085  | -0.469745 |
| H | -2.251250 | 1.450019  | 0.865463  |

3-COMe-Dichloromethane

SCF Energy: -308.603319126

ZPE-corrected Energy: -308.478372

$\Delta U$ : -308.471313

$\Delta H$ : -308.470369

$\Delta G$ : -308.509672

Num. Imaginary Frequencies: 0

|   |           |           |           |
|---|-----------|-----------|-----------|
| C | 0.245455  | -0.603497 | -0.413552 |
| C | 1.195244  | -0.699777 | 0.838021  |
| C | 2.051062  | 0.318033  | 0.125469  |
| C | 1.250867  | 0.402815  | -0.934683 |
| H | 0.161588  | -1.534039 | -0.972817 |
| H | 1.633643  | -1.687713 | 0.969264  |
| H | 0.749769  | -0.379745 | 1.780644  |
| H | 2.984748  | 0.792236  | 0.395238  |
| H | 1.280527  | 0.970320  | -1.854919 |
| C | -1.142065 | -0.115821 | -0.075993 |
| O | -2.098914 | -0.851360 | -0.173197 |
| C | -1.282502 | 1.307133  | 0.394128  |
| H | -0.477736 | 1.578441  | 1.076996  |
| H | -1.198184 | 1.966894  | -0.472137 |
| H | -2.251408 | 1.451172  | 0.862966  |

3-COMe-DMSO

SCF Energy: -308.604302880

ZPE-corrected Energy: -308.479393

$\Delta U$ : -308.472332

$\Delta H$ : -308.471388

$\Delta G$ : -308.510702

Num. Imaginary Frequencies: 0

|   |           |           |           |
|---|-----------|-----------|-----------|
| C | 0.245221  | -0.601511 | -0.416140 |
| C | 1.194564  | -0.702988 | 0.835767  |
| C | 2.051165  | 0.316774  | 0.127119  |
| C | 1.251085  | 0.406635  | -0.932793 |
| H | 0.161968  | -1.529927 | -0.979109 |
| H | 1.631944  | -1.691810 | 0.963561  |
| H | 0.749172  | -0.385385 | 1.779179  |
| H | 2.984844  | 0.789456  | 0.399487  |
| H | 1.279884  | 0.978410  | -1.850360 |
| C | -1.141386 | -0.115032 | -0.076406 |
| O | -2.098534 | -0.851866 | -0.173549 |
| C | -1.282684 | 1.306261  | 0.395892  |
| H | -0.477676 | 1.576316  | 1.078938  |
| H | -1.198448 | 1.967090  | -0.469602 |
| H | -2.251213 | 1.449946  | 0.865668  |

3-COMe-Gas

SCF Energy: -308.597414192

ZPE-corrected Energy: -308.472322

$\Delta U$ : -308.465246

$\Delta H$ : -308.464302

$\Delta G$ : -308.503668

Num. Imaginary Frequencies: 0

|   |           |           |           |
|---|-----------|-----------|-----------|
| C | 0.247587  | -0.611844 | -0.400426 |
| C | 1.199553  | -0.683044 | 0.849094  |
| C | 2.051883  | 0.324495  | 0.117414  |
| C | 1.251138  | 0.384456  | -0.943514 |
| H | 0.159914  | -1.552616 | -0.941489 |
| H | 1.642948  | -1.666387 | 0.998434  |
| H | 0.753827  | -0.349356 | 1.787120  |
| H | 2.985125  | 0.806526  | 0.374761  |
| H | 1.284489  | 0.932117  | -1.875765 |
| C | -1.146013 | -0.120110 | -0.074350 |
| O | -2.098772 | -0.851352 | -0.171746 |
| C | -1.285894 | 1.311077  | 0.384946  |
| H | -0.480431 | 1.593507  | 1.062749  |
| H | -1.210193 | 1.966241  | -0.485444 |
| H | -2.255023 | 1.450603  | 0.854615  |

3-COMe-n-Hexane

SCF Energy: -308.599914622

ZPE-corrected Energy: -308.474877

$\Delta U$ : -308.467810

$\Delta H$ : -308.466866

$\Delta G$ : -308.506198

Num. Imaginary Frequencies: 0

|   |           |           |           |
|---|-----------|-----------|-----------|
| C | 0.246559  | -0.608625 | -0.405784 |
| C | 1.197637  | -0.689966 | 0.844611  |
| C | 2.051407  | 0.321775  | 0.120659  |
| C | 1.250854  | 0.391845  | -0.939998 |
| H | 0.160681  | -1.545313 | -0.954225 |
| H | 1.638700  | -1.675281 | 0.986906  |
| H | 0.751842  | -0.361656 | 1.784433  |
| H | 2.985098  | 0.800310  | 0.382816  |
| H | 1.282882  | 0.947500  | -1.867491 |
| C | -1.144328 | -0.118358 | -0.074955 |
| O | -2.099147 | -0.850968 | -0.172379 |
| C | -1.283865 | 1.309541  | 0.388788  |
| H | -0.478606 | 1.586855  | 1.068809  |
| H | -1.204029 | 1.966487  | -0.479934 |
| H | -2.252978 | 1.451567  | 0.857791  |

3-COMe-Water

SCF Energy: -308.604402599

ZPE-corrected Energy: -308.479497

$\Delta U$ : -308.472436

$\Delta H$ : -308.471491

$\Delta G$ : -308.510808

Num. Imaginary Frequencies: 0

|   |           |           |           |
|---|-----------|-----------|-----------|
| C | 0.245198  | -0.601346 | -0.416370 |
| C | 1.194498  | -0.703265 | 0.835575  |
| C | 2.051164  | 0.316664  | 0.127264  |
| C | 1.251103  | 0.406957  | -0.932634 |
| H | 0.161990  | -1.529576 | -0.979659 |
| H | 1.631795  | -1.692163 | 0.963057  |
| H | 0.749117  | -0.385871 | 1.779056  |
| H | 2.984824  | 0.789236  | 0.399879  |
| H | 1.279809  | 0.979103  | -1.849968 |
| C | -1.141312 | -0.114954 | -0.076440 |
| O | -2.098502 | -0.851909 | -0.173570 |
| C | -1.282688 | 1.306186  | 0.396038  |
| H | -0.477642 | 1.576151  | 1.079069  |
| H | -1.198491 | 1.967096  | -0.469402 |
| H | -2.251166 | 1.449845  | 0.865929  |

3-COOH-Acetone

SCF Energy: -344.552754453

ZPE-corrected Energy: -344.450038

$\Delta U$ : -344.443597

$\Delta H$ : -344.442652

$\Delta G$ : -344.481290

Num. Imaginary Frequencies: 0

|   |           |           |           |
|---|-----------|-----------|-----------|
| C | 0.230057  | -0.535160 | -0.440311 |
| C | 1.190092  | -0.749606 | 0.786487  |
| C | 2.071525  | 0.283352  | 0.127973  |
| C | 1.251358  | 0.483820  | -0.899509 |
| H | 0.118131  | -1.414954 | -1.069489 |
| H | 1.592268  | -1.759113 | 0.852194  |
| H | 0.763424  | -0.463845 | 1.747216  |
| H | 3.029920  | 0.697565  | 0.408365  |
| H | 1.273125  | 1.122402  | -1.771358 |
| C | -1.142409 | -0.051987 | -0.073329 |
| O | -2.158928 | -0.676548 | -0.242141 |
| O | -1.133426 | 1.158110  | 0.501892  |
| H | -2.041778 | 1.382936  | 0.747199  |

3-COOH-Acetonitrile

SCF Energy: -344.553014571

ZPE-corrected Energy: -344.450312

$\Delta U$ : -344.443871

$\Delta H$ : -344.442927

$\Delta G$ : -344.481549

Num. Imaginary Frequencies: 0

|   |           |           |           |
|---|-----------|-----------|-----------|
| C | 0.230126  | -0.533042 | -0.442871 |
| C | 1.189568  | -0.753286 | 0.783464  |
| C | 2.071435  | 0.282563  | 0.130083  |
| C | 1.251790  | 0.487806  | -0.896937 |
| H | 0.118440  | -1.410012 | -1.076030 |
| H | 1.591615  | -1.763112 | 0.844608  |
| H | 0.762535  | -0.472058 | 1.745376  |
| H | 3.029843  | 0.695182  | 0.412798  |
| H | 1.274153  | 1.130149  | -1.766008 |
| C | -1.142261 | -0.051516 | -0.073718 |
| O | -2.158471 | -0.676968 | -0.242394 |
| O | -1.133853 | 1.157392  | 0.503440  |
| H | -2.041940 | 1.381308  | 0.750767  |

3-COOH-Dichloromethane  
SCF Energy: -344.552002874  
ZPE-corrected Energy: -344.449247  
 $\Delta U$ : -344.442804  
 $\Delta H$ : -344.441860  
 $\Delta G$ : -344.480543

Num. Imaginary Frequencies: 0

|   |           |           |           |
|---|-----------|-----------|-----------|
| C | 0.229768  | -0.542647 | -0.431273 |
| C | 1.191673  | -0.736269 | 0.797291  |
| C | 2.071846  | 0.285850  | 0.120526  |
| C | 1.249915  | 0.469279  | -0.908579 |
| H | 0.116993  | -1.432405 | -1.046127 |
| H | 1.594086  | -1.744469 | 0.879990  |
| H | 0.766092  | -0.433859 | 1.753371  |
| H | 3.030195  | 0.705569  | 0.392699  |
| H | 1.269808  | 1.094502  | -1.790072 |
| C | -1.142899 | -0.053559 | -0.072063 |
| O | -2.160647 | -0.675069 | -0.240848 |
| O | -1.131642 | 1.160776  | 0.495855  |
| H | -2.040682 | 1.389073  | 0.734682  |

3-COOH-DMSO  
SCF Energy: -344.553099561  
ZPE-corrected Energy: -344.450402  
 $\Delta U$ : -344.443961  
 $\Delta H$ : -344.443017  
 $\Delta G$ : -344.481632

Num. Imaginary Frequencies: 0

|   |           |           |           |
|---|-----------|-----------|-----------|
| C | 0.230175  | -0.531928 | -0.444140 |
| C | 1.189314  | -0.755118 | 0.781940  |
| C | 2.071443  | 0.282121  | 0.131123  |
| C | 1.252035  | 0.489845  | -0.895609 |
| H | 0.118624  | -1.407466 | -1.079301 |
| H | 1.591232  | -1.765125 | 0.840833  |
| H | 0.762112  | -0.476093 | 1.744424  |
| H | 3.029882  | 0.693887  | 0.414980  |
| H | 1.274682  | 1.134132  | -1.763237 |
| C | -1.142213 | -0.051303 | -0.073925 |
| O | -2.158220 | -0.677215 | -0.242552 |
| O | -1.134145 | 1.157042  | 0.504233  |
| H | -2.042138 | 1.380350  | 0.752527  |



3-COOH-Gas

SCF Energy: -344.545273969

ZPE-corrected Energy: -344.442239

$\Delta U$ : -344.435793

$\Delta H$ : -344.434849

$\Delta G$ : -344.473678

Num. Imaginary Frequencies: 0

|   |           |           |           |
|---|-----------|-----------|-----------|
| C | 0.227768  | -0.623765 | -0.305545 |
| C | 1.209907  | -0.555528 | 0.917466  |
| C | 2.071264  | 0.310709  | 0.031451  |
| C | 1.233085  | 0.273276  | -0.998903 |
| H | 0.108257  | -1.619079 | -0.727070 |
| H | 1.623789  | -1.522586 | 1.199684  |
| H | 0.795575  | -0.063380 | 1.796247  |
| H | 3.027959  | 0.786476  | 0.195282  |
| H | 1.233717  | 0.707236  | -1.988745 |
| C | -1.146493 | -0.070556 | -0.053410 |
| O | -2.171780 | -0.676122 | -0.196689 |
| O | -1.119189 | 1.205677  | 0.377208  |
| H | -2.034725 | 1.470086  | 0.534084  |

3-COOH-n-Hexane

SCF Energy: -344.548148502

ZPE-corrected Energy: -344.445227

$\Delta U$ : -344.438780

$\Delta H$ : -344.437836

$\Delta G$ : -344.476591

Num. Imaginary Frequencies: 0

|   |           |           |           |
|---|-----------|-----------|-----------|
| C | 0.228541  | -0.585186 | -0.373398 |
| C | 1.201606  | -0.653482 | 0.858042  |
| C | 2.071485  | 0.300952  | 0.077159  |
| C | 1.240717  | 0.378606  | -0.957468 |
| H | 0.111598  | -1.529856 | -0.899187 |
| H | 1.610050  | -1.647089 | 1.036079  |
| H | 0.782266  | -0.259308 | 1.782772  |
| H | 3.028772  | 0.751582  | 0.298682  |
| H | 1.250040  | 0.916326  | -1.894980 |
| C | -1.144894 | -0.062447 | -0.063174 |
| O | -2.167622 | -0.671906 | -0.225492 |
| O | -1.123741 | 1.180600  | 0.448344  |
| H | -2.036548 | 1.428140  | 0.646849  |

3-COOH-Water

SCF Energy: -344.553210248

ZPE-corrected Energy: -344.450519

$\Delta U$ : -344.444078

$\Delta H$ : -344.443134

$\Delta G$ : -344.481738

Num. Imaginary Frequencies: 0

|   |           |           |           |
|---|-----------|-----------|-----------|
| C | 0.230249  | -0.530198 | -0.446124 |
| C | 1.188850  | -0.757874 | 0.779647  |
| C | 2.071507  | 0.281317  | 0.132697  |
| C | 1.252463  | 0.492898  | -0.893573 |
| H | 0.118867  | -1.403585 | -1.084265 |
| H | 1.590352  | -1.768216 | 0.835362  |
| H | 0.761332  | -0.481899 | 1.742878  |
| H | 3.029981  | 0.691779  | 0.418329  |
| H | 1.275546  | 1.140319  | -1.758858 |
| C | -1.142172 | -0.050972 | -0.074304 |
| O | -2.157871 | -0.677564 | -0.242752 |
| O | -1.134519 | 1.156527  | 0.505401  |
| H | -2.042337 | 1.378877  | 0.755297  |

3-Me-Acetone

SCF Energy: -195.264889108

ZPE-corrected Energy: -195.149657

$\Delta U$ : -195.144530

$\Delta H$ : -195.143585

$\Delta G$ : -195.177298

Num. Imaginary Frequencies: 0

|   |           |           |           |
|---|-----------|-----------|-----------|
| C | 0.460058  | -0.017936 | -0.491265 |
| C | -0.590876 | 1.052977  | -0.049661 |
| C | -1.483102 | -0.122511 | 0.279879  |
| C | -0.589628 | -1.036587 | -0.094703 |
| H | 0.656849  | 0.008868  | -1.565064 |
| H | -0.944852 | 1.713497  | -0.841721 |
| H | -0.272718 | 1.655803  | 0.802323  |
| H | -2.489673 | -0.181541 | 0.672990  |
| H | -0.589831 | -2.119351 | -0.113319 |
| C | 1.763193  | -0.035481 | 0.286189  |
| H | 2.347949  | -0.926107 | 0.052420  |
| H | 2.370599  | 0.839374  | 0.050119  |
| H | 1.563802  | -0.033318 | 1.359614  |

3-Me-Acetonitrile

SCF Energy: -195.264928435

ZPE-corrected Energy: -195.149707

$\Delta U$ : -195.144579

$\Delta H$ : -195.143635

$\Delta G$ : -195.177348

Num. Imaginary Frequencies: 0

|   |           |           |           |
|---|-----------|-----------|-----------|
| C | 0.460064  | -0.017922 | -0.491240 |
| C | -0.590893 | 1.052982  | -0.049666 |
| C | -1.483145 | -0.122522 | 0.279858  |
| C | -0.589600 | -1.036620 | -0.094683 |
| H | 0.656883  | 0.008847  | -1.565028 |
| H | -0.944863 | 1.713515  | -0.841717 |
| H | -0.272778 | 1.655803  | 0.802336  |
| H | -2.489752 | -0.181537 | 0.672926  |
| H | -0.589735 | -2.119399 | -0.113306 |
| C | 1.763216  | -0.035467 | 0.286185  |
| H | 2.347862  | -0.926181 | 0.052481  |
| H | 2.370641  | 0.839328  | 0.049951  |
| H | 1.563888  | -0.033084 | 1.359634  |

3-Me-Dichloromethane

SCF Energy: -195.264777172

ZPE-corrected Energy: -195.149515

$\Delta U$ : -195.144389

$\Delta H$ : -195.143444

$\Delta G$ : -195.177156

Num. Imaginary Frequencies: 0

|   |           |           |           |
|---|-----------|-----------|-----------|
| C | 0.460041  | -0.017972 | -0.491340 |
| C | -0.590827 | 1.052962  | -0.049649 |
| C | -1.482975 | -0.122483 | 0.279946  |
| C | -0.589705 | -1.036493 | -0.094761 |
| H | 0.656760  | 0.008928  | -1.565165 |
| H | -0.944827 | 1.713440  | -0.841740 |
| H | -0.272549 | 1.655819  | 0.802272  |
| H | -2.489444 | -0.181558 | 0.673181  |
| H | -0.590103 | -2.119214 | -0.113368 |
| C | 1.763124  | -0.035522 | 0.286205  |
| H | 2.348188  | -0.925902 | 0.052261  |
| H | 2.370481  | 0.839500  | 0.050596  |
| H | 1.563554  | -0.033968 | 1.359562  |

3-Me-DMSO

SCF Energy: -195.264941337

ZPE-corrected Energy: -195.149724

$\Delta U$ : -195.144596

$\Delta H$ : -195.143651

$\Delta G$ : -195.177365

Num. Imaginary Frequencies: 0

|   |           |           |           |
|---|-----------|-----------|-----------|
| C | 0.460066  | -0.017918 | -0.491231 |
| C | -0.590899 | 1.052984  | -0.049668 |
| C | -1.483159 | -0.122525 | 0.279851  |
| C | -0.589591 | -1.036631 | -0.094677 |
| H | 0.656894  | 0.008840  | -1.565017 |
| H | -0.944867 | 1.713520  | -0.841715 |
| H | -0.272798 | 1.655803  | 0.802340  |
| H | -2.489778 | -0.181536 | 0.672905  |
| H | -0.589703 | -2.119415 | -0.113302 |
| C | 1.763224  | -0.035462 | 0.286184  |
| H | 2.347833  | -0.926205 | 0.052501  |
| H | 2.370655  | 0.839313  | 0.049895  |
| H | 1.563915  | -0.033007 | 1.359641  |

3-Me-Gas

SCF Energy: -195.263872477

ZPE-corrected Energy: -195.148381

$\Delta U$ : -195.143264

$\Delta H$ : -195.142320

$\Delta G$ : -195.176017

Num. Imaginary Frequencies: 0

|   |           |           |           |
|---|-----------|-----------|-----------|
| C | 0.459902  | -0.018228 | -0.491960 |
| C | -0.590526 | 1.052817  | -0.049647 |
| C | -1.481893 | -0.122317 | 0.280609  |
| C | -0.590195 | -1.035786 | -0.095244 |
| H | 0.656365  | 0.009367  | -1.565918 |
| H | -0.944831 | 1.712828  | -0.842013 |
| H | -0.271319 | 1.656344  | 0.801469  |
| H | -2.487534 | -0.181835 | 0.674831  |
| H | -0.592096 | -2.118151 | -0.114068 |
| C | 1.762471  | -0.035810 | 0.286382  |
| H | 2.349683  | -0.924493 | 0.051401  |
| H | 2.369637  | 0.840270  | 0.054188  |
| H | 1.561542  | -0.038383 | 1.359267  |

3-Me-n-Hexane

SCF Energy: -195.264238452

ZPE-corrected Energy: -195.148838

$\Delta U$ : -195.143717

$\Delta H$ : -195.142772

$\Delta G$ : -195.176476

Num. Imaginary Frequencies: 0

|   |           |           |           |
|---|-----------|-----------|-----------|
| C | 0.459958  | -0.018131 | -0.491713 |
| C | -0.590628 | 1.052881  | -0.049638 |
| C | -1.482332 | -0.122371 | 0.280336  |
| C | -0.590024 | -1.036060 | -0.095057 |
| H | 0.656471  | 0.009196  | -1.565632 |
| H | -0.944805 | 1.713081  | -0.841901 |
| H | -0.271778 | 1.656078  | 0.801843  |
| H | -2.488305 | -0.181695 | 0.674174  |
| H | -0.591339 | -2.118571 | -0.113750 |
| C | 1.762745  | -0.035703 | 0.286308  |
| H | 2.349150  | -0.925024 | 0.051689  |
| H | 2.369958  | 0.839998  | 0.052795  |
| H | 1.562335  | -0.036753 | 1.359368  |

3-Me-Water

SCF Energy: -195.264958182

ZPE-corrected Energy: -195.149745

$\Delta U$ : -195.144617

$\Delta H$ : -195.143673

$\Delta G$ : -195.177386

Num. Imaginary Frequencies: 0

|   |           |           |           |
|---|-----------|-----------|-----------|
| C | 0.460069  | -0.017912 | -0.491221 |
| C | -0.590907 | 1.052986  | -0.049670 |
| C | -1.483178 | -0.122530 | 0.279842  |
| C | -0.589579 | -1.036645 | -0.094669 |
| H | 0.656910  | 0.008831  | -1.565001 |
| H | -0.944872 | 1.713527  | -0.841714 |
| H | -0.272823 | 1.655804  | 0.802344  |
| H | -2.489811 | -0.181534 | 0.672878  |
| H | -0.589661 | -2.119435 | -0.113298 |
| C | 1.763234  | -0.035456 | 0.286182  |
| H | 2.347795  | -0.926237 | 0.052528  |
| H | 2.370673  | 0.839293  | 0.049823  |
| H | 1.563952  | -0.032905 | 1.359649  |

3-NH2-Acetone

SCF Energy: -211.309741013

ZPE-corrected Energy: -211.205180

$\Delta U$ : -211.200119

$\Delta H$ : -211.199175

$\Delta G$ : -211.232810

Num. Imaginary Frequencies: 0

|   |           |           |           |
|---|-----------|-----------|-----------|
| C | -0.484322 | -0.016038 | 0.451392  |
| C | 0.570173  | 1.055163  | 0.033347  |
| C | 1.477498  | -0.121515 | -0.247248 |
| C | 0.567329  | -1.037137 | 0.076940  |
| H | -0.694459 | 0.011120  | 1.525950  |
| H | 0.889046  | 1.736080  | 0.822806  |
| H | 0.265122  | 1.627416  | -0.842494 |
| H | 2.506593  | -0.180245 | -0.577009 |
| H | 0.560595  | -2.119266 | 0.093765  |
| N | -1.686335 | -0.033109 | -0.373292 |
| H | -2.221640 | -0.871726 | -0.176714 |
| H | -2.284979 | 0.745550  | -0.119846 |

3-NH2-Acetonitrile

SCF Energy: -211.309954337

ZPE-corrected Energy: -211.205394

$\Delta U$ : -211.200334

$\Delta H$ : -211.199390

$\Delta G$ : -211.233024

Num. Imaginary Frequencies: 0

|   |           |           |           |
|---|-----------|-----------|-----------|
| C | -0.484317 | -0.016134 | 0.451381  |
| C | 0.570138  | 1.055170  | 0.033633  |
| C | 1.477451  | -0.121450 | -0.247528 |
| C | 0.567411  | -1.037205 | 0.076941  |
| H | -0.694982 | 0.010903  | 1.525768  |
| H | 0.889153  | 1.735622  | 0.823402  |
| H | 0.265127  | 1.628204  | -0.841745 |
| H | 2.506564  | -0.180045 | -0.577313 |
| H | 0.560810  | -2.119338 | 0.094206  |
| N | -1.686312 | -0.033235 | -0.373604 |
| H | -2.222286 | -0.871059 | -0.175230 |
| H | -2.284300 | 0.746069  | -0.120428 |

3-NH2-Dichloromethane  
SCF Energy: -211.309147714  
ZPE-corrected Energy: -211.204581  
 $\Delta U$ : -211.199518  
 $\Delta H$ : -211.198574  
 $\Delta G$ : -211.232212

Num. Imaginary Frequencies: 0

|   |           |           |           |
|---|-----------|-----------|-----------|
| C | -0.484336 | -0.015774 | 0.451483  |
| C | 0.570257  | 1.055151  | 0.032595  |
| C | 1.477584  | -0.121686 | -0.246570 |
| C | 0.567123  | -1.036950 | 0.076984  |
| H | -0.693062 | 0.011730  | 1.526493  |
| H | 0.888811  | 1.737329  | 0.821179  |
| H | 0.264990  | 1.625277  | -0.844475 |
| H | 2.506608  | -0.180778 | -0.576333 |
| H | 0.560076  | -2.119064 | 0.092729  |
| N | -1.686364 | -0.032762 | -0.372466 |
| H | -2.219730 | -0.873637 | -0.181025 |
| H | -2.286910 | 0.744029  | -0.118261 |

3-NH2-DMSO  
SCF Energy: -211.310024918  
ZPE-corrected Energy: -211.205465  
 $\Delta U$ : -211.200405  
 $\Delta H$ : -211.199461  
 $\Delta G$ : -211.233094

Num. Imaginary Frequencies: 0

|   |           |           |           |
|---|-----------|-----------|-----------|
| C | -0.484315 | -0.016166 | 0.451380  |
| C | 0.570127  | 1.055173  | 0.033730  |
| C | 1.477434  | -0.121428 | -0.247624 |
| C | 0.567439  | -1.037227 | 0.076943  |
| H | -0.695158 | 0.010832  | 1.525710  |
| H | 0.889191  | 1.735471  | 0.823600  |
| H | 0.265123  | 1.628467  | -0.841493 |
| H | 2.506552  | -0.179978 | -0.577421 |
| H | 0.560884  | -2.119362 | 0.094360  |
| N | -1.686303 | -0.033277 | -0.373709 |
| H | -2.222495 | -0.870841 | -0.174747 |
| H | -2.284078 | 0.746237  | -0.120621 |

3-NH2-Gas

SCF Energy: -211.304852182  
ZPE-corrected Energy: -211.200220  
 $\Delta U$ : -211.195129  
 $\Delta H$ : -211.194185  
 $\Delta G$ : -211.227893

Num. Imaginary Frequencies: 0

|   |           |           |           |
|---|-----------|-----------|-----------|
| C | -0.484362 | -0.013321 | 0.454742  |
| C | 0.570717  | 1.055340  | 0.028394  |
| C | 1.476107  | -0.123194 | -0.245543 |
| C | 0.565328  | -1.035535 | 0.079688  |
| H | -0.685912 | 0.017361  | 1.532015  |
| H | 0.890885  | 1.744049  | 0.810846  |
| H | 0.260046  | 1.613257  | -0.854257 |
| H | 2.503478  | -0.185502 | -0.578731 |
| H | 0.556896  | -2.117433 | 0.092920  |
| N | -1.684260 | -0.030091 | -0.368074 |
| H | -2.199564 | -0.889816 | -0.222364 |
| H | -2.302752 | 0.728986  | -0.107601 |

3-NH2-n-Hexane

SCF Energy: -211.306506441  
ZPE-corrected Energy: -211.201894  
 $\Delta U$ : -211.196821  
 $\Delta H$ : -211.195877  
 $\Delta G$ : -211.229537

Num. Imaginary Frequencies: 0

|   |           |           |           |
|---|-----------|-----------|-----------|
| C | -0.484374 | -0.014559 | 0.452961  |
| C | 0.570400  | 1.055205  | 0.029895  |
| C | 1.477104  | -0.122345 | -0.245219 |
| C | 0.566299  | -1.036099 | 0.078047  |
| H | -0.687953 | 0.014604  | 1.529604  |
| H | 0.888986  | 1.742000  | 0.814700  |
| H | 0.262513  | 1.617260  | -0.851231 |
| H | 2.505398  | -0.183093 | -0.576287 |
| H | 0.558554  | -2.118103 | 0.091132  |
| N | -1.685576 | -0.031295 | -0.369468 |
| H | -2.209184 | -0.882866 | -0.203577 |
| H | -2.295859 | 0.736057  | -0.112168 |



3-NH2-Water

SCF Energy: -211.310117537  
ZPE-corrected Energy: -211.205557  
 $\Delta U$ : -211.200498  
 $\Delta H$ : -211.199554  
 $\Delta G$ : -211.233186

Num. Imaginary Frequencies: 0

|   |           |           |           |
|---|-----------|-----------|-----------|
| C | -0.484313 | -0.016207 | 0.451381  |
| C | 0.570111  | 1.055177  | 0.033858  |
| C | 1.477410  | -0.121398 | -0.247754 |
| C | 0.567477  | -1.037257 | 0.076948  |
| H | -0.695390 | 0.010739  | 1.525634  |
| H | 0.889243  | 1.735271  | 0.823860  |
| H | 0.265115  | 1.628812  | -0.841160 |
| H | 2.506534  | -0.179889 | -0.577566 |
| H | 0.560985  | -2.119393 | 0.094568  |
| N | -1.686291 | -0.033332 | -0.373848 |
| H | -2.222765 | -0.870558 | -0.174119 |
| H | -2.283789 | 0.746454  | -0.120875 |

3-NO2-Acetone

SCF Energy: -360.478747578  
ZPE-corrected Energy: -360.387955  
 $\Delta U$ : -360.381821  
 $\Delta H$ : -360.380877  
 $\Delta G$ : -360.419286

Num. Imaginary Frequencies: 0

|   |           |           |           |
|---|-----------|-----------|-----------|
| C | -0.204973 | -0.289563 | 0.576636  |
| C | -1.103799 | -1.004304 | -0.479935 |
| C | -2.054512 | 0.144279  | -0.231534 |
| C | -1.247302 | 0.785594  | 0.610460  |
| H | 0.003079  | -0.850903 | 1.481323  |
| H | -1.434780 | -1.998246 | -0.187025 |
| H | -0.664714 | -1.038650 | -1.476020 |
| H | -3.049432 | 0.341578  | -0.603870 |
| H | -1.304535 | 1.704969  | 1.172878  |
| N | 1.134764  | 0.088187  | 0.014896  |
| O | 1.213956  | 1.089398  | -0.658620 |
| O | 2.057363  | -0.663410 | 0.240454  |

3-NO<sub>2</sub>-Acetonitrile

SCF Energy: -360.479034602  
ZPE-corrected Energy: -360.388246  
 $\Delta U$ : -360.382113  
 $\Delta H$ : -360.381169  
 $\Delta G$ : -360.419550

Num. Imaginary Frequencies: 0

|   |           |           |           |
|---|-----------|-----------|-----------|
| C | -0.204866 | -0.291149 | 0.576069  |
| C | -1.104233 | -1.002996 | -0.482078 |
| C | -2.054583 | 0.145161  | -0.230484 |
| C | -1.246984 | 0.784135  | 0.612968  |
| H | 0.003495  | -0.854645 | 1.479301  |
| H | -1.435391 | -1.997442 | -0.191179 |
| H | -0.665635 | -1.035233 | -1.478434 |
| H | -3.049736 | 0.343331  | -0.601728 |
| H | -1.304013 | 1.701690  | 1.178390  |
| N | 1.134645  | 0.087989  | 0.014743  |
| O | 1.212718  | 1.087981  | -0.660886 |
| O | 2.058877  | -0.661047 | 0.242336  |

3-NO<sub>2</sub>-Dichloromethane

SCF Energy: -360.477921697  
ZPE-corrected Energy: -360.387121  
 $\Delta U$ : -360.380981  
 $\Delta H$ : -360.380037  
 $\Delta G$ : -360.418557

Num. Imaginary Frequencies: 0

|   |           |           |           |
|---|-----------|-----------|-----------|
| C | -0.205277 | -0.285034 | 0.578208  |
| C | -1.102593 | -1.007965 | -0.473822 |
| C | -2.054316 | 0.141798  | -0.234490 |
| C | -1.248178 | 0.789757  | 0.603295  |
| H | 0.001837  | -0.840229 | 1.487008  |
| H | -1.433091 | -2.000439 | -0.175188 |
| H | -0.662115 | -1.048331 | -1.469105 |
| H | -3.048600 | 0.336585  | -0.609861 |
| H | -1.305955 | 1.714246  | 1.157158  |
| N | 1.135121  | 0.088718  | 0.015329  |
| O | 1.217553  | 1.093371  | -0.652171 |
| O | 2.052980  | -0.670146 | 0.235113  |

3-NO2-DMSO

SCF Energy: -360.479128435  
ZPE-corrected Energy: -360.388341  
 $\Delta U$ : -360.382209  
 $\Delta H$ : -360.381265  
 $\Delta G$ : -360.419638

Num. Imaginary Frequencies: 0

|   |           |           |           |
|---|-----------|-----------|-----------|
| C | -0.204829 | -0.291688 | 0.575871  |
| C | -1.104383 | -1.002549 | -0.482804 |
| C | -2.054609 | 0.145461  | -0.230122 |
| C | -1.246874 | 0.783639  | 0.613819  |
| H | 0.003636  | -0.855917 | 1.478609  |
| H | -1.435599 | -1.997169 | -0.192594 |
| H | -0.665952 | -1.034065 | -1.479252 |
| H | -3.049840 | 0.343930  | -0.600995 |
| H | -1.303828 | 1.700577  | 1.180254  |
| N | 1.134608  | 0.087921  | 0.014689  |
| O | 1.212299  | 1.087500  | -0.661653 |
| O | 2.059388  | -0.660247 | 0.242974  |

3-NO2-Gas

SCF Energy: -360.470528809  
ZPE-corrected Energy: -360.379592  
 $\Delta U$ : -360.373437  
 $\Delta H$ : -360.372493  
 $\Delta G$ : -360.411405

Num. Imaginary Frequencies: 0

|   |           |           |           |
|---|-----------|-----------|-----------|
| C | -0.203592 | -0.272012 | 0.581702  |
| C | -1.097382 | -1.019211 | -0.454016 |
| C | -2.053317 | 0.132877  | -0.241418 |
| C | -1.249627 | 0.800669  | 0.581800  |
| H | 0.000363  | -0.809161 | 1.502599  |
| H | -1.425587 | -2.009105 | -0.142713 |
| H | -0.650862 | -1.073746 | -1.446194 |
| H | -3.044229 | 0.323103  | -0.628253 |
| H | -1.306181 | 1.744372  | 1.102089  |
| N | 1.138569  | 0.091462  | 0.015102  |
| O | 1.223306  | 1.108836  | -0.629306 |
| O | 2.036697  | -0.692541 | 0.216599  |

3-NO2-n-Hexane

SCF Energy: -360.473704913

ZPE-corrected Energy: -360.382818

$\Delta U$ : -360.376673

$\Delta H$ : -360.375728

$\Delta G$ : -360.414386

Num. Imaginary Frequencies: 0

|   |           |           |           |
|---|-----------|-----------|-----------|
| C | -0.205394 | -0.270816 | 0.582575  |
| C | -1.098456 | -1.019237 | -0.453825 |
| C | -2.053562 | 0.133682  | -0.243046 |
| C | -1.250386 | 0.802452  | 0.580448  |
| H | -0.001650 | -0.806563 | 1.504156  |
| H | -1.427217 | -2.007504 | -0.138694 |
| H | -0.652848 | -1.077503 | -1.446122 |
| H | -3.045405 | 0.321452  | -0.628522 |
| H | -1.308563 | 1.743980  | 1.104544  |
| N | 1.137036  | 0.090523  | 0.016155  |
| O | 1.227782  | 1.106697  | -0.630550 |
| O | 2.037620  | -0.692197 | 0.217380  |

3-NO2-Water

SCF Energy: -360.479250717

ZPE-corrected Energy: -360.388465

$\Delta U$ : -360.382333

$\Delta H$ : -360.381389

$\Delta G$ : -360.419755

Num. Imaginary Frequencies: 0

|   |           |           |           |
|---|-----------|-----------|-----------|
| C | -0.204772 | -0.292472 | 0.575591  |
| C | -1.104684 | -1.002017 | -0.483676 |
| C | -2.054593 | 0.145965  | -0.229684 |
| C | -1.246628 | 0.783025  | 0.614904  |
| H | 0.003874  | -0.857633 | 1.477692  |
| H | -1.436070 | -1.996812 | -0.194298 |
| H | -0.666450 | -1.032772 | -1.480232 |
| H | -3.049900 | 0.344940  | -0.600072 |
| H | -1.303424 | 1.699090  | 1.182771  |
| N | 1.134544  | 0.087761  | 0.014586  |
| O | 1.211736  | 1.086958  | -0.662554 |
| O | 2.060042  | -0.659226 | 0.243706  |

3-OMe-Acetone  
SCF Energy: -270.479673167  
ZPE-corrected Energy: -270.359247  
 $\Delta U$ : -270.353111  
 $\Delta H$ : -270.352167  
 $\Delta G$ : -270.388785

Num. Imaginary Frequencies: 0

|   |           |           |           |
|---|-----------|-----------|-----------|
| C | 0.021309  | -0.226896 | 0.421579  |
| C | 0.767028  | 1.091900  | 0.027934  |
| C | 1.951777  | 0.182113  | -0.212808 |
| C | 1.292359  | -0.944272 | 0.052405  |
| H | -0.230454 | -0.269466 | 1.487962  |
| H | 0.872965  | 1.845400  | 0.808530  |
| H | 0.352208  | 1.549553  | -0.870193 |
| H | 2.980041  | 0.393809  | -0.474013 |
| H | 1.558007  | -1.992436 | 0.058167  |
| O | -1.097842 | -0.574781 | -0.349697 |
| C | -2.226372 | 0.205746  | -0.020825 |
| H | -3.044534 | -0.108045 | -0.664165 |
| H | -2.512106 | 0.058030  | 1.025308  |
| H | -2.029999 | 1.269861  | -0.183730 |

3-OMe-Acetonitrile  
SCF Energy: -270.479821755  
ZPE-corrected Energy: -270.359403  
 $\Delta U$ : -270.353265  
 $\Delta H$ : -270.352321  
 $\Delta G$ : -270.388943

Num. Imaginary Frequencies: 0

|   |           |           |           |
|---|-----------|-----------|-----------|
| C | 0.021394  | -0.226902 | 0.421735  |
| C | 0.766974  | 1.091899  | 0.028089  |
| C | 1.951713  | 0.182183  | -0.213127 |
| C | 1.292456  | -0.944273 | 0.052467  |
| H | -0.230640 | -0.269574 | 1.487990  |
| H | 0.873200  | 1.845070  | 0.808921  |
| H | 0.351947  | 1.550060  | -0.869688 |
| H | 2.979942  | 0.393988  | -0.474406 |
| H | 1.558437  | -1.992377 | 0.058763  |
| O | -1.097771 | -0.574826 | -0.349866 |
| C | -2.226518 | 0.205730  | -0.020842 |
| H | -3.044607 | -0.107807 | -0.664397 |
| H | -2.512257 | 0.057604  | 1.025174  |
| H | -2.029975 | 1.269824  | -0.183362 |

3-OMe-Dichloromethane  
SCF Energy: -270.479254279  
ZPE-corrected Energy: -270.358810  
 $\Delta U$ : -270.352676  
 $\Delta H$ : -270.351732  
 $\Delta G$ : -270.388344

Num. Imaginary Frequencies: 0

|   |           |           |           |
|---|-----------|-----------|-----------|
| C | 0.021068  | -0.226832 | 0.421194  |
| C | 0.767243  | 1.091917  | 0.027550  |
| C | 1.951941  | 0.181851  | -0.212014 |
| C | 1.292045  | -0.944289 | 0.052277  |
| H | -0.230006 | -0.269113 | 1.487914  |
| H | 0.872519  | 1.846261  | 0.807531  |
| H | 0.352962  | 1.548277  | -0.871470 |
| H | 2.980286  | 0.393182  | -0.473120 |
| H | 1.556729  | -1.992626 | 0.056617  |
| O | -1.098008 | -0.574584 | -0.349241 |
| C | -2.225994 | 0.205753  | -0.020812 |
| H | -3.044260 | -0.108682 | -0.663713 |
| H | -2.511846 | 0.059000  | 1.025586  |
| H | -2.030134 | 1.269969  | -0.184578 |

3-OMe-DMSO  
SCF Energy: -270.479870672  
ZPE-corrected Energy: -270.359454  
 $\Delta U$ : -270.353316  
 $\Delta H$ : -270.352372  
 $\Delta G$ : -270.388995

Num. Imaginary Frequencies: 0

|   |           |           |           |
|---|-----------|-----------|-----------|
| C | 0.021423  | -0.226902 | 0.421791  |
| C | 0.766958  | 1.091900  | 0.028146  |
| C | 1.951688  | 0.182204  | -0.213240 |
| C | 1.292487  | -0.944274 | 0.052489  |
| H | -0.230705 | -0.269610 | 1.488003  |
| H | 0.873289  | 1.844956  | 0.809059  |
| H | 0.351856  | 1.550236  | -0.869509 |
| H | 2.979903  | 0.394044  | -0.474556 |
| H | 1.558577  | -1.992358 | 0.058965  |
| O | -1.097745 | -0.574841 | -0.349921 |
| C | -2.226565 | 0.205724  | -0.020852 |
| H | -3.044626 | -0.107726 | -0.664487 |
| H | -2.512315 | 0.057458  | 1.025122  |
| H | -2.029966 | 1.269811  | -0.183237 |

3-OMe-Gas

SCF Energy: -270.476006557

ZPE-corrected Energy: -270.355452

$\Delta U$ : -270.349322

$\Delta H$ : -270.348377

$\Delta G$ : -270.384993

Num. Imaginary Frequencies: 0

|   |           |           |           |
|---|-----------|-----------|-----------|
| C | 0.019251  | -0.225136 | 0.420100  |
| C | 0.770306  | 1.092320  | 0.026023  |
| C | 1.952406  | 0.178312  | -0.208870 |
| C | 1.288392  | -0.944833 | 0.052286  |
| H | -0.227979 | -0.265128 | 1.488887  |
| H | 0.874671  | 1.850912  | 0.802597  |
| H | 0.358341  | 1.542707  | -0.877065 |
| H | 2.980996  | 0.385354  | -0.471706 |
| H | 1.545636  | -1.994490 | 0.048259  |
| O | -1.097940 | -0.571195 | -0.346423 |
| C | -2.223830 | 0.204703  | -0.021673 |
| H | -3.039907 | -0.112778 | -0.666083 |
| H | -2.514482 | 0.059914  | 1.024846  |
| H | -2.032907 | 1.270873  | -0.185555 |

3-OMe-n-Hexane

SCF Energy: -270.477299671

ZPE-corrected Energy: -270.356785

$\Delta U$ : -270.350655

$\Delta H$ : -270.349711

$\Delta G$ : -270.386318

Num. Imaginary Frequencies: 0

|   |           |           |           |
|---|-----------|-----------|-----------|
| C | 0.020001  | -0.226069 | 0.420493  |
| C | 0.768677  | 1.092212  | 0.026639  |
| C | 1.952183  | 0.180023  | -0.209845 |
| C | 1.290032  | -0.944513 | 0.052182  |
| H | -0.228626 | -0.267095 | 1.488478  |
| H | 0.872914  | 1.849552  | 0.804155  |
| H | 0.355846  | 1.543882  | -0.875393 |
| H | 2.980473  | 0.389111  | -0.472495 |
| H | 1.549886  | -1.993735 | 0.050693  |
| O | -1.098066 | -0.573024 | -0.347230 |
| C | -2.224299 | 0.205367  | -0.021446 |
| H | -3.041666 | -0.111168 | -0.664562 |
| H | -2.512756 | 0.060987  | 1.025299  |
| H | -2.031114 | 1.270541  | -0.186475 |

3-OMe-Water

SCF Energy: -270.479934675

ZPE-corrected Energy: -270.359521

$\Delta U$ : -270.353383

$\Delta H$ : -270.352439

$\Delta G$ : -270.389063

Num. Imaginary Frequencies: 0

|   |           |           |           |
|---|-----------|-----------|-----------|
| C | 0.021461  | -0.226904 | 0.421872  |
| C | 0.766935  | 1.091903  | 0.028228  |
| C | 1.951652  | 0.182232  | -0.213400 |
| C | 1.292527  | -0.944275 | 0.052521  |
| H | -0.230796 | -0.269659 | 1.488023  |
| H | 0.873416  | 1.844801  | 0.809251  |
| H | 0.351729  | 1.550476  | -0.869260 |
| H | 2.979844  | 0.394116  | -0.474777 |
| H | 1.558760  | -1.992333 | 0.059235  |
| O | -1.097708 | -0.574860 | -0.349990 |
| C | -2.226625 | 0.205715  | -0.020871 |
| H | -3.044642 | -0.107618 | -0.664619 |
| H | -2.512400 | 0.057265  | 1.025046  |
| H | -2.029949 | 1.269795  | -0.183076 |

E-CF3-Acetone

SCF Energy: -493.064459807

ZPE-corrected Energy: -492.973031

$\Delta U$ : -492.965211

$\Delta H$ : -492.964267

$\Delta G$ : -493.006246

Num. Imaginary Frequencies: 0

|   |           |           |           |
|---|-----------|-----------|-----------|
| C | 0.226193  | -0.271448 | 0.218742  |
| C | 3.211745  | -0.664742 | -0.080730 |
| C | 2.574440  | 0.485795  | 0.106055  |
| C | 1.127340  | 0.663332  | -0.055797 |
| H | 0.490443  | -1.241456 | 0.620389  |
| H | 2.686656  | -1.558652 | -0.394460 |
| H | 4.281335  | -0.740048 | 0.057034  |
| H | 3.136696  | 1.375166  | 0.366302  |
| H | 0.789330  | 1.631157  | -0.408411 |
| C | -1.233575 | -0.066244 | 0.011744  |
| F | -1.538523 | 1.147975  | -0.457539 |
| F | -1.740140 | -0.959251 | -0.857158 |
| F | -1.923706 | -0.227205 | 1.154593  |



E-CF3-Acetonitrile

SCF Energy: -493.064586911

ZPE-corrected Energy: -492.973167

$\Delta U$ : -492.965347

$\Delta H$ : -492.964403

$\Delta G$ : -493.006381

Num. Imaginary Frequencies: 0

|   |           |           |           |
|---|-----------|-----------|-----------|
| C | 0.226326  | -0.271863 | 0.218062  |
| C | 3.211751  | -0.664848 | -0.080481 |
| C | 2.574538  | 0.485889  | 0.105669  |
| C | 1.127344  | 0.663382  | -0.055530 |
| H | 0.490568  | -1.242505 | 0.618190  |
| H | 2.686559  | -1.559155 | -0.392935 |
| H | 4.281438  | -0.739920 | 0.056718  |
| H | 3.136873  | 1.375515  | 0.364815  |
| H | 0.789280  | 1.631666  | -0.406805 |
| C | -1.233381 | -0.066271 | 0.011726  |
| F | -1.538659 | 1.148695  | -0.455540 |
| F | -1.740490 | -0.957814 | -0.858523 |
| F | -1.923539 | -0.229030 | 1.154434  |

E-CF3-Dichloromethane

SCF Energy: -493.064093525

ZPE-corrected Energy: -492.972636

$\Delta U$ : -492.964817

$\Delta H$ : -492.963873

$\Delta G$ : -493.005850

Num. Imaginary Frequencies: 0

|   |           |           |           |
|---|-----------|-----------|-----------|
| C | 0.225809  | -0.270290 | 0.220663  |
| C | 3.211736  | -0.664429 | -0.081429 |
| C | 2.574156  | 0.485531  | 0.107142  |
| C | 1.127317  | 0.663174  | -0.056549 |
| H | 0.490079  | -1.238501 | 0.626593  |
| H | 2.686940  | -1.557213 | -0.398758 |
| H | 4.281050  | -0.740393 | 0.057930  |
| H | 3.136176  | 1.374181  | 0.370499  |
| H | 0.789442  | 1.629687  | -0.412938 |
| C | -1.234141 | -0.066175 | 0.011795  |
| F | -1.538105 | 1.145907  | -0.463239 |
| F | -1.739162 | -0.963329 | -0.853249 |
| F | -1.924172 | -0.221981 | 1.155037  |

E-CF3-DMSO

SCF Energy: -493.064628436

ZPE-corrected Energy: -492.973211

$\Delta U$ : -492.965391

$\Delta H$ : -492.964447

$\Delta G$ : -493.006426

Num. Imaginary Frequencies: 0

|   |           |           |           |
|---|-----------|-----------|-----------|
| C | 0.226369  | -0.272000 | 0.217839  |
| C | 3.211754  | -0.664882 | -0.080400 |
| C | 2.574570  | 0.485920  | 0.105542  |
| C | 1.127345  | 0.663398  | -0.055442 |
| H | 0.490608  | -1.242849 | 0.617469  |
| H | 2.686528  | -1.559319 | -0.392435 |
| H | 4.281472  | -0.739878 | 0.056615  |
| H | 3.136930  | 1.375630  | 0.364327  |
| H | 0.789262  | 1.631832  | -0.406278 |
| C | -1.233318 | -0.066280 | 0.011720  |
| F | -1.538702 | 1.148929  | -0.454887 |
| F | -1.740605 | -0.957344 | -0.858967 |
| F | -1.923484 | -0.229624 | 1.154382  |

E-CF3-Gas

SCF Energy: -493.060800582

ZPE-corrected Energy: -492.969058

$\Delta U$ : -492.961264

$\Delta H$ : -492.960320

$\Delta G$ : -493.002215

Num. Imaginary Frequencies: 0

|   |           |           |           |
|---|-----------|-----------|-----------|
| C | 0.222629  | -0.263301 | 0.231545  |
| C | 3.212326  | -0.661790 | -0.085975 |
| C | 2.571720  | 0.483629  | 0.113638  |
| C | 1.126237  | 0.662224  | -0.060953 |
| H | 0.488378  | -1.220013 | 0.662629  |
| H | 2.690548  | -1.547660 | -0.426088 |
| H | 4.279609  | -0.741443 | 0.065200  |
| H | 3.132421  | 1.367113  | 0.397695  |
| H | 0.788411  | 1.620561  | -0.438629 |
| C | -1.239806 | -0.066218 | 0.012056  |
| F | -1.535133 | 1.134276  | -0.495409 |
| F | -1.732014 | -0.986232 | -0.830854 |
| F | -1.925965 | -0.193137 | 1.157076  |

E-CF3-n-Hexane

SCF Energy: -493.062216920

ZPE-corrected Energy: -492.970595

$\Delta U$ : -492.962793

$\Delta H$ : -492.961848

$\Delta G$ : -493.003774

Num. Imaginary Frequencies: 0

|   |           |           |           |
|---|-----------|-----------|-----------|
| C | 0.224028  | -0.265261 | 0.229089  |
| C | 3.211771  | -0.662892 | -0.084307 |
| C | 2.572716  | 0.484366  | 0.111771  |
| C | 1.126889  | 0.662398  | -0.060017 |
| H | 0.488560  | -1.225284 | 0.653790  |
| H | 2.688495  | -1.550659 | -0.417403 |
| H | 4.279822  | -0.741643 | 0.062308  |
| H | 3.133683  | 1.369708  | 0.388926  |
| H | 0.789211  | 1.622714  | -0.433087 |
| C | -1.237270 | -0.066254 | 0.012108  |
| F | -1.535770 | 1.136725  | -0.487750 |
| F | -1.734601 | -0.980715 | -0.836340 |
| F | -1.926138 | -0.199229 | 1.156713  |

E-CF3-Water

SCF Energy: -493.064682530

ZPE-corrected Energy: -492.973269

$\Delta U$ : -492.965449

$\Delta H$ : -492.964505

$\Delta G$ : -493.006483

Num. Imaginary Frequencies: 0

|   |           |           |           |
|---|-----------|-----------|-----------|
| C | 0.226425  | -0.272179 | 0.217549  |
| C | 3.211757  | -0.664927 | -0.080294 |
| C | 2.574611  | 0.485961  | 0.105376  |
| C | 1.127345  | 0.663418  | -0.055327 |
| H | 0.490660  | -1.243299 | 0.616529  |
| H | 2.686488  | -1.559532 | -0.391781 |
| H | 4.281517  | -0.739822 | 0.056480  |
| H | 3.137003  | 1.375780  | 0.363690  |
| H | 0.789238  | 1.632046  | -0.405590 |
| C | -1.233236 | -0.066292 | 0.011712  |
| F | -1.538757 | 1.149234  | -0.454039 |
| F | -1.740756 | -0.956733 | -0.859545 |
| F | -1.923412 | -0.230397 | 1.154314  |

E-Me-Acetone

SCF Energy: -195.280667552

ZPE-corrected Energy: -195.166808

$\Delta U$ : -195.160696

$\Delta H$ : -195.159752

$\Delta G$ : -195.195746

Num. Imaginary Frequencies: 0

|   |           |           |           |
|---|-----------|-----------|-----------|
| C | 0.885256  | -0.295821 | -0.156140 |
| C | -2.147697 | -0.605713 | 0.101548  |
| C | -1.460268 | 0.516074  | -0.093803 |
| C | -0.009121 | 0.661854  | 0.080208  |
| H | 0.535407  | -1.253461 | -0.532291 |
| H | -1.664226 | -1.511622 | 0.446992  |
| H | -3.214678 | -0.647064 | -0.069650 |
| H | -1.996379 | 1.411846  | -0.391652 |
| H | 0.343025  | 1.637291  | 0.404141  |
| C | 2.358693  | -0.152760 | 0.044331  |
| H | 2.722665  | -0.885419 | 0.767624  |
| H | 2.898877  | -0.336252 | -0.886339 |
| H | 2.614134  | 0.842881  | 0.404313  |

E-Me-Acetonitrile

SCF Energy: -195.280753734

ZPE-corrected Energy: -195.166900

$\Delta U$ : -195.160788

$\Delta H$ : -195.159844

$\Delta G$ : -195.195839

Num. Imaginary Frequencies: 0

|   |           |           |           |
|---|-----------|-----------|-----------|
| C | 0.885255  | -0.296026 | -0.155593 |
| C | -2.147734 | -0.605819 | 0.101219  |
| C | -1.460342 | 0.516182  | -0.093453 |
| C | -0.009067 | 0.662000  | 0.079879  |
| H | 0.535402  | -1.254240 | -0.530306 |
| H | -1.664190 | -1.512207 | 0.445349  |
| H | -3.214824 | -0.646874 | -0.069437 |
| H | -1.996618 | 1.412225  | -0.390191 |
| H | 0.343188  | 1.637820  | 0.402526  |
| C | 2.358756  | -0.152688 | 0.044192  |
| H | 2.722918  | -0.884545 | 0.768199  |
| H | 2.898568  | -0.337472 | -0.886434 |
| H | 2.614352  | 0.843400  | 0.402828  |

E-Me-Dichloromethane  
SCF Energy: -195.280424284  
ZPE-corrected Energy: -195.166546  
 $\Delta U$ : -195.160435  
 $\Delta H$ : -195.159491  
 $\Delta G$ : -195.195482

Num. Imaginary Frequencies: 0

|   |           |           |           |
|---|-----------|-----------|-----------|
| C | 0.885250  | -0.295262 | -0.157635 |
| C | -2.147577 | -0.605428 | 0.102445  |
| C | -1.460066 | 0.515782  | -0.094754 |
| C | -0.009271 | 0.661454  | 0.081098  |
| H | 0.535407  | -1.251318 | -0.537716 |
| H | -1.664289 | -1.510006 | 0.451469  |
| H | -3.214259 | -0.647607 | -0.070216 |
| H | -1.995732 | 1.410803  | -0.395630 |
| H | 0.342582  | 1.635830  | 0.408560  |
| C | 2.358511  | -0.152956 | 0.044710  |
| H | 2.721984  | -0.887824 | 0.766018  |
| H | 2.899715  | -0.332865 | -0.886073 |
| H | 2.613516  | 0.841445  | 0.408406  |

E-Me-DMSO  
SCF Energy: -195.280782088  
ZPE-corrected Energy: -195.166930  
 $\Delta U$ : -195.160818  
 $\Delta H$ : -195.159874  
 $\Delta G$ : -195.195869

Num. Imaginary Frequencies: 0

|   |           |           |           |
|---|-----------|-----------|-----------|
| C | 0.885254  | -0.296095 | -0.155411 |
| C | -2.147745 | -0.605854 | 0.101109  |
| C | -1.460367 | 0.516218  | -0.093337 |
| C | -0.009049 | 0.662049  | 0.079770  |
| H | 0.535400  | -1.254498 | -0.529647 |
| H | -1.664176 | -1.512401 | 0.444803  |
| H | -3.214871 | -0.646812 | -0.069366 |
| H | -1.996698 | 1.412351  | -0.389705 |
| H | 0.343242  | 1.637995  | 0.401990  |
| C | 2.358776  | -0.152664 | 0.044147  |
| H | 2.723003  | -0.884256 | 0.768388  |
| H | 2.898465  | -0.337875 | -0.886466 |
| H | 2.614423  | 0.843571  | 0.402337  |

E-Me-Gas

SCF Energy: -195.278556226

ZPE-corrected Energy: -195.164518

$\Delta U$ : -195.158417

$\Delta H$ : -195.157473

$\Delta G$ : -195.193432

Num. Imaginary Frequencies: 0

|   |           |           |           |
|---|-----------|-----------|-----------|
| C | 0.885000  | -0.291653 | -0.167206 |
| C | -2.146308 | -0.603636 | 0.108116  |
| C | -1.458809 | 0.513943  | -0.100652 |
| C | -0.010337 | 0.658827  | 0.086488  |
| H | 0.535132  | -1.237114 | -0.572272 |
| H | -1.663842 | -1.499383 | 0.479263  |
| H | -3.211006 | -0.651493 | -0.073276 |
| H | -1.991753 | 1.403893  | -0.420417 |
| H | 0.339769  | 1.625928  | 0.436727  |
| C | 2.357055  | -0.154172 | 0.047188  |
| H | 2.717886  | -0.903147 | 0.755246  |
| H | 2.905179  | -0.310423 | -0.883873 |
| H | 2.609026  | 0.831883  | 0.435004  |

E-Me-n-Hexane

SCF Energy: -195.279292080

ZPE-corrected Energy: -195.165314

$\Delta U$ : -195.159211

$\Delta H$ : -195.158267

$\Delta G$ : -195.194234

Num. Imaginary Frequencies: 0

|   |           |           |           |
|---|-----------|-----------|-----------|
| C | 0.884882  | -0.292932 | -0.163631 |
| C | -2.146408 | -0.604474 | 0.106056  |
| C | -1.459241 | 0.514736  | -0.098319 |
| C | -0.010022 | 0.660038  | 0.084553  |
| H | 0.534725  | -1.242316 | -0.559413 |
| H | -1.663184 | -1.503326 | 0.469031  |
| H | -3.211746 | -0.650783 | -0.072655 |
| H | -1.993395 | 1.406322  | -0.411590 |
| H | 0.340865  | 1.629965  | 0.426011  |
| C | 2.357454  | -0.153825 | 0.046195  |
| H | 2.719218  | -0.897735 | 0.759085  |
| H | 2.902895  | -0.318664 | -0.884916 |
| H | 2.610636  | 0.835277  | 0.425318  |

E-Me-Water

SCF Energy: -195.280819172

ZPE-corrected Energy: -195.166970

$\Delta U$ : -195.160858

$\Delta H$ : -195.159914

$\Delta G$ : -195.195908

Num. Imaginary Frequencies: 0

|   |           |           |           |
|---|-----------|-----------|-----------|
| C | 0.885253  | -0.296184 | -0.155172 |
| C | -2.147760 | -0.605900 | 0.100966  |
| C | -1.460399 | 0.516265  | -0.093184 |
| C | -0.009026 | 0.662112  | 0.079626  |
| H | 0.535397  | -1.254836 | -0.528782 |
| H | -1.664157 | -1.512655 | 0.444085  |
| H | -3.214933 | -0.646731 | -0.069272 |
| H | -1.996804 | 1.412516  | -0.389066 |
| H | 0.343313  | 1.638224  | 0.401286  |
| C | 2.358803  | -0.152633 | 0.044086  |
| H | 2.723114  | -0.883877 | 0.768634  |
| H | 2.898330  | -0.338401 | -0.886508 |
| H | 2.614516  | 0.843795  | 0.401694  |

E-NH2-Acetone

SCF Energy: -211.335115740

ZPE-corrected Energy: -211.232114

$\Delta U$ : -211.226113

$\Delta H$ : -211.225169

$\Delta G$ : -211.260818

Num. Imaginary Frequencies: 0

|   |           |           |           |
|---|-----------|-----------|-----------|
| C | 0.915485  | -0.287579 | -0.110417 |
| C | -2.109081 | -0.618764 | 0.092679  |
| C | -1.424010 | 0.513694  | -0.075970 |
| C | 0.018760  | 0.696238  | 0.058036  |
| H | 0.581852  | -1.279705 | -0.394189 |
| H | -1.627312 | -1.538884 | 0.401265  |
| H | -3.176970 | -0.653071 | -0.072562 |
| H | -1.982278 | 1.408636  | -0.335421 |
| H | 0.376242  | 1.697527  | 0.273805  |
| N | 2.281713  | -0.156922 | -0.034738 |
| H | 2.639434  | 0.641076  | 0.465925  |
| H | 2.810112  | -0.998660 | 0.118375  |

E-NH2-Acetonitrile

SCF Energy: -211.335363298

ZPE-corrected Energy: -211.232371

$\Delta U$ : -211.226368

$\Delta H$ : -211.225424

$\Delta G$ : -211.261082

Num. Imaginary Frequencies: 0

|   |           |           |           |
|---|-----------|-----------|-----------|
| C | 0.915646  | -0.287967 | -0.109168 |
| C | -2.109337 | -0.618883 | 0.091680  |
| C | -1.424010 | 0.513857  | -0.075030 |
| C | 0.018891  | 0.696443  | 0.057260  |
| H | 0.582013  | -1.281067 | -0.389568 |
| H | -1.627644 | -1.540250 | 0.396692  |
| H | -3.177538 | -0.652069 | -0.071841 |
| H | -1.982577 | 1.409546  | -0.331279 |
| H | 0.376608  | 1.698190  | 0.270439  |
| N | 2.281613  | -0.157046 | -0.034940 |
| H | 2.640194  | 0.642598  | 0.462520  |
| H | 2.810509  | -0.998323 | 0.119159  |

E-NH2-Dichloromethane

SCF Energy: -211.334413990

ZPE-corrected Energy: -211.231392

$\Delta U$ : -211.225394

$\Delta H$ : -211.224450

$\Delta G$ : -211.260085

Num. Imaginary Frequencies: 0

|   |           |           |           |
|---|-----------|-----------|-----------|
| C | 0.915032  | -0.286475 | -0.113870 |
| C | -2.108351 | -0.618438 | 0.095429  |
| C | -1.424008 | 0.513232  | -0.078580 |
| C | 0.018390  | 0.695678  | 0.060175  |
| H | 0.581395  | -1.275843 | -0.406946 |
| H | -1.626372 | -1.535032 | 0.413886  |
| H | -3.175366 | -0.655889 | -0.074486 |
| H | -1.981437 | 1.406058  | -0.346847 |
| H | 0.375188  | 1.695662  | 0.283179  |
| N | 2.281986  | -0.156593 | -0.034168 |
| H | 2.637323  | 0.636809  | 0.475272  |
| H | 2.808997  | -0.999604 | 0.116194  |



E-NH2-DMSO

SCF Energy: -211.335444626  
ZPE-corrected Energy: -211.232456  
 $\Delta U$ : -211.226452  
 $\Delta H$ : -211.225508  
 $\Delta G$ : -211.261169

Num. Imaginary Frequencies: 0

|   |           |           |           |
|---|-----------|-----------|-----------|
| C | 0.915699  | -0.288094 | -0.108754 |
| C | -2.109421 | -0.618923 | 0.091348  |
| C | -1.424010 | 0.513910  | -0.074718 |
| C | 0.018934  | 0.696511  | 0.057003  |
| H | 0.582066  | -1.281515 | -0.388034 |
| H | -1.627753 | -1.540700 | 0.395174  |
| H | -3.177724 | -0.651739 | -0.071600 |
| H | -1.982676 | 1.409845  | -0.329905 |
| H | 0.376727  | 1.698408  | 0.269325  |
| N | 2.281580  | -0.157087 | -0.035007 |
| H | 2.640446  | 0.643101  | 0.461387  |
| H | 2.810639  | -0.998212 | 0.119419  |

E-NH2-Gas

SCF Energy: -211.328864118  
ZPE-corrected Energy: -211.225678  
 $\Delta U$ : -211.219694  
 $\Delta H$ : -211.218750  
 $\Delta G$ : -211.254318

Num. Imaginary Frequencies: 0

|   |           |           |           |
|---|-----------|-----------|-----------|
| C | 0.912112  | -0.279276 | -0.136011 |
| C | -2.103921 | -0.615721 | 0.112484  |
| C | -1.423949 | 0.509894  | -0.095460 |
| C | 0.016007  | 0.691114  | 0.073488  |
| H | 0.579338  | -1.249183 | -0.488031 |
| H | -1.621524 | -1.507929 | 0.492597  |
| H | -3.165178 | -0.673162 | -0.083919 |
| H | -1.974725 | 1.388305  | -0.418328 |
| H | 0.367920  | 1.680807  | 0.346261  |
| N | 2.284182  | -0.154282 | -0.030573 |
| H | 2.621615  | 0.609616  | 0.531981  |
| H | 2.801782  | -1.004546 | 0.106442  |

E-NH2-n-Hexane

SCF Energy: -211.331088164

ZPE-corrected Energy: -211.227985

$\Delta U$ : -211.221990

$\Delta H$ : -211.221046

$\Delta G$ : -211.256650

Num. Imaginary Frequencies: 0

|   |           |           |           |
|---|-----------|-----------|-----------|
| C | 0.913117  | -0.281600 | -0.128314 |
| C | -2.105230 | -0.616939 | 0.106713  |
| C | -1.423944 | 0.511091  | -0.089514 |
| C | 0.016805  | 0.693193  | 0.068847  |
| H | 0.579641  | -1.258598 | -0.459851 |
| H | -1.622774 | -1.517869 | 0.465952  |
| H | -3.168463 | -0.667733 | -0.081408 |
| H | -1.977502 | 1.394454  | -0.394034 |
| H | 0.370359  | 1.686978  | 0.323367  |
| N | 2.283092  | -0.155284 | -0.031481 |
| H | 2.628037  | 0.618532  | 0.513133  |
| H | 2.804565  | -1.003254 | 0.106817  |

E-NH2-Water

SCF Energy: -211.335550902

ZPE-corrected Energy: -211.232567

$\Delta U$ : -211.226562

$\Delta H$ : -211.225618

$\Delta G$ : -211.261283

Num. Imaginary Frequencies: 0

|   |           |           |           |
|---|-----------|-----------|-----------|
| C | 0.915769  | -0.288260 | -0.108209 |
| C | -2.109531 | -0.618975 | 0.090911  |
| C | -1.424010 | 0.513979  | -0.074308 |
| C | 0.018990  | 0.696600  | 0.056666  |
| H | 0.582134  | -1.282102 | -0.386016 |
| H | -1.627895 | -1.541289 | 0.393177  |
| H | -3.177969 | -0.651306 | -0.071281 |
| H | -1.982805 | 1.410237  | -0.328097 |
| H | 0.376883  | 1.698695  | 0.267863  |
| N | 2.281536  | -0.157143 | -0.035094 |
| H | 2.640777  | 0.643761  | 0.459893  |
| H | 2.810811  | -0.998066 | 0.119762  |

E-NO2-Acetone

SCF Energy: -360.490248538

ZPE-corrected Energy: -360.400768

$\Delta U$ : -360.393922

$\Delta H$ : -360.392978

$\Delta G$ : -360.432257

Num. Imaginary Frequencies: 0

|   |           |           |           |
|---|-----------|-----------|-----------|
| C | 0.105446  | -0.338474 | -0.145828 |
| C | -2.861073 | -0.628686 | 0.217322  |
| C | -2.218628 | 0.468348  | -0.172244 |
| C | -0.773638 | 0.652474  | -0.062982 |
| H | -0.098120 | -1.379033 | -0.335658 |
| H | -3.934235 | -0.709639 | 0.117111  |
| H | -2.339998 | -1.463770 | 0.668437  |
| H | -2.775159 | 1.310582  | -0.564570 |
| H | -0.394730 | 1.657716  | 0.075843  |
| N | 1.524275  | -0.073958 | 0.005581  |
| O | 1.908318  | 1.059097  | 0.208048  |
| O | 2.261640  | -1.036613 | -0.085277 |

E-NO2-Acetonitrile

SCF Energy: -360.490530970

ZPE-corrected Energy: -360.401057

$\Delta U$ : -360.394211

$\Delta H$ : -360.393267

$\Delta G$ : -360.432546

Num. Imaginary Frequencies: 0

|   |           |           |           |
|---|-----------|-----------|-----------|
| C | 0.105402  | -0.338670 | -0.145253 |
| C | -2.860982 | -0.628981 | 0.216466  |
| C | -2.218651 | 0.468729  | -0.171553 |
| C | -0.773641 | 0.652499  | -0.062872 |
| H | -0.098174 | -1.379397 | -0.334099 |
| H | -3.934244 | -0.709445 | 0.116894  |
| H | -2.339808 | -1.465086 | 0.665562  |
| H | -2.775225 | 1.311827  | -0.561889 |
| H | -0.394780 | 1.657849  | 0.075132  |
| N | 1.523944  | -0.074007 | 0.005554  |
| O | 1.908473  | 1.059126  | 0.207425  |
| O | 2.261759  | -1.036521 | -0.085076 |

E-NO<sub>2</sub>-Dichloromethane  
SCF Energy: -360.489432989  
ZPE-corrected Energy: -360.399936  
 $\Delta U$ : -360.393088  
 $\Delta H$ : -360.392144  
 $\Delta G$ : -360.431429

Num. Imaginary Frequencies: 0

|   |           |           |           |
|---|-----------|-----------|-----------|
| C | 0.105589  | -0.337874 | -0.147965 |
| C | -2.861270 | -0.627885 | 0.219777  |
| C | -2.218544 | 0.467279  | -0.174044 |
| C | -0.773600 | 0.652393  | -0.063241 |
| H | -0.097851 | -1.377892 | -0.340991 |
| H | -3.934131 | -0.710278 | 0.117689  |
| H | -2.340462 | -1.460061 | 0.676569  |
| H | -2.774959 | 1.307128  | -0.571788 |
| H | -0.394549 | 1.657234  | 0.078473  |
| N | 1.525208  | -0.073806 | 0.005599  |
| O | 1.907802  | 1.059064  | 0.209669  |
| O | 2.261253  | -1.036935 | -0.085458 |

E-NO<sub>2</sub>-DMSO

SCF Energy: -360.490623161  
ZPE-corrected Energy: -360.401151  
 $\Delta U$ : -360.394306  
 $\Delta H$ : -360.393362  
 $\Delta G$ : -360.432641

Num. Imaginary Frequencies: 0

|   |           |           |           |
|---|-----------|-----------|-----------|
| C | 0.105386  | -0.338723 | -0.145146 |
| C | -2.860931 | -0.629054 | 0.216313  |
| C | -2.218658 | 0.468816  | -0.171407 |
| C | -0.773645 | 0.652514  | -0.062882 |
| H | -0.098180 | -1.379488 | -0.333782 |
| H | -3.934210 | -0.709450 | 0.116866  |
| H | -2.339700 | -1.465374 | 0.664940  |
| H | -2.775237 | 1.312102  | -0.561305 |
| H | -0.394826 | 1.657898  | 0.074918  |
| N | 1.523833  | -0.074022 | 0.005550  |
| O | 1.908504  | 1.059126  | 0.207323  |
| O | 2.261797  | -1.036481 | -0.085041 |

E-NO2-Gas

SCF Energy: -360.482107207  
ZPE-corrected Energy: -360.392477  
 $\Delta U$ : -360.385633  
 $\Delta H$ : -360.384689  
 $\Delta G$ : -360.423978

Num. Imaginary Frequencies: 0

|   |           |           |           |
|---|-----------|-----------|-----------|
| C | 0.108017  | -0.335531 | -0.162810 |
| C | -2.866189 | -0.619931 | 0.236664  |
| C | -2.217466 | 0.459108  | -0.186803 |
| C | -0.772532 | 0.649053  | -0.064682 |
| H | -0.092516 | -1.372214 | -0.377612 |
| H | -3.936912 | -0.710028 | 0.120498  |
| H | -2.350155 | -1.431593 | 0.733904  |
| H | -2.770983 | 1.281564  | -0.624465 |
| H | -0.389728 | 1.649899  | 0.097645  |
| N | 1.533660  | -0.072352 | 0.005835  |
| O | 1.902105  | 1.060347  | 0.220082  |
| O | 2.259608  | -1.038768 | -0.085711 |

E-NO2-n-Hexane

SCF Energy: -360.485244174  
ZPE-corrected Energy: -360.395658  
 $\Delta U$ : -360.388812  
 $\Delta H$ : -360.387868  
 $\Delta G$ : -360.427161

Num. Imaginary Frequencies: 0

|   |           |           |           |
|---|-----------|-----------|-----------|
| C | 0.106744  | -0.335938 | -0.157767 |
| C | -2.863708 | -0.623398 | 0.230417  |
| C | -2.218088 | 0.462298  | -0.182014 |
| C | -0.773191 | 0.650847  | -0.063942 |
| H | -0.095063 | -1.373631 | -0.365465 |
| H | -3.935302 | -0.710932 | 0.120162  |
| H | -2.345273 | -1.442692 | 0.712489  |
| H | -2.773060 | 1.291465  | -0.604343 |
| H | -0.392415 | 1.653313  | 0.091519  |
| N | 1.530121  | -0.072949 | 0.005645  |
| O | 1.904949  | 1.059489  | 0.216173  |
| O | 2.260016  | -1.038207 | -0.085428 |

E-NO2-Water

SCF Energy: -360.490743104

ZPE-corrected Energy: -360.401276

$\Delta U$ : -360.394429

$\Delta H$ : -360.393485

$\Delta G$ : -360.432770

Num. Imaginary Frequencies: 0

|   |           |           |           |
|---|-----------|-----------|-----------|
| C | 0.105225  | -0.338675 | -0.144671 |
| C | -2.860664 | -0.629352 | 0.215806  |
| C | -2.218776 | 0.469035  | -0.171076 |
| C | -0.773574 | 0.652822  | -0.062737 |
| H | -0.098532 | -1.379466 | -0.332856 |
| H | -3.933998 | -0.709770 | 0.117174  |
| H | -2.338855 | -1.466087 | 0.662940  |
| H | -2.775497 | 1.312638  | -0.560007 |
| H | -0.394763 | 1.658198  | 0.074798  |
| N | 1.523681  | -0.074068 | 0.005489  |
| O | 1.908677  | 1.059074  | 0.206930  |
| O | 2.261649  | -1.036576 | -0.084980 |

E-OMe-Acetone

SCF Energy: -270.496424532

ZPE-corrected Energy: -270.377465

$\Delta U$ : -270.370235

$\Delta H$ : -270.369291

$\Delta G$ : -270.408838

Num. Imaginary Frequencies: 0

|   |           |           |           |
|---|-----------|-----------|-----------|
| C | -0.374636 | -0.007178 | 0.023023  |
| C | 2.536925  | 0.827388  | -0.120985 |
| C | 2.049490  | -0.374213 | 0.182571  |
| C | 0.676370  | -0.823414 | -0.048186 |
| H | -0.273218 | 1.037820  | 0.305477  |
| H | 1.936682  | 1.571515  | -0.630391 |
| H | 3.554842  | 1.095754  | 0.126078  |
| H | 2.712614  | -1.101652 | 0.640399  |
| H | 0.504474  | -1.872636 | -0.257989 |
| O | -1.629041 | -0.421323 | -0.253931 |
| C | -2.657520 | 0.471788  | 0.149002  |
| H | -3.595820 | 0.048670  | -0.195889 |
| H | -2.678607 | 0.570890  | 1.235189  |
| H | -2.512412 | 1.454001  | -0.303974 |

E-OMe-Acetonitrile  
SCF Energy: -270.496597117  
ZPE-corrected Energy: -270.377638  
 $\Delta U$ : -270.370409  
 $\Delta H$ : -270.369465  
 $\Delta G$ : -270.408998

Num. Imaginary Frequencies: 0

|   |           |           |           |
|---|-----------|-----------|-----------|
| C | -0.374651 | -0.007559 | 0.023413  |
| C | 2.536563  | 0.828117  | -0.120505 |
| C | 2.049861  | -0.374260 | 0.181418  |
| C | 0.676553  | -0.823650 | -0.048142 |
| H | -0.273479 | 1.037678  | 0.304960  |
| H | 1.935370  | 1.573325  | -0.627236 |
| H | 3.554799  | 1.096152  | 0.125641  |
| H | 2.713847  | -1.102384 | 0.636900  |
| H | 0.504863  | -1.873078 | -0.257207 |
| O | -1.629118 | -0.422426 | -0.251996 |
| C | -2.657627 | 0.472526  | 0.147770  |
| H | -3.595994 | 0.048066  | -0.195235 |
| H | -2.678277 | 0.575771  | 1.233528  |
| H | -2.512380 | 1.452830  | -0.309113 |

E-OMe-Dichloromethane  
SCF Energy: -270.495936308  
ZPE-corrected Energy: -270.376971  
 $\Delta U$ : -270.369740  
 $\Delta H$ : -270.368796  
 $\Delta G$ : -270.408363

Num. Imaginary Frequencies: 0

|   |           |           |           |
|---|-----------|-----------|-----------|
| C | -0.374559 | -0.005905 | 0.021658  |
| C | 2.538003  | 0.825186  | -0.122328 |
| C | 2.048398  | -0.374134 | 0.185967  |
| C | 0.675787  | -0.822714 | -0.048200 |
| H | -0.272363 | 1.038481  | 0.306426  |
| H | 1.940519  | 1.566185  | -0.639389 |
| H | 3.555008  | 1.094491  | 0.127345  |
| H | 2.708978  | -1.099583 | 0.650581  |
| H | 0.503207  | -1.871393 | -0.259849 |
| O | -1.628775 | -0.417887 | -0.259896 |
| C | -2.657240 | 0.469449  | 0.152842  |
| H | -3.595265 | 0.050721  | -0.198249 |
| H | -2.679906 | 0.555311  | 1.240267  |
| H | -2.512309 | 1.457587  | -0.287596 |

E-OMe-DMSO

SCF Energy: -270.496653861

ZPE-corrected Energy: -270.377695

$\Delta U$ : -270.370467

$\Delta H$ : -270.369522

$\Delta G$ : -270.409051

Num. Imaginary Frequencies: 0

|   |           |           |           |
|---|-----------|-----------|-----------|
| C | -0.374655 | -0.007675 | 0.023529  |
| C | 2.536448  | 0.828350  | -0.120347 |
| C | 2.049981  | -0.374277 | 0.181048  |
| C | 0.676610  | -0.823725 | -0.048122 |
| H | -0.273561 | 1.037644  | 0.304767  |
| H | 1.934949  | 1.573908  | -0.626209 |
| H | 3.554788  | 1.096275  | 0.125501  |
| H | 2.714243  | -1.102625 | 0.635769  |
| H | 0.504984  | -1.873222 | -0.256932 |
| O | -1.629141 | -0.422772 | -0.251386 |
| C | -2.657663 | 0.472756  | 0.147384  |
| H | -3.596048 | 0.047886  | -0.195051 |
| H | -2.678192 | 0.577280  | 1.233005  |
| H | -2.512358 | 1.452464  | -0.310704 |

E-OMe-Gas

SCF Energy: -270.492079346

ZPE-corrected Energy: -270.372899

$\Delta U$ : -270.365734

$\Delta H$ : -270.364790

$\Delta G$ : -270.404076

Num. Imaginary Frequencies: 0

|   |           |           |           |
|---|-----------|-----------|-----------|
| C | -0.373336 | 0.003127  | 0.013100  |
| C | 2.543163  | 0.811237  | -0.129385 |
| C | 2.041373  | -0.374388 | 0.205486  |
| C | 0.671559  | -0.818438 | -0.048311 |
| H | -0.264908 | 1.044094  | 0.310052  |
| H | 1.961465  | 1.532514  | -0.689845 |
| H | 3.554389  | 1.087052  | 0.135042  |
| H | 2.686335  | -1.087528 | 0.709220  |
| H | 0.492843  | -1.863560 | -0.270480 |
| O | -1.626906 | -0.394639 | -0.295975 |
| C | -2.653845 | 0.453184  | 0.176101  |
| H | -3.590652 | 0.063407  | -0.211287 |
| H | -2.686288 | 0.457753  | 1.267852  |
| H | -2.511420 | 1.475051  | -0.184697 |



E-OMe-n-Hexane  
SCF Energy: -270.493629668  
ZPE-corrected Energy: -270.374528  
 $\Delta U$ : -270.367345  
 $\Delta H$ : -270.366401  
 $\Delta G$ : -270.405758

Num. Imaginary Frequencies: 0

|   |           |           |           |
|---|-----------|-----------|-----------|
| C | -0.373878 | 0.000217  | 0.015322  |
| C | 2.541961  | 0.815757  | -0.127157 |
| C | 2.043714  | -0.374224 | 0.199487  |
| C | 0.672991  | -0.819802 | -0.048045 |
| H | -0.267764 | 1.042458  | 0.307897  |
| H | 1.955404  | 1.543721  | -0.673973 |
| H | 3.555213  | 1.089053  | 0.132593  |
| H | 2.693711  | -1.091546 | 0.690788  |
| H | 0.496676  | -1.866329 | -0.266073 |
| O | -1.627508 | -0.402347 | -0.284949 |
| C | -2.655484 | 0.458627  | 0.169138  |
| H | -3.592416 | 0.060066  | -0.208247 |
| H | -2.685302 | 0.487225  | 1.260098  |
| H | -2.511282 | 1.470681  | -0.215959 |

E-OMe-Water  
SCF Energy: -270.496728047  
ZPE-corrected Energy: -270.377768  
 $\Delta U$ : -270.370541  
 $\Delta H$ : -270.369597  
 $\Delta G$ : -270.409119

Num. Imaginary Frequencies: 0

|   |           |           |           |
|---|-----------|-----------|-----------|
| C | -0.374658 | -0.007818 | 0.023671  |
| C | 2.536300  | 0.828648  | -0.120142 |
| C | 2.050135  | -0.374302 | 0.180569  |
| C | 0.676682  | -0.823823 | -0.048093 |
| H | -0.273666 | 1.037609  | 0.304499  |
| H | 1.934403  | 1.574660  | -0.624873 |
| H | 3.554775  | 1.096431  | 0.125320  |
| H | 2.714753  | -1.102938 | 0.634305  |
| H | 0.505137  | -1.873411 | -0.256562 |
| O | -1.629168 | -0.423213 | -0.250607 |
| C | -2.657712 | 0.473047  | 0.146892  |
| H | -3.596116 | 0.047664  | -0.194833 |
| H | -2.678096 | 0.579185  | 1.232337  |
| H | -2.512320 | 1.451999  | -0.312714 |

E-trans-CHO-Acetone  
SCF Energy: -269.304395699  
ZPE-corrected Energy: -269.208484  
 $\Delta U$ : -269.202043  
 $\Delta H$ : -269.201099  
 $\Delta G$ : -269.238717

Num. Imaginary Frequencies: 0

|   |           |           |           |
|---|-----------|-----------|-----------|
| C | -0.455268 | -0.160584 | 0.116476  |
| C | 2.514278  | -0.744384 | -0.104240 |
| C | 1.962195  | 0.448490  | 0.100220  |
| C | 0.533317  | 0.727934  | -0.034700 |
| H | -0.276046 | -1.193785 | 0.389160  |
| H | 3.579089  | -0.893106 | 0.008413  |
| H | 1.923887  | -1.599645 | -0.408633 |
| H | 2.593105  | 1.292396  | 0.353154  |
| H | 0.262342  | 1.754840  | -0.264241 |
| C | -1.842234 | 0.256542  | -0.073457 |
| O | -2.796735 | -0.481495 | 0.027396  |
| H | -1.982217 | 1.323275  | -0.322812 |

E-trans-CHO-Acetonitrile  
SCF Energy: -269.304653134  
ZPE-corrected Energy: -269.208744  
 $\Delta U$ : -269.202302  
 $\Delta H$ : -269.201357  
 $\Delta G$ : -269.238983

Num. Imaginary Frequencies: 0

|   |           |           |           |
|---|-----------|-----------|-----------|
| C | -0.455277 | -0.160853 | 0.115819  |
| C | 2.514146  | -0.744516 | -0.103727 |
| C | 1.962203  | 0.448643  | 0.099781  |
| C | 0.533271  | 0.728014  | -0.034492 |
| H | -0.275947 | -1.194439 | 0.387017  |
| H | 3.579061  | -0.893018 | 0.008292  |
| H | 1.923631  | -1.600273 | -0.406500 |
| H | 2.593217  | 1.292879  | 0.351269  |
| H | 0.262198  | 1.755146  | -0.262783 |
| C | -1.841972 | 0.256692  | -0.073161 |
| O | -2.796788 | -0.481466 | 0.027339  |
| H | -1.982077 | 1.323549  | -0.321326 |

E-trans-CHO-Dichloromethane  
SCF Energy: -269.30365514  
ZPE-corrected Energy: -269.207741  
 $\Delta U$ : -269.201303  
 $\Delta H$ : -269.200358  
 $\Delta G$ : -269.237963

Num. Imaginary Frequencies: 0

|   |           |           |           |
|---|-----------|-----------|-----------|
| C | -0.455272 | -0.159875 | 0.117970  |
| C | 2.514756  | -0.744036 | -0.105438 |
| C | 1.962239  | 0.448112  | 0.101145  |
| C | 0.533445  | 0.727724  | -0.035136 |
| H | -0.276511 | -1.192219 | 0.394044  |
| H | 3.579292  | -0.893288 | 0.008921  |
| H | 1.924707  | -1.598241 | -0.413361 |
| H | 2.592920  | 1.291247  | 0.357442  |
| H | 0.262684  | 1.754115  | -0.267554 |
| C | -1.843066 | 0.256183  | -0.074104 |
| O | -2.796613 | -0.481621 | 0.027497  |
| H | -1.982802 | 1.322711  | -0.326097 |

E-trans-CHO-DMSO  
SCF Energy: -269.304737295  
ZPE-corrected Energy: -269.208829  
 $\Delta U$ : -269.202386  
 $\Delta H$ : -269.201442  
 $\Delta G$ : -269.239069

Num. Imaginary Frequencies: 0

|   |           |           |           |
|---|-----------|-----------|-----------|
| C | -0.455280 | -0.160922 | 0.115667  |
| C | 2.514095  | -0.744551 | -0.103617 |
| C | 1.962196  | 0.448677  | 0.099708  |
| C | 0.533259  | 0.728038  | -0.034452 |
| H | -0.275901 | -1.194591 | 0.386540  |
| H | 3.579036  | -0.893005 | 0.008242  |
| H | 1.923550  | -1.600403 | -0.406070 |
| H | 2.593225  | 1.292987  | 0.350884  |
| H | 0.262176  | 1.755219  | -0.262470 |
| C | -1.841879 | 0.256730  | -0.073113 |
| O | -2.796801 | -0.481454 | 0.027346  |
| H | -1.982016 | 1.323591  | -0.321051 |

E-trans-CHO-Gas

SCF Energy: -269.297217198

ZPE-corrected Energy: -269.201355

$\Delta U$ : -269.194914

$\Delta H$ : -269.193970

$\Delta G$ : -269.231559

Num. Imaginary Frequencies: 0

|   |           |           |           |
|---|-----------|-----------|-----------|
| C | -0.455533 | -0.151950 | 0.128009  |
| C | 2.518278  | -0.741700 | -0.115742 |
| C | 1.962579  | 0.444009  | 0.110907  |
| C | 0.535189  | 0.727254  | -0.039311 |
| H | -0.280677 | -1.177097 | 0.431806  |
| H | 3.579941  | -0.896983 | 0.014690  |
| H | 1.931273  | -1.584880 | -0.457454 |
| H | 2.591129  | 1.278834  | 0.399498  |
| H | 0.268275  | 1.749419  | -0.295832 |
| C | -1.850936 | 0.253607  | -0.081462 |
| O | -2.794567 | -0.484173 | 0.031525  |
| H | -1.990864 | 1.316771  | -0.359319 |

E-trans-CHO-n-Hexane

SCF Energy: -269.299926403

ZPE-corrected Energy: -269.204042

$\Delta U$ : -269.197602

$\Delta H$ : -269.196657

$\Delta G$ : -269.234254

Num. Imaginary Frequencies: 0

|   |           |           |           |
|---|-----------|-----------|-----------|
| C | -0.455361 | -0.155571 | 0.124347  |
| C | 2.516868  | -0.742565 | -0.111484 |
| C | 1.962449  | 0.445857  | 0.106641  |
| C | 0.534359  | 0.727213  | -0.037536 |
| H | -0.278845 | -1.183639 | 0.417030  |
| H | 3.579831  | -0.895096 | 0.011960  |
| H | 1.928536  | -1.590574 | -0.438855 |
| H | 2.591911  | 1.284446  | 0.381292  |
| H | 0.265520  | 1.751068  | -0.284332 |
| C | -1.847495 | 0.254565  | -0.078141 |
| O | -2.795610 | -0.482822 | 0.029349  |
| H | -1.986986 | 1.319384  | -0.344855 |

E-trans-CHO-Water  
SCF Energy: -269.304846966  
ZPE-corrected Energy: -269.208940  
 $\Delta U$ : -269.202497  
 $\Delta H$ : -269.201552  
 $\Delta G$ : -269.239183

Num. Imaginary Frequencies: 0

|   |           |           |           |
|---|-----------|-----------|-----------|
| C | -0.455282 | -0.161020 | 0.115431  |
| C | 2.514027  | -0.744602 | -0.103444 |
| C | 1.962189  | 0.448729  | 0.099585  |
| C | 0.533242  | 0.728073  | -0.034390 |
| H | -0.275836 | -1.194817 | 0.385801  |
| H | 3.579005  | -0.892985 | 0.008180  |
| H | 1.923434  | -1.600602 | -0.405398 |
| H | 2.593247  | 1.293146  | 0.350292  |
| H | 0.262139  | 1.755330  | -0.261987 |
| C | -1.841760 | 0.256785  | -0.073031 |
| O | -2.796818 | -0.481440 | 0.027351  |
| H | -1.981944 | 1.323667  | -0.320604 |

E-trans-COMe-Acetone  
SCF Energy: -308.621605816  
ZPE-corrected Energy: -308.497526  
 $\Delta U$ : -308.489669  
 $\Delta H$ : -308.488725  
 $\Delta G$ : -308.529883

Num. Imaginary Frequencies: 0

|   |           |           |           |
|---|-----------|-----------|-----------|
| C | 0.040127  | -0.399053 | -0.140757 |
| C | -2.965325 | -0.552012 | 0.228357  |
| C | -2.270160 | 0.510684  | -0.166473 |
| C | -0.812800 | 0.626845  | -0.076993 |
| H | -0.312547 | -1.411985 | -0.298702 |
| H | -4.041994 | -0.581067 | 0.135037  |
| H | -2.482100 | -1.413386 | 0.672630  |
| H | -2.794786 | 1.375584  | -0.556118 |
| H | -0.422621 | 1.633060  | 0.032620  |
| C | 1.505691  | -0.265025 | -0.018868 |
| O | 2.204662  | -1.259344 | -0.068415 |
| C | 2.110806  | 1.102726  | 0.163899  |
| H | 1.846159  | 1.750032  | -0.672416 |
| H | 1.729954  | 1.568254  | 1.073074  |
| H | 3.190609  | 1.009276  | 0.226205  |

E-trans-COMe-Acetonitrile  
SCF Energy: -308.621879320  
ZPE-corrected Energy: -308.497801  
 $\Delta U$ : -308.489945  
 $\Delta H$ : -308.489001  
 $\Delta G$ : -308.530157

Num. Imaginary Frequencies: 0

|   |           |           |           |
|---|-----------|-----------|-----------|
| C | 0.040178  | -0.399223 | -0.140246 |
| C | -2.965293 | -0.552091 | 0.228121  |
| C | -2.270092 | 0.510742  | -0.166433 |
| C | -0.812729 | 0.626822  | -0.077110 |
| H | -0.312582 | -1.412272 | -0.297388 |
| H | -4.042003 | -0.580869 | 0.135100  |
| H | -2.482171 | -1.413790 | 0.671896  |
| H | -2.794614 | 1.375927  | -0.555538 |
| H | -0.422589 | 1.633112  | 0.031736  |
| C | 1.505543  | -0.264867 | -0.018799 |
| O | 2.204802  | -1.259313 | -0.068671 |
| C | 2.110640  | 1.102716  | 0.163906  |
| H | 1.845438  | 1.750209  | -0.672068 |
| H | 1.730112  | 1.568024  | 1.073316  |
| H | 3.190508  | 1.009559  | 0.225679  |

E-trans-COMe-Dichloromethane  
SCF Energy: -308.620823338  
ZPE-corrected Energy: -308.496737  
 $\Delta U$ : -308.488877  
 $\Delta H$ : -308.487933  
 $\Delta G$ : -308.529100

Num. Imaginary Frequencies: 0

|   |           |           |           |
|---|-----------|-----------|-----------|
| C | 0.039986  | -0.398565 | -0.142168 |
| C | -2.965418 | -0.551711 | 0.229307  |
| C | -2.270379 | 0.510419  | -0.166813 |
| C | -0.813033 | 0.626909  | -0.076905 |
| H | -0.312413 | -1.411213 | -0.302179 |
| H | -4.041969 | -0.581627 | 0.135139  |
| H | -2.481890 | -1.411924 | 0.675437  |
| H | -2.795316 | 1.374312  | -0.558408 |
| H | -0.422811 | 1.632966  | 0.034608  |
| C | 1.506115  | -0.265451 | -0.019087 |
| O | 2.204268  | -1.259405 | -0.067915 |
| C | 2.111312  | 1.102725  | 0.164149  |
| H | 1.847821  | 1.749930  | -0.672665 |
| H | 1.729967  | 1.568402  | 1.073083  |
| H | 3.190968  | 1.008438  | 0.227413  |

E-trans-COMe-DMSO  
SCF Energy: -308.621968894  
ZPE-corrected Energy: -308.497891  
 $\Delta U$ : -308.490036  
 $\Delta H$ : -308.489092  
 $\Delta G$ : -308.530247

Num. Imaginary Frequencies: 0

|   |           |           |           |
|---|-----------|-----------|-----------|
| C | 0.040195  | -0.399277 | -0.140080 |
| C | -2.965282 | -0.552114 | 0.228058  |
| C | -2.270071 | 0.510757  | -0.166430 |
| C | -0.812707 | 0.626815  | -0.077159 |
| H | -0.312592 | -1.412367 | -0.296951 |
| H | -4.042005 | -0.580805 | 0.135135  |
| H | -2.482191 | -1.413909 | 0.671689  |
| H | -2.794560 | 1.376025  | -0.555377 |
| H | -0.422583 | 1.633132  | 0.031425  |
| C | 1.505495  | -0.264814 | -0.018777 |
| O | 2.204848  | -1.259301 | -0.068764 |
| C | 2.110587  | 1.102712  | 0.163920  |
| H | 1.845185  | 1.750284  | -0.671921 |
| H | 1.730182  | 1.567926  | 1.073426  |
| H | 3.190478  | 1.009651  | 0.225496  |

E-trans-COMe-Gas  
SCF Energy: -308.614199080  
ZPE-corrected Energy: -308.490049  
 $\Delta U$ : -308.482181  
 $\Delta H$ : -308.481237  
 $\Delta G$ : -308.522403

Num. Imaginary Frequencies: 0

|   |           |           |           |
|---|-----------|-----------|-----------|
| C | 0.039257  | -0.395951 | -0.150586 |
| C | -2.967827 | -0.546046 | 0.244422  |
| C | -2.272709 | 0.505135  | -0.176494 |
| C | -0.815660 | 0.625967  | -0.082949 |
| H | -0.309389 | -1.408361 | -0.319467 |
| H | -4.043278 | -0.583892 | 0.142794  |
| H | -2.483048 | -1.390018 | 0.718800  |
| H | -2.799146 | 1.355148  | -0.596447 |
| H | -0.426720 | 1.632304  | 0.034445  |
| C | 1.509925  | -0.268305 | -0.020659 |
| O | 2.202879  | -1.258029 | -0.071117 |
| C | 2.115568  | 1.102385  | 0.173651  |
| H | 1.857759  | 1.756506  | -0.659914 |
| H | 1.735029  | 1.562765  | 1.085971  |
| H | 3.194438  | 1.000668  | 0.238444  |

E-trans-COMe-n-Hexane  
SCF Energy: -308.616953719  
ZPE-corrected Energy: -308.492848  
 $\Delta U$ : -308.484973  
 $\Delta H$ : -308.484029  
 $\Delta G$ : -308.525238

Num. Imaginary Frequencies: 0

|   |           |           |           |
|---|-----------|-----------|-----------|
| C | 0.039467  | -0.396568 | -0.148310 |
| C | -2.966320 | -0.549078 | 0.237176  |
| C | -2.271712 | 0.507900  | -0.171198 |
| C | -0.814499 | 0.626759  | -0.079505 |
| H | -0.310959 | -1.408639 | -0.315368 |
| H | -4.042270 | -0.583688 | 0.138989  |
| H | -2.481550 | -1.400905 | 0.697533  |
| H | -2.797956 | 1.364647  | -0.577093 |
| H | -0.424796 | 1.632685  | 0.037466  |
| C | 1.508270  | -0.267239 | -0.020218 |
| O | 2.202902  | -1.259040 | -0.068264 |
| C | 2.113898  | 1.102506  | 0.168578  |
| H | 1.853295  | 1.753246  | -0.666615 |
| H | 1.733279  | 1.565208  | 1.079559  |
| H | 3.193107  | 1.004091  | 0.232502  |

E-trans-COMe-Water  
SCF Energy: -308.622085741  
ZPE-corrected Energy: -308.498009  
 $\Delta U$ : -308.490154  
 $\Delta H$ : -308.489210  
 $\Delta G$ : -308.530364

Num. Imaginary Frequencies: 0

|   |           |           |           |
|---|-----------|-----------|-----------|
| C | 0.040217  | -0.399348 | -0.139864 |
| C | -2.965266 | -0.552142 | 0.227985  |
| C | -2.270044 | 0.510773  | -0.166434 |
| C | -0.812679 | 0.626806  | -0.077232 |
| H | -0.312604 | -1.412491 | -0.296378 |
| H | -4.042006 | -0.580723 | 0.135192  |
| H | -2.482216 | -1.414051 | 0.671446  |
| H | -2.794492 | 1.376143  | -0.555189 |
| H | -0.422579 | 1.633160  | 0.031004  |
| C | 1.505432  | -0.264744 | -0.018750 |
| O | 2.204907  | -1.259285 | -0.068892 |
| C | 2.110519  | 1.102705  | 0.163948  |
| H | 1.844841  | 1.750396  | -0.671704 |
| H | 1.730290  | 1.567780  | 1.073595  |
| H | 3.190440  | 1.009769  | 0.225246  |



E-trans-COOH-Acetone  
SCF Energy: -344.570069424  
ZPE-corrected Energy: -344.468400  
 $\Delta U$ : -344.461204  
 $\Delta H$ : -344.460260  
 $\Delta G$ : -344.500157

Num. Imaginary Frequencies: 0

|   |           |           |           |
|---|-----------|-----------|-----------|
| C | 0.060932  | -0.374222 | -0.144622 |
| C | -2.934886 | -0.598265 | 0.219158  |
| C | -2.264277 | 0.484166  | -0.163828 |
| C | -0.810992 | 0.632522  | -0.067225 |
| H | -0.252531 | -1.394441 | -0.320610 |
| H | -4.010392 | -0.651710 | 0.123577  |
| H | -2.432557 | -1.451879 | 0.657206  |
| H | -2.806700 | 1.341154  | -0.546080 |
| H | -0.430113 | 1.639292  | 0.060350  |
| C | 1.515715  | -0.196544 | -0.014940 |
| O | 2.308296  | -1.106454 | -0.072251 |
| O | 1.900310  | 1.074611  | 0.173693  |
| H | 2.864487  | 1.086393  | 0.242761  |

E-trans-COOH-Acetonitrile  
SCF Energy: -344.570329426  
ZPE-corrected Energy: -344.468672  
 $\Delta U$ : -344.461477  
 $\Delta H$ : -344.460532  
 $\Delta G$ : -344.500430

Num. Imaginary Frequencies: 0

|   |           |           |           |
|---|-----------|-----------|-----------|
| C | 0.060916  | -0.373882 | -0.143933 |
| C | -2.934998 | -0.598584 | 0.218400  |
| C | -2.264474 | 0.484408  | -0.163274 |
| C | -0.811147 | 0.632878  | -0.067024 |
| H | -0.252962 | -1.394145 | -0.319114 |
| H | -4.010531 | -0.651736 | 0.122930  |
| H | -2.432773 | -1.452977 | 0.655056  |
| H | -2.807036 | 1.341919  | -0.544125 |
| H | -0.430550 | 1.639856  | 0.059766  |
| C | 1.515808  | -0.196441 | -0.014961 |
| O | 2.308009  | -1.106937 | -0.072241 |
| O | 1.900982  | 1.074412  | 0.173305  |
| H | 2.865296  | 1.087010  | 0.241728  |

E-trans-COOH-Dichloromethane  
SCF Energy: -344.569316377  
ZPE-corrected Energy: -344.467620  
 $\Delta U$ : -344.460427  
 $\Delta H$ : -344.459483  
 $\Delta G$ : -344.499374

Num. Imaginary Frequencies: 0

|   |           |           |           |
|---|-----------|-----------|-----------|
| C | 0.060814  | -0.374016 | -0.146559 |
| C | -2.934606 | -0.597666 | 0.221414  |
| C | -2.264226 | 0.483429  | -0.165306 |
| C | -0.811063 | 0.632443  | -0.067682 |
| H | -0.252405 | -1.393842 | -0.325073 |
| H | -4.009932 | -0.652596 | 0.124858  |
| H | -2.431767 | -1.448727 | 0.663780  |
| H | -2.806798 | 1.338483  | -0.551776 |
| H | -0.429990 | 1.638878  | 0.062077  |
| C | 1.515745  | -0.196972 | -0.015216 |
| O | 2.308240  | -1.106154 | -0.072316 |
| O | 1.900109  | 1.074896  | 0.174959  |
| H | 2.864115  | 1.084564  | 0.245082  |

E-trans-COOH-DMSO  
SCF Energy: -344.570414271  
ZPE-corrected Energy: -344.468761  
 $\Delta U$ : -344.461565  
 $\Delta H$ : -344.460620  
 $\Delta G$ : -344.500518

Num. Imaginary Frequencies: 0

|   |           |           |           |
|---|-----------|-----------|-----------|
| C | 0.060929  | -0.373883 | -0.143841 |
| C | -2.934993 | -0.598632 | 0.218286  |
| C | -2.264481 | 0.484450  | -0.163202 |
| C | -0.811150 | 0.632892  | -0.066999 |
| H | -0.252970 | -1.394166 | -0.318887 |
| H | -4.010539 | -0.651711 | 0.122894  |
| H | -2.432776 | -1.453160 | 0.654691  |
| H | -2.807029 | 1.342070  | -0.543814 |
| H | -0.430592 | 1.639896  | 0.059688  |
| C | 1.515796  | -0.196387 | -0.014943 |
| O | 2.308005  | -1.106970 | -0.072237 |
| O | 1.900993  | 1.074376  | 0.173239  |
| H | 2.865324  | 1.087181  | 0.241616  |

E-trans-COOH-Gas

SCF Energy: -344.562442857

ZPE-corrected Energy: -344.460529

$\Delta U$ : -344.453345

$\Delta H$ : -344.452401

$\Delta G$ : -344.492267

Num. Imaginary Frequencies: 0

|   |           |           |           |
|---|-----------|-----------|-----------|
| C | 0.060701  | -0.374367 | -0.156645 |
| C | -2.936178 | -0.591944 | 0.235094  |
| C | -2.263499 | 0.477998  | -0.174683 |
| C | -0.810883 | 0.630043  | -0.071290 |
| H | -0.249624 | -1.392519 | -0.348672 |
| H | -4.010299 | -0.653049 | 0.130677  |
| H | -2.434215 | -1.427880 | 0.705947  |
| H | -2.805710 | 1.320773  | -0.588649 |
| H | -0.427480 | 1.634359  | 0.068974  |
| C | 1.517440  | -0.200724 | -0.016866 |
| O | 2.309694  | -1.102697 | -0.073429 |
| O | 1.897997  | 1.077824  | 0.183445  |
| H | 2.860313  | 1.071254  | 0.257933  |

E-trans-COOH-n-Hexane

SCF Energy: -344.565405569

ZPE-corrected Energy: -344.463583

$\Delta U$ : -344.456394

$\Delta H$ : -344.455449

$\Delta G$ : -344.495336

Num. Imaginary Frequencies: 0

|   |           |           |           |
|---|-----------|-----------|-----------|
| C | 0.060591  | -0.373762 | -0.152850 |
| C | -2.934963 | -0.594576 | 0.229757  |
| C | -2.263824 | 0.480215  | -0.170975 |
| C | -0.811045 | 0.631495  | -0.069736 |
| H | -0.251417 | -1.392358 | -0.339925 |
| H | -4.009546 | -0.653811 | 0.128501  |
| H | -2.432098 | -1.436255 | 0.689471  |
| H | -2.806549 | 1.327740  | -0.574057 |
| H | -0.428823 | 1.636719  | 0.066724  |
| C | 1.516569  | -0.199217 | -0.016246 |
| O | 2.308717  | -1.104394 | -0.073012 |
| O | 1.899075  | 1.076441  | 0.180055  |
| H | 2.862137  | 1.076662  | 0.253243  |

E-trans-COOH-Water  
SCF Energy: -344.570524686  
ZPE-corrected Energy: -344.468875  
 $\Delta U$ : -344.461679  
 $\Delta H$ : -344.460735  
 $\Delta G$ : -344.500634

Num. Imaginary Frequencies: 0

|   |           |           |           |
|---|-----------|-----------|-----------|
| C | 0.060947  | -0.373884 | -0.143723 |
| C | -2.934987 | -0.598694 | 0.218137  |
| C | -2.264491 | 0.484505  | -0.163108 |
| C | -0.811153 | 0.632910  | -0.066967 |
| H | -0.252979 | -1.394192 | -0.318592 |
| H | -4.010549 | -0.651679 | 0.122846  |
| H | -2.432782 | -1.453398 | 0.654218  |
| H | -2.807020 | 1.342267  | -0.543409 |
| H | -0.430647 | 1.639948  | 0.059587  |
| C | 1.515780  | -0.196316 | -0.014920 |
| O | 2.307999  | -1.107014 | -0.072232 |
| O | 1.901006  | 1.074329  | 0.173153  |
| H | 2.865360  | 1.087404  | 0.241469  |

Z-CF3-Acetone  
SCF Energy: -493.059288398  
ZPE-corrected Energy: -492.967705  
 $\Delta U$ : -492.959995  
 $\Delta H$ : -492.959051  
 $\Delta G$ : -493.000557

Num. Imaginary Frequencies: 0

|   |           |           |           |
|---|-----------|-----------|-----------|
| C | -0.131517 | 1.172892  | 0.281956  |
| C | 2.159171  | -1.014125 | 0.206238  |
| C | 2.146067  | 0.229163  | -0.258713 |
| C | 1.187182  | 1.265639  | 0.140924  |
| H | -0.706493 | 2.021816  | 0.624870  |
| H | 1.426286  | -1.361645 | 0.922793  |
| H | 2.919482  | -1.716333 | -0.106945 |
| H | 2.930658  | 0.555791  | -0.932621 |
| H | 1.620018  | 2.240355  | 0.341535  |
| C | -0.971909 | -0.028159 | -0.016478 |
| F | -1.025759 | -0.897243 | 1.011101  |
| F | -0.570469 | -0.724239 | -1.085428 |
| F | -2.239762 | 0.344543  | -0.256028 |

Z-CF3-Acetonitrile

SCF Energy: -493.059420559

ZPE-corrected Energy: -492.967848

$\Delta U$ : -492.960138

$\Delta H$ : -492.959194

$\Delta G$ : -493.000700

Num. Imaginary Frequencies: 0

|   |           |           |           |
|---|-----------|-----------|-----------|
| C | -0.131547 | 1.172936  | 0.282211  |
| C | 2.159551  | -1.014058 | 0.206317  |
| C | 2.145981  | 0.229153  | -0.258937 |
| C | 1.187160  | 1.265607  | 0.140985  |
| H | -0.706441 | 2.021833  | 0.625317  |
| H | 1.427126  | -1.361551 | 0.923377  |
| H | 2.919997  | -1.716121 | -0.106893 |
| H | 2.930290  | 0.555879  | -0.933124 |
| H | 1.620066  | 2.240272  | 0.341598  |
| C | -0.971884 | -0.027995 | -0.016368 |
| F | -1.025539 | -0.897743 | 1.010733  |
| F | -0.570807 | -0.723830 | -1.085800 |
| F | -2.239943 | 0.344442  | -0.255546 |

Z-CF3-Dichloromethane

SCF Energy: -493.058909352

ZPE-corrected Energy: -492.967295

$\Delta U$ : -492.959586

$\Delta H$ : -492.958642

$\Delta G$ : -493.000149

Num. Imaginary Frequencies: 0

|   |           |           |           |
|---|-----------|-----------|-----------|
| C | -0.131449 | 1.172778  | 0.281219  |
| C | 2.158091  | -1.014326 | 0.205987  |
| C | 2.146320  | 0.229201  | -0.258050 |
| C | 1.187228  | 1.265734  | 0.140746  |
| H | -0.706658 | 2.021792  | 0.623552  |
| H | 1.423872  | -1.361961 | 0.921057  |
| H | 2.918060  | -1.716911 | -0.107098 |
| H | 2.931753  | 0.555587  | -0.931098 |
| H | 1.619867  | 2.240597  | 0.341332  |
| C | -0.972002 | -0.028623 | -0.016786 |
| F | -1.026126 | -0.895968 | 1.012035  |
| F | -0.569670 | -0.725227 | -1.084539 |
| F | -2.239318 | 0.344786  | -0.257101 |

Z-CF3-DMSO

SCF Energy: -493.059463806

ZPE-corrected Energy: -492.967895

$\Delta U$ : -492.960185

$\Delta H$ : -492.959241

$\Delta G$ : -493.000747

Num. Imaginary Frequencies: 0

|   |           |           |           |
|---|-----------|-----------|-----------|
| C | -0.131557 | 1.172951  | 0.282294  |
| C | 2.159675  | -1.014036 | 0.206342  |
| C | 2.145953  | 0.229151  | -0.259009 |
| C | 1.187153  | 1.265596  | 0.141005  |
| H | -0.706424 | 2.021839  | 0.625462  |
| H | 1.427401  | -1.361522 | 0.923565  |
| H | 2.920168  | -1.716050 | -0.106877 |
| H | 2.930172  | 0.555910  | -0.933285 |
| H | 1.620081  | 2.240245  | 0.341617  |
| C | -0.971877 | -0.027941 | -0.016331 |
| F | -1.025457 | -0.897913 | 1.010608  |
| F | -0.570925 | -0.723688 | -1.085930 |
| F | -2.240005 | 0.344407  | -0.255377 |

Z-CF3-Gas

SCF Energy: -493.055628337

ZPE-corrected Energy: -492.963746

$\Delta U$ : -492.956052

$\Delta H$ : -492.955108

$\Delta G$ : -492.996570

Num. Imaginary Frequencies: 0

|   |           |           |           |
|---|-----------|-----------|-----------|
| C | -0.131630 | 1.173264  | 0.272586  |
| C | 2.146455  | -1.017568 | 0.201905  |
| C | 2.148921  | 0.229701  | -0.249922 |
| C | 1.187095  | 1.267148  | 0.138498  |
| H | -0.708887 | 2.024378  | 0.606197  |
| H | 1.397194  | -1.368570 | 0.898945  |
| H | 2.906507  | -1.721391 | -0.107648 |
| H | 2.946153  | 0.555945  | -0.909099 |
| H | 1.618141  | 2.243530  | 0.336738  |
| C | -0.973440 | -0.032049 | -0.019132 |
| F | -1.016819 | -0.889895 | 1.016116  |
| F | -0.569434 | -0.727075 | -1.083754 |
| F | -2.238581 | 0.343984  | -0.253332 |

Z-CF3-n-Hexane

SCF Energy: -493.057010532

ZPE-corrected Energy: -492.965257

$\Delta U$ : -492.957547

$\Delta H$ : -492.956603

$\Delta G$ : -492.998134

Num. Imaginary Frequencies: 0

|   |           |           |           |
|---|-----------|-----------|-----------|
| C | -0.131459 | 1.172743  | 0.276795  |
| C | 2.151983  | -1.015796 | 0.204114  |
| C | 2.147618  | 0.229474  | -0.253975 |
| C | 1.187183  | 1.266432  | 0.139639  |
| H | -0.707853 | 2.022654  | 0.614963  |
| H | 1.410075  | -1.364824 | 0.910198  |
| H | 2.911354  | -1.719476 | -0.107608 |
| H | 2.938673  | 0.555362  | -0.920695 |
| H | 1.618903  | 2.242097  | 0.339376  |
| C | -0.972718 | -0.030746 | -0.018194 |
| F | -1.022942 | -0.891726 | 1.014988  |
| F | -0.568345 | -0.727348 | -1.082977 |
| F | -2.238357 | 0.344801  | -0.257178 |

Z-CF3-Water

SCF Energy: -493.059520194

ZPE-corrected Energy: -492.967956

$\Delta U$ : -492.960246

$\Delta H$ : -492.959302

$\Delta G$ : -493.000809

Num. Imaginary Frequencies: 0

|   |           |           |           |
|---|-----------|-----------|-----------|
| C | -0.131571 | 1.172971  | 0.282403  |
| C | 2.159838  | -1.014008 | 0.206373  |
| C | 2.145917  | 0.229148  | -0.259103 |
| C | 1.187143  | 1.265583  | 0.141031  |
| H | -0.706404 | 2.021848  | 0.625649  |
| H | 1.427759  | -1.361486 | 0.923809  |
| H | 2.920393  | -1.715956 | -0.106855 |
| H | 2.930019  | 0.555952  | -0.933492 |
| H | 1.620101  | 2.240210  | 0.341642  |
| C | -0.971868 | -0.027871 | -0.016283 |
| F | -1.025342 | -0.898140 | 1.010441  |
| F | -0.571084 | -0.723498 | -1.086104 |
| F | -2.240089 | 0.344360  | -0.255146 |

Z-Me-Acetone

SCF Energy: -195.279003535

ZPE-corrected Energy: -195.164652

$\Delta U$ : -195.158745

$\Delta H$ : -195.157801

$\Delta G$ : -195.193421

Num. Imaginary Frequencies: 0

|   |           |           |           |
|---|-----------|-----------|-----------|
| C | -1.179572 | 0.565787  | 0.119932  |
| C | 1.621368  | -0.846782 | 0.179709  |
| C | 1.303996  | 0.385293  | -0.210415 |
| C | 0.048474  | 1.087920  | 0.078087  |
| H | -1.993783 | 1.243799  | 0.353712  |
| H | 0.950282  | -1.444367 | 0.782771  |
| H | 2.577989  | -1.282997 | -0.074870 |
| H | 2.041764  | 0.956199  | -0.766482 |
| H | 0.144157  | 2.156388  | 0.241841  |
| C | -1.572494 | -0.852334 | -0.150526 |
| H | -1.701476 | -1.409099 | 0.781003  |
| H | -2.527184 | -0.886089 | -0.674903 |
| H | -0.822376 | -1.373141 | -0.743792 |

Z-Me-Acetonitrile

SCF Energy: -195.279082608

ZPE-corrected Energy: -195.164735

$\Delta U$ : -195.158829

$\Delta H$ : -195.157885

$\Delta G$ : -195.193500

Num. Imaginary Frequencies: 0

|   |           |           |           |
|---|-----------|-----------|-----------|
| C | -1.179583 | 0.565914  | 0.119640  |
| C | 1.621151  | -0.847151 | 0.179301  |
| C | 1.304246  | 0.385410  | -0.209882 |
| C | 0.048544  | 1.088029  | 0.077988  |
| H | -1.993823 | 1.244074  | 0.352906  |
| H | 0.949477  | -1.445471 | 0.780980  |
| H | 2.578039  | -1.283074 | -0.074814 |
| H | 2.042639  | 0.956812  | -0.764616 |
| H | 0.144163  | 2.156569  | 0.241340  |
| C | -1.572567 | -0.852294 | -0.150285 |
| H | -1.700638 | -1.408929 | 0.781444  |
| H | -2.527706 | -0.886204 | -0.673797 |
| H | -0.822890 | -1.373228 | -0.744013 |



Z-Me-Dichloromethane  
SCF Energy: -195.278780581  
ZPE-corrected Energy: -195.164413  
 $\Delta U$ : -195.158506  
 $\Delta H$ : -195.157562  
 $\Delta G$ : -195.193183

Num. Imaginary Frequencies: 0

|   |           |           |           |
|---|-----------|-----------|-----------|
| C | -1.179552 | 0.565406  | 0.120811  |
| C | 1.621917  | -0.845698 | 0.180916  |
| C | 1.303226  | 0.384976  | -0.211965 |
| C | 0.048239  | 1.087661  | 0.078351  |
| H | -1.993733 | 1.242925  | 0.356075  |
| H | 0.952549  | -1.441135 | 0.788016  |
| H | 2.577738  | -1.282820 | -0.075019 |
| H | 2.039200  | 0.954376  | -0.771919 |
| H | 0.144093  | 2.155915  | 0.243284  |
| C | -1.572157 | -0.852489 | -0.151244 |
| H | -1.703377 | -1.409808 | 0.779648  |
| H | -2.525697 | -0.885910 | -0.677838 |
| H | -0.820812 | -1.372683 | -0.743455 |

Z-Me-DMSO  
SCF Energy: -195.279108635  
ZPE-corrected Energy: -195.164761  
 $\Delta U$ : -195.158857  
 $\Delta H$ : -195.157913  
 $\Delta G$ : -195.193525

Num. Imaginary Frequencies: 0

|   |           |           |           |
|---|-----------|-----------|-----------|
| C | -1.179587 | 0.565954  | 0.119546  |
| C | 1.621078  | -0.847271 | 0.179170  |
| C | 1.304326  | 0.385448  | -0.209711 |
| C | 0.048566  | 1.088066  | 0.077955  |
| H | -1.993837 | 1.244160  | 0.352648  |
| H | 0.949213  | -1.445825 | 0.780404  |
| H | 2.578051  | -1.283102 | -0.074795 |
| H | 2.042922  | 0.957008  | -0.764014 |
| H | 0.144165  | 2.156629  | 0.241178  |
| C | -1.572588 | -0.852281 | -0.150207 |
| H | -1.700356 | -1.408879 | 0.781585  |
| H | -2.527875 | -0.886243 | -0.673434 |
| H | -0.823055 | -1.373252 | -0.744090 |

Z-Me-Gas

SCF Energy: -195.277072506

ZPE-corrected Energy: -195.162551

$\Delta U$ : -195.156648

$\Delta H$ : -195.155704

$\Delta G$ : -195.191315

Num. Imaginary Frequencies: 0

|   |           |           |           |
|---|-----------|-----------|-----------|
| C | -1.179355 | 0.563178  | 0.125947  |
| C | 1.625425  | -0.838753 | 0.188232  |
| C | 1.298324  | 0.382819  | -0.221602 |
| C | 0.046785  | 1.085660  | 0.080033  |
| H | -1.992933 | 1.237914  | 0.370515  |
| H | 0.966583  | -1.420416 | 0.819490  |
| H | 2.576360  | -1.281240 | -0.075325 |
| H | 2.022729  | 0.943042  | -0.805213 |
| H | 0.143595  | 2.152613  | 0.251917  |
| C | -1.570110 | -0.853334 | -0.155426 |
| H | -1.714325 | -1.414036 | 0.771577  |
| H | -2.516666 | -0.884918 | -0.695044 |
| H | -0.811762 | -1.370375 | -0.741022 |

Z-Me-n-Hexane

SCF Energy: -195.277745398

ZPE-corrected Energy: -195.163274

$\Delta U$ : -195.157377

$\Delta H$ : -195.156433

$\Delta G$ : -195.192020

Num. Imaginary Frequencies: 0

|   |           |           |           |
|---|-----------|-----------|-----------|
| C | -1.179355 | 0.563946  | 0.124266  |
| C | 1.624271  | -0.841327 | 0.185612  |
| C | 1.300207  | 0.383581  | -0.218136 |
| C | 0.047404  | 1.086410  | 0.079441  |
| H | -1.993199 | 1.239776  | 0.365208  |
| H | 0.961759  | -1.428080 | 0.808389  |
| H | 2.576966  | -1.281934 | -0.075337 |
| H | 2.028826  | 0.946966  | -0.793467 |
| H | 0.143878  | 2.153843  | 0.248721  |
| C | -1.571115 | -0.852953 | -0.153974 |
| H | -1.711853 | -1.412254 | 0.774381  |
| H | -2.519786 | -0.884770 | -0.689769 |
| H | -0.815061 | -1.371489 | -0.741382 |

Z-Me-Water

SCF Energy: -195.279142684

ZPE-corrected Energy: -195.164796

$\Delta U$ : -195.158893

$\Delta H$ : -195.157948

$\Delta G$ : -195.193556

Num. Imaginary Frequencies: 0

|   |           |           |           |
|---|-----------|-----------|-----------|
| C | -1.179591 | 0.566007  | 0.119424  |
| C | 1.620982  | -0.847425 | 0.179002  |
| C | 1.304430  | 0.385498  | -0.209489 |
| C | 0.048595  | 1.088115  | 0.077913  |
| H | -1.993855 | 1.244271  | 0.352316  |
| H | 0.948869  | -1.446282 | 0.779659  |
| H | 2.578063  | -1.283142 | -0.074769 |
| H | 2.043289  | 0.957260  | -0.763236 |
| H | 0.144168  | 2.156708  | 0.240969  |
| C | -1.572613 | -0.852265 | -0.150108 |
| H | -1.699985 | -1.408818 | 0.781764  |
| H | -2.528094 | -0.886295 | -0.672960 |
| H | -0.823266 | -1.373281 | -0.744194 |

Z-NH2-Acetone

SCF Energy: -211.337139862

ZPE-corrected Energy: -211.233131

$\Delta U$ : -211.227520

$\Delta H$ : -211.226576

$\Delta G$ : -211.261401

Num. Imaginary Frequencies: 0

|   |           |           |           |
|---|-----------|-----------|-----------|
| C | -1.219902 | 0.471656  | -0.075000 |
| C | 1.624316  | -0.821963 | -0.123370 |
| C | 1.276873  | 0.443998  | 0.134142  |
| C | -0.018901 | 1.079140  | -0.055513 |
| H | -2.108514 | 1.076583  | -0.206588 |
| H | 0.953191  | -1.534385 | -0.583721 |
| H | 2.631028  | -1.163950 | 0.073907  |
| H | 2.050990  | 1.098723  | 0.524421  |
| H | -0.026446 | 2.157167  | -0.138462 |
| N | -1.474374 | -0.873606 | 0.035369  |
| H | -0.752409 | -1.438267 | 0.458380  |
| H | -2.401545 | -1.117616 | 0.342932  |

Z-NH2-Acetonitrile

SCF Energy: -211.337352655

ZPE-corrected Energy: -211.233352

$\Delta U$ : -211.227740

$\Delta H$ : -211.226796

$\Delta G$ : -211.261625

Num. Imaginary Frequencies: 0

|   |           |           |           |
|---|-----------|-----------|-----------|
| C | -1.220006 | 0.471795  | -0.074444 |
| C | 1.624573  | -0.822449 | -0.122401 |
| C | 1.277294  | 0.444101  | 0.132972  |
| C | -0.018716 | 1.079108  | -0.055080 |
| H | -2.108499 | 1.077135  | -0.204992 |
| H | 0.952821  | -1.536571 | -0.579156 |
| H | 2.631868  | -1.163542 | 0.073507  |
| H | 2.052237  | 1.099758  | 0.520075  |
| H | -0.026348 | 2.157241  | -0.136886 |
| N | -1.474926 | -0.873232 | 0.034754  |
| H | -0.753818 | -1.439299 | 0.457295  |
| H | -2.402648 | -1.117420 | 0.340596  |

Z-NH2-Dichloromethane

SCF Energy: -211.336539692

ZPE-corrected Energy: -211.232506

$\Delta U$ : -211.226900

$\Delta H$ : -211.225955

$\Delta G$ : -211.260771

Num. Imaginary Frequencies: 0

|   |           |           |           |
|---|-----------|-----------|-----------|
| C | -1.219671 | 0.471263  | -0.076503 |
| C | 1.623678  | -0.820559 | -0.126022 |
| C | 1.275600  | 0.443729  | 0.137321  |
| C | -0.019472 | 1.079245  | -0.056591 |
| H | -2.108638 | 1.074940  | -0.211253 |
| H | 0.954523  | -1.528553 | -0.596048 |
| H | 2.628887  | -1.164784 | 0.074823  |
| H | 2.047452  | 1.095922  | 0.536115  |
| H | -0.026740 | 2.156965  | -0.142763 |
| N | -1.472752 | -0.874699 | 0.037014  |
| H | -0.748580 | -1.435341 | 0.461732  |
| H | -2.398450 | -1.118327 | 0.349065  |

Z-NH2-DMSO

SCF Energy: -211.337421876  
ZPE-corrected Energy: -211.233418  
 $\Delta U$ : -211.227806  
 $\Delta H$ : -211.226862  
 $\Delta G$ : -211.261691

Num. Imaginary Frequencies: 0

|   |           |           |           |
|---|-----------|-----------|-----------|
| C | -1.219920 | 0.471675  | -0.074408 |
| C | 1.624830  | -0.822575 | -0.122132 |
| C | 1.277486  | 0.444214  | 0.132349  |
| C | -0.018464 | 1.078664  | -0.054809 |
| H | -2.108293 | 1.077392  | -0.204726 |
| H | 0.952227  | -1.536819 | -0.577589 |
| H | 2.631940  | -1.164030 | 0.074038  |
| H | 2.051929  | 1.100574  | 0.519515  |
| H | -0.026262 | 2.156921  | -0.136396 |
| N | -1.475359 | -0.872712 | 0.034668  |
| H | -0.754538 | -1.440196 | 0.455839  |
| H | -2.403075 | -1.116728 | 0.340642  |

Z-NH2-Gas

SCF Energy: -211.331920691  
ZPE-corrected Energy: -211.227662  
 $\Delta U$ : -211.222092  
 $\Delta H$ : -211.221148  
 $\Delta G$ : -211.255878

Num. Imaginary Frequencies: 0

|   |           |           |           |
|---|-----------|-----------|-----------|
| C | -1.217405 | 0.468640  | -0.086131 |
| C | 1.617055  | -0.811003 | -0.143864 |
| C | 1.266622  | 0.441880  | 0.158293  |
| C | -0.023080 | 1.080608  | -0.064149 |
| H | -2.109477 | 1.063087  | -0.239687 |
| H | 0.959414  | -1.485029 | -0.676805 |
| H | 2.610210  | -1.174224 | 0.080486  |
| H | 2.021634  | 1.075345  | 0.614727  |
| H | -0.028845 | 2.156476  | -0.168896 |
| N | -1.459650 | -0.882324 | 0.047919  |
| H | -0.719605 | -1.416078 | 0.481037  |
| H | -2.374933 | -1.124058 | 0.388815  |

Z-NH2-n-Hexane

SCF Energy: -211.333747399

ZPE-corrected Energy: -211.229585

$\Delta U$ : -211.224000

$\Delta H$ : -211.223055

$\Delta G$ : -211.257821

Num. Imaginary Frequencies: 0

|   |           |           |           |
|---|-----------|-----------|-----------|
| C | -1.218169 | 0.469705  | -0.082868 |
| C | 1.619422  | -0.814755 | -0.137468 |
| C | 1.270151  | 0.442487  | 0.150713  |
| C | -0.021608 | 1.080123  | -0.061391 |
| H | -2.108976 | 1.067819  | -0.229587 |
| H | 0.957205  | -1.501306 | -0.647952 |
| H | 2.617093  | -1.170993 | 0.078524  |
| H | 2.031743  | 1.082901  | 0.586236  |
| H | -0.027779 | 2.156693  | -0.159363 |
| N | -1.464712 | -0.879458 | 0.044073  |
| H | -0.730921 | -1.422689 | 0.475590  |
| H | -2.384152 | -1.121579 | 0.374132  |

Z-NH2-Water

SCF Energy: -211.337514312

ZPE-corrected Energy: -211.233521

$\Delta U$ : -211.227907

$\Delta H$ : -211.226963

$\Delta G$ : -211.261796

Num. Imaginary Frequencies: 0

|   |           |           |           |
|---|-----------|-----------|-----------|
| C | -1.220098 | 0.471898  | -0.073983 |
| C | 1.624760  | -0.822815 | -0.121646 |
| C | 1.277599  | 0.444193  | 0.132040  |
| C | -0.018595 | 1.079100  | -0.054721 |
| H | -2.108511 | 1.077515  | -0.203804 |
| H | 0.952554  | -1.538314 | -0.575534 |
| H | 2.632516  | -1.163188 | 0.073189  |
| H | 2.053189  | 1.100555  | 0.516671  |
| H | -0.026290 | 2.157306  | -0.135700 |
| N | -1.475308 | -0.872958 | 0.034265  |
| H | -0.754855 | -1.440091 | 0.456446  |
| H | -2.403448 | -1.117335 | 0.338739  |

Z-NO2-Acetone

SCF Energy: -360.481851068  
ZPE-corrected Energy: -360.392150  
 $\Delta U$ : -360.385377  
 $\Delta H$ : -360.384433  
 $\Delta G$ : -360.423948

Num. Imaginary Frequencies: 0

|   |           |           |           |
|---|-----------|-----------|-----------|
| C | -0.502657 | 1.034547  | -0.209511 |
| C | 2.178343  | -0.902558 | -0.190590 |
| C | 1.924071  | 0.310787  | 0.288019  |
| C | 0.810934  | 1.194042  | -0.056412 |
| H | -1.169978 | 1.852904  | -0.420365 |
| H | 1.512947  | -1.403031 | -0.876463 |
| H | 3.092524  | -1.410236 | 0.085929  |
| H | 2.662486  | 0.784150  | 0.925941  |
| H | 1.107897  | 2.232914  | -0.168784 |
| N | -1.245870 | -0.190254 | 0.001772  |
| O | -0.669185 | -1.255540 | 0.047153  |
| O | -2.449432 | -0.062689 | 0.134384  |

Z-NO2-Acetonitrile

SCF Energy: -360.482143800  
ZPE-corrected Energy: -360.392456  
 $\Delta U$ : -360.385681  
 $\Delta H$ : -360.384737  
 $\Delta G$ : -360.424282

Num. Imaginary Frequencies: 0

|   |           |           |           |
|---|-----------|-----------|-----------|
| C | -0.502503 | 1.034693  | -0.208000 |
| C | 2.178350  | -0.902137 | -0.194060 |
| C | 1.924362  | 0.309988  | 0.287903  |
| C | 0.811196  | 1.193820  | -0.054821 |
| H | -1.169562 | 1.853261  | -0.418732 |
| H | 1.512439  | -1.400540 | -0.881066 |
| H | 3.092743  | -1.410630 | 0.080246  |
| H | 2.663005  | 0.782079  | 0.926479  |
| H | 1.108271  | 2.232737  | -0.166373 |
| N | -1.245817 | -0.189948 | 0.002312  |
| O | -0.669074 | -1.255017 | 0.052929  |
| O | -2.450253 | -0.063164 | 0.129212  |

Z-NO2-Dichloromethane  
SCF Energy: -360.481014535  
ZPE-corrected Energy: -360.391278  
 $\Delta U$ : -360.384512  
 $\Delta H$ : -360.383567  
 $\Delta G$ : -360.423022

Num. Imaginary Frequencies: 0

|   |           |           |           |
|---|-----------|-----------|-----------|
| C | -0.503179 | 1.034239  | -0.213608 |
| C | 2.178085  | -0.903685 | -0.181624 |
| C | 1.923162  | 0.312831  | 0.288445  |
| C | 0.810138  | 1.194657  | -0.060511 |
| H | -1.171269 | 1.851947  | -0.424857 |
| H | 1.513854  | -1.409155 | -0.864748 |
| H | 3.091628  | -1.409406 | 0.100542  |
| H | 2.660871  | 0.789362  | 0.924903  |
| H | 1.106868  | 2.233407  | -0.175062 |
| N | -1.245986 | -0.191114 | 0.000343  |
| O | -0.669017 | -1.256463 | 0.032070  |
| O | -2.447144 | -0.061863 | 0.148007  |

Z-NO2-DMSO

SCF Energy: -360.482239715  
ZPE-corrected Energy: -360.392557  
 $\Delta U$ : -360.385781  
 $\Delta H$ : -360.384836  
 $\Delta G$ : -360.424396

Num. Imaginary Frequencies: 0

|   |           |           |           |
|---|-----------|-----------|-----------|
| C | -0.502394 | 1.034747  | -0.207369 |
| C | 2.178343  | -0.901986 | -0.195378 |
| C | 1.924523  | 0.309671  | 0.287813  |
| C | 0.811334  | 1.193726  | -0.054217 |
| H | -1.169344 | 1.853410  | -0.418047 |
| H | 1.512197  | -1.399643 | -0.882717 |
| H | 3.092805  | -1.410803 | 0.078091  |
| H | 2.663282  | 0.781285  | 0.926595  |
| H | 1.108463  | 2.232655  | -0.165475 |
| N | -1.245808 | -0.189841 | 0.002530  |
| O | -0.669152 | -1.254893 | 0.055150  |
| O | -2.450545 | -0.063227 | 0.127193  |



Z-NO2-Gas

SCF Energy: -360.473948973  
ZPE-corrected Energy: -360.384042  
 $\Delta U$ : -360.377261  
 $\Delta H$ : -360.376317  
 $\Delta G$ : -360.415847

Num. Imaginary Frequencies: 0

|   |           |           |           |
|---|-----------|-----------|-----------|
| C | -0.504143 | 1.032848  | -0.227426 |
| C | 2.171264  | -0.914260 | -0.133000 |
| C | 1.924097  | 0.323383  | 0.281511  |
| C | 0.808000  | 1.197835  | -0.080125 |
| H | -1.176456 | 1.848431  | -0.435978 |
| H | 1.499376  | -1.451859 | -0.781961 |
| H | 3.084682  | -1.407776 | 0.170561  |
| H | 2.669943  | 0.820091  | 0.893113  |
| H | 1.103006  | 2.236180  | -0.204921 |
| N | -1.248309 | -0.196062 | -0.005485 |
| O | -0.671601 | -1.260031 | -0.042624 |
| O | -2.433112 | -0.053902 | 0.211601  |

Z-NO2-n-Hexane

SCF Energy: -360.476884892  
ZPE-corrected Energy: -360.387014  
 $\Delta U$ : -360.380251  
 $\Delta H$ : -360.379306  
 $\Delta G$ : -360.418780

Num. Imaginary Frequencies: 0

|   |           |           |           |
|---|-----------|-----------|-----------|
| C | -0.504103 | 1.032996  | -0.226528 |
| C | 2.174940  | -0.909206 | -0.148555 |
| C | 1.921456  | 0.319854  | 0.287602  |
| C | 0.808165  | 1.196794  | -0.075111 |
| H | -1.174976 | 1.848653  | -0.438402 |
| H | 1.510774  | -1.433774 | -0.816343 |
| H | 3.086368  | -1.407949 | 0.152318  |
| H | 2.659754  | 0.808442  | 0.914528  |
| H | 1.104234  | 2.234997  | -0.197773 |
| N | -1.246888 | -0.194480 | -0.004323 |
| O | -0.670559 | -1.259534 | -0.021981 |
| O | -2.437026 | -0.056921 | 0.195917  |

Z-NO2-Water  
SCF Energy: -360.482364881  
ZPE-corrected Energy: -360.392689  
 $\Delta U$ : -360.385911  
 $\Delta H$ : -360.384966  
 $\Delta G$ : -360.424550

Num. Imaginary Frequencies: 0

|   |           |           |           |
|---|-----------|-----------|-----------|
| C | -0.502231 | 1.034821  | -0.206530 |
| C | 2.178228  | -0.901821 | -0.197148 |
| C | 1.924726  | 0.309246  | 0.287669  |
| C | 0.811535  | 1.193625  | -0.053386 |
| H | -1.169050 | 1.853596  | -0.417135 |
| H | 1.511734  | -1.398484 | -0.884890 |
| H | 3.092766  | -1.411115 | 0.075174  |
| H | 2.663717  | 0.780181  | 0.926667  |
| H | 1.108726  | 2.232576  | -0.164215 |
| N | -1.245770 | -0.189682 | 0.002825  |
| O | -0.669226 | -1.254706 | 0.058143  |
| O | -2.450905 | -0.063320 | 0.124481  |

Z-OMe-Acetone  
SCF Energy: -270.498165622  
ZPE-corrected Energy: -270.378613  
 $\Delta U$ : -270.371494  
 $\Delta H$ : -270.370550  
 $\Delta G$ : -270.409940

Num. Imaginary Frequencies: 0

|   |           |           |           |
|---|-----------|-----------|-----------|
| C | -0.484675 | 0.877061  | 0.000005  |
| C | 1.833403  | -1.184087 | -0.000023 |
| C | 1.917975  | 0.149051  | 0.000086  |
| C | 0.830130  | 1.120559  | -0.000016 |
| H | -1.204380 | 1.689811  | -0.000065 |
| H | 0.887156  | -1.703455 | -0.000152 |
| H | 2.735042  | -1.781941 | -0.000080 |
| H | 2.910155  | 0.588691  | -0.000030 |
| H | 1.105383  | 2.166075  | -0.000173 |
| O | -1.008610 | -0.362503 | 0.000036  |
| C | -2.429825 | -0.416775 | -0.000005 |
| H | -2.704418 | -1.466796 | -0.000243 |
| H | -2.831072 | 0.066203  | 0.891641  |
| H | -2.831038 | 0.066582  | -0.891466 |

Z-OMe-Acetonitrile  
SCF Energy: -270.498359180  
ZPE-corrected Energy: -270.378808  
 $\Delta U$ : -270.371691  
 $\Delta H$ : -270.370747  
 $\Delta G$ : -270.410120

Num. Imaginary Frequencies: 0

|   |           |           |           |
|---|-----------|-----------|-----------|
| C | -0.484788 | 0.877193  | -0.000028 |
| C | 1.833477  | -1.184193 | -0.000033 |
| C | 1.917869  | 0.149056  | 0.000120  |
| C | 0.830119  | 1.120702  | -0.000013 |
| H | -1.204573 | 1.689854  | -0.000110 |
| H | 0.887347  | -1.703817 | -0.000234 |
| H | 2.735226  | -1.781900 | -0.000054 |
| H | 2.910066  | 0.588680  | 0.000070  |
| H | 1.105504  | 2.166181  | -0.000163 |
| O | -1.008445 | -0.362401 | -0.000028 |
| C | -2.429947 | -0.416959 | 0.000045  |
| H | -2.704248 | -1.467038 | -0.000291 |
| H | -2.831011 | 0.065937  | 0.891745  |
| H | -2.831131 | 0.066524  | -0.891289 |

Z-OMe-Dichloromethane  
SCF Energy: -270.497619347  
ZPE-corrected Energy: -270.378059  
 $\Delta U$ : -270.370934  
 $\Delta H$ : -270.369990  
 $\Delta G$ : -270.409421

Num. Imaginary Frequencies: 0

|   |           |           |           |
|---|-----------|-----------|-----------|
| C | -0.484354 | 0.876740  | 0.000097  |
| C | 1.833129  | -1.183808 | -0.000002 |
| C | 1.918244  | 0.149015  | -0.000010 |
| C | 0.830164  | 1.120175  | -0.000023 |
| H | -1.203862 | 1.689720  | 0.000056  |
| H | 0.886552  | -1.702453 | 0.000072  |
| H | 2.734448  | -1.782093 | -0.000157 |
| H | 2.910389  | 0.588666  | -0.000307 |
| H | 1.105081  | 2.165787  | -0.000211 |
| O | -1.009040 | -0.362777 | 0.000236  |
| C | -2.429433 | -0.416280 | -0.000155 |
| H | -2.704830 | -1.466147 | -0.000085 |
| H | -2.831234 | 0.066978  | 0.891295  |
| H | -2.830728 | 0.066703  | -0.891986 |

Z-OMe-DMSO

SCF Energy: -270.498422869

ZPE-corrected Energy: -270.378872

$\Delta U$ : -270.371756

$\Delta H$ : -270.370812

$\Delta G$ : -270.410179

Num. Imaginary Frequencies: 0

|   |           |           |           |
|---|-----------|-----------|-----------|
| C | -0.484826 | 0.877238  | -0.000038 |
| C | 1.833499  | -1.184229 | -0.000036 |
| C | 1.917832  | 0.149057  | 0.000131  |
| C | 0.830115  | 1.120750  | -0.000013 |
| H | -1.204638 | 1.689869  | -0.000125 |
| H | 0.887407  | -1.703936 | -0.000261 |
| H | 2.735283  | -1.781888 | -0.000046 |
| H | 2.910036  | 0.588674  | 0.000102  |
| H | 1.105546  | 2.166217  | -0.000161 |
| O | -1.008389 | -0.362367 | -0.000047 |
| C | -2.429985 | -0.417021 | 0.000061  |
| H | -2.704190 | -1.467119 | -0.000304 |
| H | -2.830992 | 0.065853  | 0.891775  |
| H | -2.831158 | 0.066502  | -0.891233 |

Z-OMe-Gas

SCF Energy: -270.493389715

ZPE-corrected Energy: -270.373708

$\Delta U$ : -270.366580

$\Delta H$ : -270.365636

$\Delta G$ : -270.405187

Num. Imaginary Frequencies: 0

|   |           |           |           |
|---|-----------|-----------|-----------|
| C | -0.482107 | 0.876166  | -0.000058 |
| C | 1.829469  | -1.182266 | -0.000064 |
| C | 1.919253  | 0.148224  | 0.000100  |
| C | 0.830284  | 1.118060  | -0.000039 |
| H | -1.201160 | 1.689934  | -0.000115 |
| H | 0.880953  | -1.696437 | -0.000359 |
| H | 2.728267  | -1.783818 | 0.000085  |
| H | 2.911503  | 0.586812  | 0.000349  |
| H | 1.103684  | 2.164118  | -0.000102 |
| O | -1.011440 | -0.364675 | -0.000009 |
| C | -2.424618 | -0.413541 | 0.000059  |
| H | -2.705678 | -1.462485 | -0.000057 |
| H | -2.829821 | 0.069595  | 0.891771  |
| H | -2.829912 | 0.069827  | -0.891484 |

Z-OMe-n-Hexane

SCF Energy: -270.495068959

ZPE-corrected Energy: -270.375437

$\Delta U$ : -270.368309

$\Delta H$ : -270.367365

$\Delta G$ : -270.406874

Num. Imaginary Frequencies: 0

|   |           |           |           |
|---|-----------|-----------|-----------|
| C | -0.482923 | 0.876113  | -0.000135 |
| C | 1.830941  | -1.182840 | -0.000086 |
| C | 1.918943  | 0.148555  | 0.000185  |
| C | 0.830297  | 1.118834  | -0.000051 |
| H | -1.202003 | 1.689729  | -0.000198 |
| H | 0.883038  | -1.698497 | -0.000614 |
| H | 2.730685  | -1.783208 | 0.000181  |
| H | 2.911176  | 0.587578  | 0.000671  |
| H | 1.104182  | 2.164739  | -0.000092 |
| O | -1.010532 | -0.363885 | -0.000180 |
| C | -2.426705 | -0.414465 | 0.000195  |
| H | -2.705559 | -1.463735 | -0.000425 |
| H | -2.830028 | 0.068050  | 0.892383  |
| H | -2.830547 | 0.069239  | -0.891117 |

Z-OMe-Water

SCF Energy: -270.498506175

ZPE-corrected Energy: -270.378956

$\Delta U$ : -270.371841

$\Delta H$ : -270.370897

$\Delta G$ : -270.410255

Num. Imaginary Frequencies: 0

|   |           |           |           |
|---|-----------|-----------|-----------|
| C | -0.484874 | 0.877299  | -0.000052 |
| C | 1.833525  | -1.184276 | -0.000041 |
| C | 1.917784  | 0.149057  | 0.000145  |
| C | 0.830111  | 1.120813  | -0.000012 |
| H | -1.204724 | 1.689889  | -0.000145 |
| H | 0.887482  | -1.704093 | -0.000296 |
| H | 2.735354  | -1.781874 | -0.000035 |
| H | 2.909997  | 0.588663  | 0.000144  |
| H | 1.105601  | 2.166264  | -0.000158 |
| O | -1.008314 | -0.362323 | -0.000070 |
| C | -2.430033 | -0.417103 | 0.000080  |
| H | -2.704110 | -1.467226 | -0.000319 |
| H | -2.830967 | 0.065745  | 0.891810  |
| H | -2.831191 | 0.066469  | -0.891164 |

Z-trans-CHO-Acetone  
SCF Energy: -269.300336649  
ZPE-corrected Energy: -269.204125  
 $\Delta U$ : -269.197907  
 $\Delta H$ : -269.196963  
 $\Delta G$ : -269.234030

Num. Imaginary Frequencies: 0

|   |           |           |           |
|---|-----------|-----------|-----------|
| C | -0.598676 | 0.919753  | -0.147645 |
| C | 1.776844  | -1.107300 | -0.254180 |
| C | 1.741581  | 0.119339  | 0.258352  |
| C | 0.722748  | 1.120979  | -0.057797 |
| H | -1.252316 | 1.727634  | -0.453160 |
| H | 1.036035  | -1.442177 | -0.969688 |
| H | 2.568351  | -1.798079 | 0.001935  |
| H | 2.545773  | 0.448563  | 0.907762  |
| H | 1.094563  | 2.125067  | -0.236211 |
| C | -1.272325 | -0.329630 | 0.218641  |
| O | -2.442752 | -0.541015 | -0.014994 |
| H | -0.671419 | -1.071734 | 0.765091  |

Z-trans-CHO-Acetonitrile  
SCF Energy: -269.300575263  
ZPE-corrected Energy: -269.204366  
 $\Delta U$ : -269.198149  
 $\Delta H$ : -269.197205  
 $\Delta G$ : -269.234270

Num. Imaginary Frequencies: 0

|   |           |           |           |
|---|-----------|-----------|-----------|
| C | -0.598746 | 0.919709  | -0.147869 |
| C | 1.776756  | -1.107311 | -0.254170 |
| C | 1.741531  | 0.119339  | 0.258433  |
| C | 0.722748  | 1.120941  | -0.057715 |
| H | -1.252194 | 1.727753  | -0.453402 |
| H | 1.035942  | -1.442219 | -0.969666 |
| H | 2.568339  | -1.798034 | 0.001868  |
| H | 2.545761  | 0.448693  | 0.907704  |
| H | 1.094523  | 2.125084  | -0.235812 |
| C | -1.272062 | -0.329532 | 0.218415  |
| O | -2.442832 | -0.541051 | -0.014714 |
| H | -0.671079 | -1.071751 | 0.764466  |

Z-trans-CHO-Dichloromethane  
SCF Energy: -269.299647767  
ZPE-corrected Energy: -269.203430  
 $\Delta U$ : -269.197211  
 $\Delta H$ : -269.196267  
 $\Delta G$ : -269.233340

Num. Imaginary Frequencies: 0

|   |           |           |           |
|---|-----------|-----------|-----------|
| C | -0.598454 | 0.919892  | -0.146985 |
| C | 1.777024  | -1.107305 | -0.254198 |
| C | 1.741736  | 0.119327  | 0.258087  |
| C | 0.722776  | 1.121095  | -0.058033 |
| H | -1.252625 | 1.727334  | -0.452428 |
| H | 1.036154  | -1.442087 | -0.969663 |
| H | 2.568294  | -1.798269 | 0.002118  |
| H | 2.545866  | 0.448165  | 0.907839  |
| H | 1.094718  | 2.125021  | -0.237343 |
| C | -1.273073 | -0.329894 | 0.219310  |
| O | -2.442507 | -0.540898 | -0.015818 |
| H | -0.672407 | -1.071661 | 0.766939  |

Z-trans-CHO-DMSO  
SCF Energy: -269.300653159  
ZPE-corrected Energy: -269.204445  
 $\Delta U$ : -269.198228  
 $\Delta H$ : -269.197284  
 $\Delta G$ : -269.234348

Num. Imaginary Frequencies: 0

|   |           |           |           |
|---|-----------|-----------|-----------|
| C | -0.598768 | 0.919696  | -0.147942 |
| C | 1.776724  | -1.107316 | -0.254167 |
| C | 1.741515  | 0.119338  | 0.258458  |
| C | 0.722749  | 1.120929  | -0.057688 |
| H | -1.252153 | 1.727794  | -0.453480 |
| H | 1.035905  | -1.442234 | -0.969656 |
| H | 2.568331  | -1.798022 | 0.001846  |
| H | 2.545760  | 0.448734  | 0.907681  |
| H | 1.094511  | 2.125090  | -0.235682 |
| C | -1.271975 | -0.329499 | 0.218342  |
| O | -2.442857 | -0.541062 | -0.014624 |
| H | -0.670968 | -1.071755 | 0.764264  |

Z-trans-CHO-Gas

SCF Energy: -269.293493082

ZPE-corrected Energy: -269.197291

$\Delta U$ : -269.191049

$\Delta H$ : -269.190105

$\Delta G$ : -269.227258

Num. Imaginary Frequencies: 0

|   |           |           |           |
|---|-----------|-----------|-----------|
| C | -0.595661 | 0.920603  | -0.140483 |
| C | 1.776595  | -1.108381 | -0.253665 |
| C | 1.744025  | 0.119139  | 0.254348  |
| C | 0.723997  | 1.122245  | -0.059964 |
| H | -1.253994 | 1.725353  | -0.444180 |
| H | 1.031736  | -1.442846 | -0.964866 |
| H | 2.565683  | -1.801392 | 0.003494  |
| H | 2.549796  | 0.445057  | 0.904017  |
| H | 1.096807  | 2.124860  | -0.246250 |
| C | -1.279453 | -0.332438 | 0.225221  |
| O | -2.440626 | -0.538213 | -0.023469 |
| H | -0.682037 | -1.072335 | 0.782798  |

Z-trans-CHO-n-Hexane

SCF Energy: -269.296116865

ZPE-corrected Energy: -269.199896

$\Delta U$ : -269.193667

$\Delta H$ : -269.192723

$\Delta G$ : -269.229833

Num. Imaginary Frequencies: 0

|   |           |           |           |
|---|-----------|-----------|-----------|
| C | -0.596818 | 0.920882  | -0.143174 |
| C | 1.775979  | -1.108170 | -0.254049 |
| C | 1.742773  | 0.118930  | 0.255926  |
| C | 0.723578  | 1.121889  | -0.059177 |
| H | -1.253429 | 1.726613  | -0.447784 |
| H | 1.032830  | -1.442443 | -0.967249 |
| H | 2.565537  | -1.800796 | 0.002922  |
| H | 2.547816  | 0.445585  | 0.905949  |
| H | 1.096398  | 2.124861  | -0.242913 |
| C | -1.276366 | -0.330856 | 0.222995  |
| O | -2.440838 | -0.539862 | -0.020356 |
| H | -0.677327 | -1.070978 | 0.776797  |



Z-trans-CHO-Water

SCF Energy: -269.300754585

ZPE-corrected Energy: -269.204548

$\Delta U$ : -269.198331

$\Delta H$ : -269.197387

$\Delta G$ : -269.234451

Num. Imaginary Frequencies: 0

|   |           |           |           |
|---|-----------|-----------|-----------|
| C | -0.598796 | 0.919679  | -0.148036 |
| C | 1.776679  | -1.107323 | -0.254162 |
| C | 1.741494  | 0.119336  | 0.258489  |
| C | 0.722752  | 1.120913  | -0.057653 |
| H | -1.252097 | 1.727848  | -0.453580 |
| H | 1.035852  | -1.442255 | -0.969640 |
| H | 2.568317  | -1.798009 | 0.001816  |
| H | 2.545760  | 0.448786  | 0.907648  |
| H | 1.094497  | 2.125098  | -0.235511 |
| C | -1.271861 | -0.329455 | 0.218247  |
| O | -2.442889 | -0.541076 | -0.014507 |
| H | -0.670824 | -1.071758 | 0.764003  |

Z-trans-COMe-Acetone

SCF Energy: -308.614198362

ZPE-corrected Energy: -308.490186

$\Delta U$ : -308.482427

$\Delta H$ : -308.481483

$\Delta G$ : -308.522612

Num. Imaginary Frequencies: 0

|   |           |           |           |
|---|-----------|-----------|-----------|
| C | -0.289854 | 1.203842  | 0.119494  |
| C | 1.803055  | -0.947991 | -0.725350 |
| C | 1.920895  | 0.016818  | 0.180665  |
| C | 1.039196  | 1.184001  | 0.249462  |
| H | -0.796214 | 2.160815  | 0.066398  |
| H | 1.027198  | -0.917513 | -1.481262 |
| H | 2.490162  | -1.782664 | -0.751854 |
| H | 2.750102  | -0.003169 | 0.880085  |
| H | 1.539232  | 2.138022  | 0.385494  |
| C | -1.215643 | 0.046948  | -0.008356 |
| O | -2.210117 | 0.168309  | -0.695963 |
| C | -0.995480 | -1.222026 | 0.780551  |
| H | -0.813389 | -2.048977 | 0.095285  |
| H | -0.168299 | -1.149839 | 1.478968  |
| H | -1.920872 | -1.432705 | 1.315798  |

Z-trans-COMe-Acetonitrile  
SCF Energy: -308.614446883  
ZPE-corrected Energy: -308.490433  
 $\Delta U$ : -308.482679  
 $\Delta H$ : -308.481735  
 $\Delta G$ : -308.522846

Num. Imaginary Frequencies: 0

|   |           |           |           |
|---|-----------|-----------|-----------|
| C | -0.290507 | 1.203474  | 0.118854  |
| C | 1.804650  | -0.947232 | -0.724934 |
| C | 1.921184  | 0.017772  | 0.181072  |
| C | 1.038585  | 1.184267  | 0.249196  |
| H | -0.797063 | 2.160341  | 0.065499  |
| H | 1.029081  | -0.917668 | -1.481183 |
| H | 2.492520  | -1.781288 | -0.750992 |
| H | 2.750033  | -0.001281 | 0.880918  |
| H | 1.537930  | 2.138650  | 0.385205  |
| C | -1.215967 | 0.046527  | -0.008222 |
| O | -2.211931 | 0.168337  | -0.694064 |
| C | -0.994433 | -1.223134 | 0.778904  |
| H | -0.811210 | -2.048935 | 0.092529  |
| H | -0.167356 | -1.150914 | 1.477410  |
| H | -1.919547 | -1.435643 | 1.313906  |

Z-trans-COMe-Dichloromethane  
SCF Energy: -308.613485384  
ZPE-corrected Energy: -308.489480  
 $\Delta U$ : -308.481705  
 $\Delta H$ : -308.480761  
 $\Delta G$ : -308.521971

Num. Imaginary Frequencies: 0

|   |           |           |           |
|---|-----------|-----------|-----------|
| C | -0.287943 | 1.204881  | 0.121281  |
| C | 1.798472  | -0.950209 | -0.726497 |
| C | 1.920103  | 0.014080  | 0.179490  |
| C | 1.040985  | 1.183220  | 0.250228  |
| H | -0.793722 | 2.162167  | 0.068930  |
| H | 1.021732  | -0.917171 | -1.481379 |
| H | 2.483376  | -1.786652 | -0.754267 |
| H | 2.750361  | -0.008568 | 0.877651  |
| H | 1.542994  | 2.136194  | 0.386375  |
| C | -1.214701 | 0.048175  | -0.008756 |
| O | -2.204907 | 0.168274  | -0.701386 |
| C | -0.998559 | -1.218828 | 0.785256  |
| H | -0.819773 | -2.049061 | 0.103168  |
| H | -0.171094 | -1.146822 | 1.483430  |
| H | -1.924758 | -1.424193 | 1.321171  |

Z-trans-COMe-DMSO

SCF Energy: -308.614528197

ZPE-corrected Energy: -308.490515

$\Delta U$ : -308.482762

$\Delta H$ : -308.481818

$\Delta G$ : -308.522923

Num. Imaginary Frequencies: 0

|   |           |           |           |
|---|-----------|-----------|-----------|
| C | -0.290717 | 1.203354  | 0.118645  |
| C | 1.805163  | -0.946990 | -0.724797 |
| C | 1.921280  | 0.018080  | 0.181203  |
| C | 1.038390  | 1.184352  | 0.249109  |
| H | -0.797335 | 2.160187  | 0.065207  |
| H | 1.029682  | -0.917727 | -1.481150 |
| H | 2.493279  | -1.780847 | -0.750710 |
| H | 2.750017  | -0.000668 | 0.881181  |
| H | 1.537511  | 2.138853  | 0.385112  |
| C | -1.216071 | 0.046392  | -0.008178 |
| O | -2.212517 | 0.168349  | -0.693449 |
| C | -0.994099 | -1.223491 | 0.778369  |
| H | -0.810526 | -2.048921 | 0.091635  |
| H | -0.167049 | -1.151270 | 1.476899  |
| H | -1.919120 | -1.436582 | 1.313301  |

Z-trans-COMe-Gas

SCF Energy: -308.607312588

ZPE-corrected Energy: -308.483295

$\Delta U$ : -308.475451

$\Delta H$ : -308.474507

$\Delta G$ : -308.516089

Num. Imaginary Frequencies: 0

|   |           |           |           |
|---|-----------|-----------|-----------|
| C | -0.265038 | 1.214419  | 0.137784  |
| C | 1.747026  | -0.980946 | -0.731548 |
| C | 1.915485  | -0.014749 | 0.164443  |
| C | 1.063016  | 1.173231  | 0.255929  |
| H | -0.762711 | 2.176321  | 0.096897  |
| H | 0.953123  | -0.931023 | -1.467289 |
| H | 2.409535  | -1.834690 | -0.771182 |
| H | 2.762542  | -0.057832 | 0.841527  |
| H | 1.584584  | 2.114969  | 0.396367  |
| C | -1.202767 | 0.062407  | -0.014404 |
| O | -2.145726 | 0.169736  | -0.761990 |
| C | -1.039309 | -1.179436 | 0.836319  |
| H | -0.948950 | -2.051712 | 0.190997  |
| H | -0.185379 | -1.131388 | 1.504346  |
| H | -1.957408 | -1.292085 | 1.413115  |

Z-trans-COMe-n-Hexane  
SCF Energy: -308.609912919  
ZPE-corrected Energy: -308.485957  
 $\Delta U$ : -308.478091  
 $\Delta H$ : -308.477146  
 $\Delta G$ : -308.519039

Num. Imaginary Frequencies: 0

|   |           |           |           |
|---|-----------|-----------|-----------|
| C | -0.271671 | 1.211774  | 0.133391  |
| C | 1.761132  | -0.972524 | -0.730935 |
| C | 1.916785  | -0.006948 | 0.168278  |
| C | 1.056778  | 1.175706  | 0.254675  |
| H | -0.771290 | 2.172606  | 0.089549  |
| H | 0.971978  | -0.927385 | -1.472142 |
| H | 2.430213  | -1.821297 | -0.767788 |
| H | 2.759537  | -0.044055 | 0.850918  |
| H | 1.572777  | 2.120589  | 0.394488  |
| C | -1.205409 | 0.058428  | -0.012871 |
| O | -2.161886 | 0.168425  | -0.746811 |
| C | -1.028117 | -1.189274 | 0.823880  |
| H | -0.921535 | -2.053276 | 0.169747  |
| H | -0.177198 | -1.136023 | 1.495075  |
| H | -1.946379 | -1.321532 | 1.396137  |

Z-trans-COMe-Water  
SCF Energy: -308.614634213  
ZPE-corrected Energy: -308.490621  
 $\Delta U$ : -308.482870  
 $\Delta H$ : -308.481926  
 $\Delta G$ : -308.523026

Num. Imaginary Frequencies: 0

|   |           |           |           |
|---|-----------|-----------|-----------|
| C | -0.290983 | 1.203200  | 0.118375  |
| C | 1.805818  | -0.946681 | -0.724620 |
| C | 1.921405  | 0.018474  | 0.181369  |
| C | 1.038142  | 1.184460  | 0.249000  |
| H | -0.797678 | 2.159992  | 0.064829  |
| H | 1.030446  | -0.917807 | -1.481102 |
| H | 2.494248  | -1.780284 | -0.750348 |
| H | 2.750000  | 0.000118  | 0.881515  |
| H | 1.536975  | 2.139109  | 0.385001  |
| C | -1.216200 | 0.046219  | -0.008123 |
| O | -2.213268 | 0.168365  | -0.692661 |
| C | -0.993674 | -1.223945 | 0.777687  |
| H | -0.809667 | -2.048906 | 0.090494  |
| H | -0.166655 | -1.151729 | 1.476240  |
| H | -1.918573 | -1.437770 | 1.312536  |

Z-trans-COOH-Acetone  
SCF Energy: -344.562287142  
ZPE-corrected Energy: -344.460769  
 $\Delta U$ : -344.453602  
 $\Delta H$ : -344.452658  
 $\Delta G$ : -344.492951

Num. Imaginary Frequencies: 0

|   |           |           |           |
|---|-----------|-----------|-----------|
| C | 0.321411  | 1.175904  | -0.032770 |
| C | -1.851635 | -1.012587 | 0.616961  |
| C | -1.928949 | 0.043066  | -0.183639 |
| C | -1.007914 | 1.182570  | -0.138655 |
| H | 0.847925  | 2.111766  | 0.099129  |
| H | -1.064694 | -1.103800 | 1.355815  |
| H | -2.580855 | -1.809448 | 0.566770  |
| H | -2.761410 | 0.134298  | -0.873117 |
| H | -1.483747 | 2.158204  | -0.165247 |
| C | 1.229262  | 0.004725  | -0.023020 |
| O | 2.246704  | -0.024059 | 0.625928  |
| O | 0.870415  | -0.995516 | -0.833872 |
| H | 1.532777  | -1.696481 | -0.753052 |

Z-trans-COOH-Acetonitrile  
SCF Energy: -344.562571943  
ZPE-corrected Energy: -344.461068  
 $\Delta U$ : -344.453898  
 $\Delta H$ : -344.452954  
 $\Delta G$ : -344.493261

Num. Imaginary Frequencies: 0

|   |           |           |           |
|---|-----------|-----------|-----------|
| C | 0.320454  | 1.176256  | -0.033201 |
| C | -1.849363 | -1.014456 | 0.616743  |
| C | -1.929128 | 0.042032  | -0.182610 |
| C | -1.008950 | 1.182260  | -0.138486 |
| H | 0.846535  | 2.112477  | 0.098092  |
| H | -1.060994 | -1.105933 | 1.354061  |
| H | -2.578042 | -1.811850 | 0.567017  |
| H | -2.763045 | 0.133281  | -0.870330 |
| H | -1.485277 | 2.157603  | -0.165468 |
| C | 1.228658  | 0.005334  | -0.022991 |
| O | 2.244147  | -0.024472 | 0.629175  |
| O | 0.872908  | -0.992950 | -0.837239 |
| H | 1.534364  | -1.694758 | -0.755590 |

Z-trans-COOH-Dichloromethane  
SCF Energy: -344.561467475  
ZPE-corrected Energy: -344.459915  
 $\Delta U$ : -344.452751  
 $\Delta H$ : -344.451807  
 $\Delta G$ : -344.492091

Num. Imaginary Frequencies: 0

|   |           |           |           |
|---|-----------|-----------|-----------|
| C | 0.322938  | 1.175077  | -0.031993 |
| C | -1.855871 | -1.009153 | 0.617175  |
| C | -1.928799 | 0.045075  | -0.185451 |
| C | -1.006206 | 1.183237  | -0.138922 |
| H | 0.850455  | 2.110182  | 0.100948  |
| H | -1.071481 | -1.099897 | 1.358744  |
| H | -2.585847 | -1.805213 | 0.565766  |
| H | -2.758501 | 0.136072  | -0.878292 |
| H | -1.480831 | 2.159530  | -0.165227 |
| C | 1.230536  | 0.003602  | -0.022878 |
| O | 2.251715  | -0.022824 | 0.619343  |
| O | 0.865831  | -1.000690 | -0.827121 |
| H | 1.530251  | -1.699589 | -0.747293 |

Z-trans-COOH-DMSO  
SCF Energy: -344.562665099  
ZPE-corrected Energy: -344.461165  
 $\Delta U$ : -344.453995  
 $\Delta H$ : -344.453050  
 $\Delta G$ : -344.493356

Num. Imaginary Frequencies: 0

|   |           |           |           |
|---|-----------|-----------|-----------|
| C | 0.320504  | 1.176271  | -0.033223 |
| C | -1.849364 | -1.014539 | 0.616629  |
| C | -1.929157 | 0.042113  | -0.182532 |
| C | -1.008923 | 1.182310  | -0.138391 |
| H | 0.846599  | 2.112519  | 0.097867  |
| H | -1.060919 | -1.106259 | 1.353834  |
| H | -2.578154 | -1.811833 | 0.566856  |
| H | -2.763185 | 0.133570  | -0.870092 |
| H | -1.485201 | 2.157669  | -0.165385 |
| C | 1.228656  | 0.005319  | -0.023046 |
| O | 2.244182  | -0.024488 | 0.629164  |
| O | 0.872868  | -0.992957 | -0.837179 |
| H | 1.534164  | -1.694950 | -0.755590 |

Z-trans-COOH-Gas

SCF Energy: -344.554227697

ZPE-corrected Energy: -344.452485

$\Delta U$ : -344.445275

$\Delta H$ : -344.444330

$\Delta G$ : -344.485112

Num. Imaginary Frequencies: 0

|   |           |           |           |
|---|-----------|-----------|-----------|
| C | 0.348974  | 1.158850  | -0.012939 |
| C | -1.931053 | -0.968159 | 0.590794  |
| C | -1.938015 | 0.089493  | -0.208502 |
| C | -0.978608 | 1.195077  | -0.131548 |
| H | 0.891771  | 2.083250  | 0.130712  |
| H | -1.170496 | -1.093154 | 1.350953  |
| H | -2.690218 | -1.734124 | 0.514540  |
| H | -2.743271 | 0.212651  | -0.925060 |
| H | -1.427264 | 2.184477  | -0.149477 |
| C | 1.253763  | -0.015027 | -0.020340 |
| O | 2.336267  | 0.000221  | 0.502243  |
| O | 0.803015  | -1.082670 | -0.699899 |
| H | 1.494856  | -1.754908 | -0.645215 |

Z-trans-COOH-n-Hexane

SCF Energy: -344.557300889

ZPE-corrected Energy: -344.455621

$\Delta U$ : -344.448447

$\Delta H$ : -344.447503

$\Delta G$ : -344.487933

Num. Imaginary Frequencies: 0

|   |           |           |           |
|---|-----------|-----------|-----------|
| C | 0.330193  | 1.170842  | -0.028261 |
| C | -1.876748 | -0.994570 | 0.614539  |
| C | -1.929850 | 0.056301  | -0.192879 |
| C | -0.998186 | 1.186707  | -0.138980 |
| H | 0.862755  | 2.102353  | 0.108580  |
| H | -1.101897 | -1.088331 | 1.365379  |
| H | -2.612300 | -1.784902 | 0.556889  |
| H | -2.749242 | 0.150246  | -0.897571 |
| H | -1.466286 | 2.166508  | -0.163336 |
| C | 1.237384  | -0.001618 | -0.022092 |
| O | 2.276121  | -0.015834 | 0.586509  |
| O | 0.845108  | -1.026383 | -0.792420 |
| H | 1.520382  | -1.714114 | -0.716618 |

Z-trans-COOH-Water  
SCF Energy: -344.562786461  
ZPE-corrected Energy: -344.461291  
 $\Delta U$ : -344.454121  
 $\Delta H$ : -344.453176  
 $\Delta G$ : -344.493478

Num. Imaginary Frequencies: 0

|   |           |           |           |
|---|-----------|-----------|-----------|
| C | 0.320374  | 1.176357  | -0.033324 |
| C | -1.848958 | -1.014930 | 0.616535  |
| C | -1.929206 | 0.041958  | -0.182308 |
| C | -1.009082 | 1.182261  | -0.138316 |
| H | 0.846375  | 2.112694  | 0.097564  |
| H | -1.060193 | -1.106852 | 1.353376  |
| H | -2.577734 | -1.812248 | 0.566858  |
| H | -2.763575 | 0.133561  | -0.869433 |
| H | -1.485457 | 2.157563  | -0.165330 |
| C | 1.228536  | 0.005428  | -0.023087 |
| O | 2.243684  | -0.024606 | 0.629835  |
| O | 0.873343  | -0.992450 | -0.837821 |
| H | 1.534379  | -1.694712 | -0.756144 |



## Transition states

TS-con-in-3-CF3-Acetone  
SCF Energy: -492.991413139  
ZPE-corrected Energy: -492.901112  
 $\Delta U$ : -492.894390  
 $\Delta H$ : -492.893446  
 $\Delta G$ : -492.932415

Num. Imaginary Frequencies: 1

Imaginary Frequency: -664.4875

|   |           |           |           |
|---|-----------|-----------|-----------|
| C | 0.285177  | 0.608665  | -0.763966 |
| C | 1.582732  | -1.063654 | -0.323738 |
| C | 2.056724  | 0.042365  | 0.411925  |
| C | 1.435538  | 1.137457  | -0.140999 |
| H | -0.121151 | 1.043705  | -1.677240 |
| H | 1.693416  | -1.060829 | -1.396691 |
| H | 1.442785  | -2.047106 | 0.119859  |
| H | 2.702000  | -0.011432 | 1.279649  |
| H | 1.763453  | 2.167072  | -0.190677 |
| C | -0.851840 | 0.007903  | 0.007306  |
| F | -0.576760 | -0.403216 | 1.246063  |
| F | -1.424077 | -1.026430 | -0.637331 |
| F | -1.835886 | 0.930999  | 0.138149  |

TS-con-in-3-CF3-Acetonitrile  
SCF Energy: -492.991538580  
ZPE-corrected Energy: -492.901251  
 $\Delta U$ : -492.894528  
 $\Delta H$ : -492.893584  
 $\Delta G$ : -492.932555

Num. Imaginary Frequencies: 1

Imaginary Frequency: -664.4987

|   |           |           |           |
|---|-----------|-----------|-----------|
| C | 0.285228  | 0.608627  | -0.764046 |
| C | 1.582883  | -1.063692 | -0.323675 |
| C | 2.056807  | 0.042409  | 0.411967  |
| C | 1.435533  | 1.137472  | -0.140931 |
| H | -0.120936 | 1.043523  | -1.677439 |
| H | 1.693433  | -1.060786 | -1.396652 |
| H | 1.443297  | -2.047206 | 0.119906  |
| H | 2.702385  | -0.011356 | 1.279471  |
| H | 1.763413  | 2.167088  | -0.190729 |
| C | -0.851653 | 0.007943  | 0.007141  |
| F | -0.576922 | -0.403078 | 1.246113  |
| F | -1.424183 | -1.026508 | -0.637216 |
| F | -1.836048 | 0.930939  | 0.138071  |

TS-con-in-3-CF3-Dichloromethane  
SCF Energy: -492.991050048  
ZPE-corrected Energy: -492.900711  
 $\Delta U$ : -492.893991  
 $\Delta H$ : -492.893047  
 $\Delta G$ : -492.932012

Num. Imaginary Frequencies: 1

Imaginary Frequency: -664.4678

|   |           |           |           |
|---|-----------|-----------|-----------|
| C | 0.285034  | 0.608792  | -0.763717 |
| C | 1.582283  | -1.063545 | -0.323923 |
| C | 2.056489  | 0.042221  | 0.411807  |
| C | 1.435564  | 1.137412  | -0.141181 |
| H | -0.121741 | 1.044228  | -1.676669 |
| H | 1.693322  | -1.060926 | -1.396809 |
| H | 1.441300  | -2.046824 | 0.119703  |
| H | 2.700919  | -0.011688 | 1.280141  |
| H | 1.763614  | 2.167011  | -0.190552 |
| C | -0.852386 | 0.007791  | 0.007773  |
| F | -0.576322 | -0.403517 | 1.245959  |
| F | -1.423697 | -1.026270 | -0.637616 |
| F | -1.835461 | 0.931140  | 0.138282  |

TS-con-in-3-CF3-DMSO  
SCF Energy: -492.991579499  
ZPE-corrected Energy: -492.901296  
 $\Delta U$ : -492.894573  
 $\Delta H$ : -492.893629  
 $\Delta G$ : -492.932601

Num. Imaginary Frequencies: 1

Imaginary Frequency: -664.5029

|   |           |           |           |
|---|-----------|-----------|-----------|
| C | 0.285244  | 0.608615  | -0.764072 |
| C | 1.582932  | -1.063704 | -0.323655 |
| C | 2.056834  | 0.042423  | 0.411980  |
| C | 1.435531  | 1.137477  | -0.140908 |
| H | -0.120864 | 1.043463  | -1.677504 |
| H | 1.693437  | -1.060771 | -1.396640 |
| H | 1.443463  | -2.047239 | 0.119920  |
| H | 2.702512  | -0.011332 | 1.279412  |
| H | 1.763402  | 2.167093  | -0.190748 |
| C | -0.851592 | 0.007956  | 0.007087  |
| F | -0.576976 | -0.403029 | 1.246132  |
| F | -1.424214 | -1.026536 | -0.637176 |
| F | -1.836104 | 0.930918  | 0.138041  |

TS-con-in-3-CF3-Gas

SCF Energy: -492.987697697

ZPE-corrected Energy: -492.897061

$\Delta U$ : -492.890356

$\Delta H$ : -492.889411

$\Delta G$ : -492.928360

Num. Imaginary Frequencies: 1

Imaginary Frequency: -664.9740

|   |           |           |           |
|---|-----------|-----------|-----------|
| C | 0.283771  | 0.611022  | -0.760624 |
| C | 1.577213  | -1.062503 | -0.325926 |
| C | 2.054449  | 0.040064  | 0.410837  |
| C | 1.436249  | 1.136994  | -0.142009 |
| H | -0.125823 | 1.049301  | -1.671385 |
| H | 1.690094  | -1.060402 | -1.398368 |
| H | 1.426785  | -2.044535 | 0.117111  |
| H | 2.692748  | -0.016022 | 1.283494  |
| H | 1.767612  | 2.165681  | -0.190651 |
| C | -0.857583 | 0.006861  | 0.011639  |
| F | -0.573275 | -0.403798 | 1.246164  |
| F | -1.417769 | -1.026412 | -0.639150 |
| F | -1.832957 | 0.931471  | 0.137018  |

TS-con-in-3-CF3-n-Hexane  
SCF Energy: -492.989155995  
ZPE-corrected Energy: -492.898638  
 $\Delta U$ : -492.891928  
 $\Delta H$ : -492.890983  
 $\Delta G$ : -492.929937

Num. Imaginary Frequencies: 1

Imaginary Frequency: -664.6241

|   |           |           |           |
|---|-----------|-----------|-----------|
| C | 0.284313  | 0.609833  | -0.762121 |
| C | 1.579635  | -1.062962 | -0.324989 |
| C | 2.055324  | 0.041169  | 0.411243  |
| C | 1.435860  | 1.137179  | -0.141812 |
| H | -0.124281 | 1.046990  | -1.673716 |
| H | 1.691970  | -1.060878 | -1.397591 |
| H | 1.433347  | -2.045488 | 0.118453  |
| H | 2.695963  | -0.013749 | 1.282278  |
| H | 1.765384  | 2.166411  | -0.190394 |
| C | -0.855311 | 0.007241  | 0.010033  |
| F | -0.574475 | -0.403966 | 1.245931  |
| F | -1.420715 | -1.026169 | -0.638586 |
| F | -1.833843 | 0.931463  | 0.137860  |

TS-con-in-3-CF3-Water  
SCF Energy: -492.991632756  
ZPE-corrected Energy: -492.901355  
 $\Delta U$ : -492.894632  
 $\Delta H$ : -492.893687  
 $\Delta G$ : -492.932661

Num. Imaginary Frequencies: 1

Imaginary Frequency: -664.5087

|   |           |           |           |
|---|-----------|-----------|-----------|
| C | 0.285266  | 0.608601  | -0.764105 |
| C | 1.582994  | -1.063720 | -0.323629 |
| C | 2.056869  | 0.042441  | 0.411998  |
| C | 1.435530  | 1.137484  | -0.140878 |
| H | -0.120770 | 1.043385  | -1.677589 |
| H | 1.693441  | -1.060750 | -1.396624 |
| H | 1.443680  | -2.047283 | 0.119938  |
| H | 2.702679  | -0.011303 | 1.279335  |
| H | 1.763389  | 2.167099  | -0.190772 |
| C | -0.851513 | 0.007973  | 0.007016  |
| F | -0.577048 | -0.402961 | 1.246157  |
| F | -1.424252 | -1.026575 | -0.637123 |
| F | -1.836177 | 0.930890  | 0.137999  |

TS-con-in-3-CHO-Acetone  
SCF Energy: -269.240925332  
ZPE-corrected Energy: -269.145782  
 $\Delta U$ : -269.140536  
 $\Delta H$ : -269.139592  
 $\Delta G$ : -269.174460

Num. Imaginary Frequencies: 1

Imaginary Frequency: -586.6634

|   |           |           |           |
|---|-----------|-----------|-----------|
| C | -0.158291 | -0.726966 | 0.439542  |
| C | 0.867524  | 1.145434  | 0.401218  |
| C | 1.661825  | 0.237545  | -0.354584 |
| C | 1.147783  | -0.992522 | -0.066556 |
| H | -0.601637 | -1.289709 | 1.259501  |
| H | 0.828431  | 1.030414  | 1.474397  |
| H | 0.608311  | 2.139826  | 0.045316  |
| H | 2.439199  | 0.512694  | -1.054962 |
| H | 1.596852  | -1.971380 | -0.163691 |
| C | -1.138403 | -0.007716 | -0.376569 |
| O | -2.299192 | 0.164315  | -0.057787 |
| H | -0.760245 | 0.328988  | -1.356583 |

TS-con-in-3-CHO-Acetonitrile  
SCF Energy: -269.241220701  
ZPE-corrected Energy: -269.146078  
 $\Delta U$ : -269.140833  
 $\Delta H$ : -269.139889  
 $\Delta G$ : -269.174755

Num. Imaginary Frequencies: 1

Imaginary Frequency: -585.9618

|   |           |           |           |
|---|-----------|-----------|-----------|
| C | -0.158088 | -0.727829 | 0.439100  |
| C | 0.865693  | 1.145659  | 0.401147  |
| C | 1.661698  | 0.238420  | -0.353930 |
| C | 1.148560  | -0.992049 | -0.066624 |
| H | -0.600896 | -1.290825 | 1.259158  |
| H | 0.826174  | 1.030892  | 1.474354  |
| H | 0.605768  | 2.139679  | 0.044761  |
| H | 2.439597  | 0.514414  | -1.053366 |
| H | 1.598207  | -1.970568 | -0.164326 |
| C | -1.137610 | -0.008344 | -0.376581 |
| O | -2.298832 | 0.164119  | -0.057833 |
| H | -0.759709 | 0.328310  | -1.356586 |

TS-con-in-3-CHO-Dichloromethane

SCF Energy: -269.240075509

ZPE-corrected Energy: -269.144933

$\Delta U$ : -269.139686

$\Delta H$ : -269.138742

$\Delta G$ : -269.173613

Num. Imaginary Frequencies: 1

Imaginary Frequency: -588.6293

|   |           |           |           |
|---|-----------|-----------|-----------|
| C | -0.158498 | -0.725078 | 0.440362  |
| C | 0.871316  | 1.144839  | 0.401406  |
| C | 1.662291  | 0.235948  | -0.355909 |
| C | 1.146516  | -0.993460 | -0.066234 |
| H | -0.603198 | -1.287806 | 1.259672  |
| H | 0.833025  | 1.029587  | 1.474535  |
| H | 0.612846  | 2.139719  | 0.046193  |
| H | 2.438220  | 0.509776  | -1.058485 |
| H | 1.594429  | -1.972960 | -0.162672 |
| C | -1.140566 | -0.006519 | -0.376738 |
| O | -2.299969 | 0.164681  | -0.057440 |
| H | -0.761930 | 0.329867  | -1.357051 |

TS-con-in-3-CHO-DMSO

SCF Energy: -269.241317247

ZPE-corrected Energy: -269.146174

$\Delta U$ : -269.140930

$\Delta H$ : -269.139986

$\Delta G$ : -269.174851

Num. Imaginary Frequencies: 1

Imaginary Frequency: -585.7300

|   |           |           |           |
|---|-----------|-----------|-----------|
| C | -0.158021 | -0.728116 | 0.438954  |
| C | 0.865091  | 1.145735  | 0.401122  |
| C | 1.661653  | 0.238707  | -0.353715 |
| C | 1.148812  | -0.991893 | -0.066647 |
| H | -0.600654 | -1.291193 | 1.259046  |
| H | 0.825432  | 1.031050  | 1.474339  |
| H | 0.604936  | 2.139633  | 0.044577  |
| H | 2.439734  | 0.514976  | -1.052831 |
| H | 1.598649  | -1.970300 | -0.164538 |
| C | -1.137348 | -0.008549 | -0.376585 |
| O | -2.298712 | 0.164056  | -0.057848 |
| H | -0.759528 | 0.328088  | -1.356585 |

TS-con-in-3-CHO-Gas  
SCF Energy: -269.232626053  
ZPE-corrected Energy: -269.137512  
 $\Delta U$ : -269.132245  
 $\Delta H$ : -269.131300  
 $\Delta G$ : -269.166230

Num. Imaginary Frequencies: 1

Imaginary Frequency: -603.9854

|   |           |           |           |
|---|-----------|-----------|-----------|
| C | -0.162984 | -0.705150 | 0.449314  |
| C | 0.912878  | 1.138857  | 0.402903  |
| C | 1.665201  | 0.215714  | -0.370112 |
| C | 1.128426  | -1.004078 | -0.064956 |
| H | -0.620422 | -1.261174 | 1.266820  |
| H | 0.885812  | 1.017995  | 1.475349  |
| H | 0.672064  | 2.141933  | 0.057606  |
| H | 2.429252  | 0.470743  | -1.092930 |
| H | 1.564462  | -1.990601 | -0.146588 |
| C | -1.158626 | 0.009283  | -0.377252 |
| O | -2.308286 | 0.168014  | -0.055327 |
| H | -0.774254 | 0.349238  | -1.357023 |

TS-con-in-3-CHO-n-Hexane  
SCF Energy: -269.235775529  
ZPE-corrected Energy: -269.140638  
 $\Delta U$ : -269.135381  
 $\Delta H$ : -269.134437  
 $\Delta G$ : -269.169337

Num. Imaginary Frequencies: 1

Imaginary Frequency: -597.5732

|   |           |           |           |
|---|-----------|-----------|-----------|
| C | -0.161009 | -0.714315 | 0.445481  |
| C | 0.895006  | 1.141558  | 0.402656  |
| C | 1.663526  | 0.224784  | -0.364441 |
| C | 1.136374  | -0.999473 | -0.065417 |
| H | -0.612990 | -1.273598 | 1.263498  |
| H | 0.862832  | 1.022070  | 1.475304  |
| H | 0.646004  | 2.141464  | 0.054298  |
| H | 2.432169  | 0.488195  | -1.079182 |
| H | 1.577384  | -1.983070 | -0.153845 |
| C | -1.150835 | 0.002326  | -0.376895 |
| O | -2.304410 | 0.166897  | -0.056432 |
| H | -0.768484 | 0.340479  | -1.356921 |

TS-con-in-3-CHO-Water  
SCF Energy: -269.241443050  
ZPE-corrected Energy: -269.146300  
 $\Delta U$ : -269.141056  
 $\Delta H$ : -269.140112  
 $\Delta G$ : -269.174977

Num. Imaginary Frequencies: 1

Imaginary Frequency: -585.4265

|   |           |           |           |
|---|-----------|-----------|-----------|
| C | -0.157935 | -0.728492 | 0.438764  |
| C | 0.864305  | 1.145835  | 0.401090  |
| C | 1.661594  | 0.239082  | -0.353434 |
| C | 1.149142  | -0.991691 | -0.066676 |
| H | -0.600339 | -1.291677 | 1.258897  |
| H | 0.824461  | 1.031257  | 1.474319  |
| H | 0.603850  | 2.139572  | 0.044337  |
| H | 2.439914  | 0.515712  | -1.052129 |
| H | 1.599228  | -1.969951 | -0.164820 |
| C | -1.137004 | -0.008817 | -0.376589 |
| O | -2.298555 | 0.163973  | -0.057868 |
| H | -0.759291 | 0.327803  | -1.356584 |

TS-con-in-3-COMe-Acetone  
SCF Energy: -308.553426109  
ZPE-corrected Energy: -308.430554  
 $\Delta U$ : -308.423716  
 $\Delta H$ : -308.422771  
 $\Delta G$ : -308.461410

Num. Imaginary Frequencies: 1

Imaginary Frequency: -612.3167

|   |           |           |           |
|---|-----------|-----------|-----------|
| C | 0.159940  | -0.971477 | -0.330272 |
| C | 1.068132  | 0.183730  | 1.226329  |
| C | 1.811470  | 0.449305  | 0.044940  |
| C | 1.397778  | -0.499022 | -0.846045 |
| H | -0.099609 | -2.029388 | -0.361103 |
| H | 1.163355  | -0.785717 | 1.692592  |
| H | 0.712079  | 0.970213  | 1.888670  |
| H | 2.477991  | 1.289183  | -0.104257 |
| H | 1.894000  | -0.880215 | -1.728515 |
| C | -1.040332 | -0.147685 | -0.071452 |
| O | -2.033200 | -0.680470 | 0.403542  |
| C | -1.120862 | 1.303696  | -0.493498 |
| H | -1.464583 | 1.899150  | 0.350569  |
| H | -0.190661 | 1.707348  | -0.876340 |
| H | -1.883723 | 1.361899  | -1.269966 |



TS-con-in-3-COMe-Acetonitrile  
SCF Energy: -308.553732383  
ZPE-corrected Energy: -308.430857  
 $\Delta U$ : -308.424026  
 $\Delta H$ : -308.423082  
 $\Delta G$ : -308.461689

Num. Imaginary Frequencies: 1

Imaginary Frequency: -611.9232

|   |           |           |           |
|---|-----------|-----------|-----------|
| C | 0.159856  | -0.969212 | -0.336191 |
| C | 1.068279  | 0.176758  | 1.227840  |
| C | 1.811603  | 0.449182  | 0.047956  |
| C | 1.397641  | -0.493256 | -0.849029 |
| H | -0.099371 | -2.026998 | -0.373603 |
| H | 1.163044  | -0.795609 | 1.688102  |
| H | 0.712774  | 0.959441  | 1.894936  |
| H | 2.478662  | 1.289546  | -0.095862 |
| H | 1.893322  | -0.868216 | -1.734451 |
| C | -1.039707 | -0.147152 | -0.071422 |
| O | -2.031981 | -0.682416 | 0.403173  |
| C | -1.122321 | 1.305126  | -0.489330 |
| H | -1.482842 | 1.895413  | 0.351219  |
| H | -0.188940 | 1.715676  | -0.856703 |
| H | -1.872908 | 1.361394  | -1.277975 |

TS-con-in-3-COMe-Dichloromethane

SCF Energy: -308.552546576

ZPE-corrected Energy: -308.429647

$\Delta U$ : -308.422812

$\Delta H$ : -308.421868

$\Delta G$ : -308.460492

Num. Imaginary Frequencies: 1

Imaginary Frequency: -614.0424

|   |           |           |           |
|---|-----------|-----------|-----------|
| C | 0.160299  | -0.967954 | -0.335842 |
| C | 1.073591  | 0.174506  | 1.227352  |
| C | 1.812534  | 0.450078  | 0.046011  |
| C | 1.396626  | -0.491981 | -0.851102 |
| H | -0.100090 | -2.025442 | -0.374543 |
| H | 1.169092  | -0.799210 | 1.684458  |
| H | 0.719821  | 0.954945  | 1.898058  |
| H | 2.478054  | 1.291580  | -0.098881 |
| H | 1.891716  | -0.867898 | -1.736524 |
| C | -1.042279 | -0.147076 | -0.070574 |
| O | -2.032244 | -0.684219 | 0.402294  |
| C | -1.125126 | 1.306331  | -0.485914 |
| H | -1.484094 | 1.894798  | 0.356515  |
| H | -0.192429 | 1.717220  | -0.854890 |
| H | -1.877987 | 1.364340  | -1.272134 |

TS-con-in-3-COMe-DMSO  
SCF Energy: -308.553833206  
ZPE-corrected Energy: -308.430960  
 $\Delta U$ : -308.424129  
 $\Delta H$ : -308.423185  
 $\Delta G$ : -308.461792

Num. Imaginary Frequencies: 1

Imaginary Frequency: -611.7312

|   |           |           |           |
|---|-----------|-----------|-----------|
| C | 0.159789  | -0.969461 | -0.335870 |
| C | 1.067825  | 0.177412  | 1.227802  |
| C | 1.811535  | 0.449072  | 0.047937  |
| C | 1.397719  | -0.493737 | -0.848669 |
| H | -0.099359 | -2.027283 | -0.372760 |
| H | 1.162490  | -0.794656 | 1.688729  |
| H | 0.712181  | 0.960576  | 1.894253  |
| H | 2.478738  | 1.289273  | -0.096111 |
| H | 1.893407  | -0.868960 | -1.733969 |
| C | -1.039496 | -0.147175 | -0.071473 |
| O | -2.032036 | -0.682120 | 0.403315  |
| C | -1.121986 | 1.304922  | -0.489908 |
| H | -1.482416 | 1.895579  | 0.350427  |
| H | -0.188558 | 1.715264  | -0.857372 |
| H | -1.872512 | 1.360974  | -1.278636 |

TS-con-in-3-COMe-Gas  
SCF Energy: -308.545116018  
ZPE-corrected Energy: -308.422176  
 $\Delta U$ : -308.415273  
 $\Delta H$ : -308.414329  
 $\Delta G$ : -308.453243

Num. Imaginary Frequencies: 1

Imaginary Frequency: -625.0615

|   |           |           |           |
|---|-----------|-----------|-----------|
| C | 0.161985  | -0.969955 | -0.314428 |
| C | 1.097738  | 0.188633  | 1.219900  |
| C | 1.816416  | 0.453588  | 0.026569  |
| C | 1.392009  | -0.506529 | -0.850241 |
| H | -0.106317 | -2.026318 | -0.336170 |
| H | 1.198763  | -0.780740 | 1.684216  |
| H | 0.750939  | 0.973563  | 1.889370  |
| H | 2.474674  | 1.296930  | -0.141419 |
| H | 1.886810  | -0.907416 | -1.725162 |
| C | -1.056656 | -0.148186 | -0.066487 |
| O | -2.037305 | -0.686099 | 0.400196  |
| C | -1.132981 | 1.307510  | -0.484863 |
| H | -1.435871 | 1.903875  | 0.374101  |
| H | -0.212966 | 1.700240  | -0.903628 |
| H | -1.928657 | 1.378291  | -1.225578 |

TS-con-in-3-COMe-n-Hexane  
SCF Energy: -308.548213430  
ZPE-corrected Energy: -308.425278  
 $\Delta U$ : -308.418408  
 $\Delta H$ : -308.417464  
 $\Delta G$ : -308.456229

Num. Imaginary Frequencies: 1

Imaginary Frequency: -620.9313

|   |           |           |           |
|---|-----------|-----------|-----------|
| C | 0.162019  | -0.965454 | -0.332407 |
| C | 1.087815  | 0.171810  | 1.225050  |
| C | 1.815023  | 0.452996  | 0.039524  |
| C | 1.394402  | -0.491117 | -0.855144 |
| H | -0.102096 | -2.022204 | -0.371209 |
| H | 1.185957  | -0.804005 | 1.676639  |
| H | 0.737616  | 0.947959  | 1.902816  |
| H | 2.476374  | 1.297164  | -0.110515 |
| H | 1.889871  | -0.873373 | -1.737866 |
| C | -1.050541 | -0.147304 | -0.068447 |
| O | -2.032960 | -0.688939 | 0.400097  |
| C | -1.132686 | 1.309116  | -0.478641 |
| H | -1.480739 | 1.894236  | 0.370632  |
| H | -0.203027 | 1.718632  | -0.857498 |
| H | -1.896470 | 1.372816  | -1.253388 |

TS-con-in-3-COMe-Water  
SCF Energy: -308.553965833  
ZPE-corrected Energy: -308.431109  
 $\Delta U$ : -308.424270  
 $\Delta H$ : -308.423326  
 $\Delta G$ : -308.461967

Num. Imaginary Frequencies: 1

Imaginary Frequency: -611.4218

|   |           |           |           |
|---|-----------|-----------|-----------|
| C | 0.159432  | -0.972762 | -0.328212 |
| C | 1.066743  | 0.187426  | 1.226028  |
| C | 1.811277  | 0.448684  | 0.044216  |
| C | 1.397871  | -0.501800 | -0.844323 |
| H | -0.100027 | -2.030771 | -0.356087 |
| H | 1.161450  | -0.780440 | 1.695717  |
| H | 0.710713  | 0.976531  | 1.885214  |
| H | 2.478911  | 1.287343  | -0.106593 |
| H | 1.893733  | -0.884496 | -1.726311 |
| C | -1.039429 | -0.147794 | -0.071584 |
| O | -2.033608 | -0.679003 | 0.404448  |
| C | -1.119559 | 1.302684  | -0.496381 |
| H | -1.459463 | 1.900609  | 0.347492  |
| H | -0.189910 | 1.704261  | -0.882676 |
| H | -1.884551 | 1.360360  | -1.270808 |

TS-con-in-3-COOH-Acetone  
SCF Energy: -344.498403445  
ZPE-corrected Energy: -344.398146  
 $\Delta U$ : -344.391939  
 $\Delta H$ : -344.390995  
 $\Delta G$ : -344.428360

Num. Imaginary Frequencies: 1

Imaginary Frequency: -636.7155

|   |           |           |           |
|---|-----------|-----------|-----------|
| C | -0.117991 | 0.998140  | -0.061566 |
| C | -1.128485 | -0.475111 | 1.152011  |
| C | -1.801766 | -0.431595 | -0.093137 |
| C | -1.346696 | 0.703631  | -0.706151 |
| H | 0.189923  | 2.018417  | 0.155543  |
| H | -1.226298 | 0.361319  | 1.826776  |
| H | -0.819075 | -1.406829 | 1.620898  |
| H | -2.456852 | -1.202412 | -0.478069 |
| H | -1.811687 | 1.308393  | -1.473294 |
| C | 1.057733  | 0.106293  | -0.059469 |
| O | 2.093607  | 0.391457  | 0.503164  |
| O | 0.951422  | -1.015855 | -0.795513 |
| H | 1.786989  | -1.491851 | -0.703189 |

TS-con-in-3-COOH-Acetonitrile  
SCF Energy: -344.498699855  
ZPE-corrected Energy: -344.398455  
 $\Delta U$ : -344.392248  
 $\Delta H$ : -344.391304  
 $\Delta G$ : -344.428668

Num. Imaginary Frequencies: 1

Imaginary Frequency: -636.5008

|   |           |           |           |
|---|-----------|-----------|-----------|
| C | -0.118060 | 0.998197  | -0.061791 |
| C | -1.127882 | -0.475543 | 1.152116  |
| C | -1.801781 | -0.431781 | -0.092757 |
| C | -1.346976 | 0.703421  | -0.705972 |
| H | 0.189403  | 2.018574  | 0.155454  |
| H | -1.225409 | 0.360828  | 1.827017  |
| H | -0.818319 | -1.407355 | 1.620695  |
| H | -2.457440 | -1.202374 | -0.477174 |
| H | -1.812251 | 1.308126  | -1.472982 |
| C | 1.057439  | 0.106409  | -0.059620 |
| O | 2.093179  | 0.391124  | 0.504077  |
| O | 0.951925  | -1.014867 | -0.796751 |
| H | 1.786752  | -1.492058 | -0.703479 |

TS-con-in-3-COOH-Dichloromethane  
SCF Energy: -344.497548891  
ZPE-corrected Energy: -344.397254  
 $\Delta U$ : -344.391048  
 $\Delta H$ : -344.390104  
 $\Delta G$ : -344.427473

Num. Imaginary Frequencies: 1

Imaginary Frequency: -637.3163

|   |           |           |           |
|---|-----------|-----------|-----------|
| C | -0.117787 | 0.997982  | -0.060714 |
| C | -1.130223 | -0.474253 | 1.151566  |
| C | -1.801784 | -0.431028 | -0.094333 |
| C | -1.345925 | 0.704418  | -0.706465 |
| H | 0.191367  | 2.017931  | 0.156290  |
| H | -1.228802 | 0.362138  | 1.826204  |
| H | -0.821240 | -1.405869 | 1.620989  |
| H | -2.455420 | -1.202268 | -0.480842 |
| H | -1.810130 | 1.309593  | -1.473775 |
| C | 1.058592  | 0.105975  | -0.059013 |
| O | 2.094805  | 0.392284  | 0.500712  |
| O | 0.950103  | -1.018412 | -0.792274 |
| H | 1.787718  | -1.491061 | -0.702622 |

TS-con-in-3-COOH-DMSO  
SCF Energy: -344.498796674  
ZPE-corrected Energy: -344.398556  
 $\Delta U$ : -344.392349  
 $\Delta H$ : -344.391405  
 $\Delta G$ : -344.428769

Num. Imaginary Frequencies: 1

Imaginary Frequency: -636.4295

|   |           |           |           |
|---|-----------|-----------|-----------|
| C | -0.118082 | 0.998217  | -0.061853 |
| C | -1.127683 | -0.475696 | 1.152144  |
| C | -1.801785 | -0.431840 | -0.092637 |
| C | -1.347067 | 0.703361  | -0.705906 |
| H | 0.189234  | 2.018625  | 0.155447  |
| H | -1.225118 | 0.360648  | 1.827099  |
| H | -0.818067 | -1.407544 | 1.620610  |
| H | -2.457629 | -1.202356 | -0.476895 |
| H | -1.812437 | 1.308058  | -1.472864 |
| C | 1.057342  | 0.106447  | -0.059669 |
| O | 2.093042  | 0.391011  | 0.504371  |
| O | 0.952082  | -1.014542 | -0.797157 |
| H | 1.786668  | -1.492124 | -0.703586 |

TS-con-in-3-COOH-Gas  
SCF Energy: -344.489910347  
ZPE-corrected Energy: -344.389323  
 $\Delta U$ : -344.383120  
 $\Delta H$ : -344.382176  
 $\Delta G$ : -344.419597

Num. Imaginary Frequencies: 1

Imaginary Frequency: -641.6836

|   |           |           |           |
|---|-----------|-----------|-----------|
| C | -0.114187 | 0.997806  | -0.039511 |
| C | -1.147349 | -0.483031 | 1.139722  |
| C | -1.802811 | -0.421881 | -0.112285 |
| C | -1.337647 | 0.723428  | -0.699624 |
| H | 0.205923  | 2.011659  | 0.191495  |
| H | -1.252564 | 0.343218  | 1.825264  |
| H | -0.844043 | -1.421680 | 1.598911  |
| H | -2.446582 | -1.188884 | -0.522747 |
| H | -1.794610 | 1.344918  | -1.458356 |
| C | 1.066862  | 0.103379  | -0.053660 |
| O | 2.108751  | 0.394882  | 0.477297  |
| O | 0.935637  | -1.035376 | -0.769587 |
| H | 1.787559  | -1.483490 | -0.704098 |



TS-con-in-3-COOH-n-Hexane  
SCF Energy: -344.493174620  
ZPE-corrected Energy: -344.392704  
 $\Delta U$ : -344.386501  
 $\Delta H$ : -344.385557  
 $\Delta G$ : -344.422954

Num. Imaginary Frequencies: 1

Imaginary Frequency: -639.9514

|   |           |           |           |
|---|-----------|-----------|-----------|
| C | -0.116181 | 0.997919  | -0.051098 |
| C | -1.138943 | -0.476663 | 1.146317  |
| C | -1.801982 | -0.426823 | -0.102931 |
| C | -1.341734 | 0.713092  | -0.703971 |
| H | 0.199041  | 2.015083  | 0.171158  |
| H | -1.241354 | 0.355467  | 1.825343  |
| H | -0.832221 | -1.410893 | 1.612180  |
| H | -2.449475 | -1.197183 | -0.501185 |
| H | -1.802266 | 1.325240  | -1.468048 |
| C | 1.063064  | 0.104636  | -0.056310 |
| O | 2.101919  | 0.394256  | 0.488012  |
| O | 0.942154  | -1.028508 | -0.779104 |
| H | 1.788352  | -1.486674 | -0.702750 |

TS-con-in-3-COOH-Water  
SCF Energy: -344.498922783  
ZPE-corrected Energy: -344.398688  
 $\Delta U$ : -344.392481  
 $\Delta H$ : -344.391537  
 $\Delta G$ : -344.428900

Num. Imaginary Frequencies: 1

Imaginary Frequency: -636.3352

|   |           |           |           |
|---|-----------|-----------|-----------|
| C | -0.118110 | 0.998247  | -0.061920 |
| C | -1.127420 | -0.475907 | 1.152175  |
| C | -1.801787 | -0.431912 | -0.092486 |
| C | -1.347183 | 0.703295  | -0.705812 |
| H | 0.189016  | 2.018692  | 0.155463  |
| H | -1.224738 | 0.360393  | 1.827210  |
| H | -0.817737 | -1.407808 | 1.620482  |
| H | -2.457868 | -1.202329 | -0.476548 |
| H | -1.812678 | 1.307991  | -1.472692 |
| C | 1.057216  | 0.106498  | -0.059733 |
| O | 2.092870  | 0.390861  | 0.504744  |
| O | 0.952276  | -1.014118 | -0.797684 |
| H | 1.786547  | -1.492211 | -0.703737 |

TS-con-in-3-Me-Acetone  
SCF Energy: -195.199515336  
ZPE-corrected Energy: -195.086746  
 $\Delta U$ : -195.081761  
 $\Delta H$ : -195.080817  
 $\Delta G$ : -195.114268

Num. Imaginary Frequencies: 1

Imaginary Frequency: -705.6738

|   |           |           |           |
|---|-----------|-----------|-----------|
| C | -0.667273 | -0.435650 | 0.489777  |
| C | 0.903352  | 1.037401  | 0.335443  |
| C | 1.321023  | -0.079129 | -0.420629 |
| C | 0.482682  | -1.094123 | -0.019271 |
| H | -1.153870 | -0.858472 | 1.373726  |
| H | 0.884925  | 0.956451  | 1.411597  |
| H | 0.943818  | 2.058521  | -0.040959 |
| H | 2.087521  | -0.078335 | -1.187280 |
| H | 0.683245  | -2.157047 | 0.055747  |
| C | -1.653955 | 0.329717  | -0.364188 |
| H | -2.482447 | -0.335748 | -0.627042 |
| H | -2.084736 | 1.176875  | 0.169380  |
| H | -1.193428 | 0.688460  | -1.281960 |

TS-con-in-3-Me-Acetonitrile  
SCF Energy: -195.199565832  
ZPE-corrected Energy: -195.086808  
 $\Delta U$ : -195.081821  
 $\Delta H$ : -195.080877  
 $\Delta G$ : -195.114330

Num. Imaginary Frequencies: 1

Imaginary Frequency: -705.6778

|   |           |           |           |
|---|-----------|-----------|-----------|
| C | -0.667218 | -0.435773 | 0.489692  |
| C | 0.903136  | 1.037487  | 0.335484  |
| C | 1.321129  | -0.078969 | -0.420563 |
| C | 0.482853  | -1.094137 | -0.019324 |
| H | -1.153739 | -0.858522 | 1.373689  |
| H | 0.884311  | 0.956507  | 1.411649  |
| H | 0.943272  | 2.058605  | -0.040931 |
| H | 2.087677  | -0.077968 | -1.187185 |
| H | 0.683549  | -2.157039 | 0.055836  |
| C | -1.653955 | 0.329591  | -0.364215 |
| H | -2.482397 | -0.335956 | -0.627016 |
| H | -2.084814 | 1.176621  | 0.169477  |
| H | -1.193524 | 0.688556  | -1.281964 |

TS-con-in-3-Me-Dichloromethane  
SCF Energy: -195.199373127  
ZPE-corrected Energy: -195.086571  
 $\Delta U$ : -195.081589  
 $\Delta H$ : -195.080644  
 $\Delta G$ : -195.114091

Num. Imaginary Frequencies: 1

Imaginary Frequency: -705.7750

|   |           |           |           |
|---|-----------|-----------|-----------|
| C | -0.667240 | -0.435569 | 0.489981  |
| C | 0.903279  | 1.037273  | 0.335424  |
| C | 1.320749  | -0.079288 | -0.420689 |
| C | 0.482471  | -1.094096 | -0.019208 |
| H | -1.154308 | -0.858665 | 1.373619  |
| H | 0.885883  | 0.956448  | 1.411537  |
| H | 0.944437  | 2.058439  | -0.040893 |
| H | 2.087041  | -0.078447 | -1.187480 |
| H | 0.683063  | -2.156988 | 0.055380  |
| C | -1.653707 | 0.329877  | -0.364159 |
| H | -2.482006 | -0.335505 | -0.627844 |
| H | -2.084773 | 1.177012  | 0.169251  |
| H | -1.192649 | 0.688525  | -1.281664 |

TS-con-in-3-Me-DMSO  
SCF Energy: -195.199582468  
ZPE-corrected Energy: -195.086828  
 $\Delta U$ : -195.081841  
 $\Delta H$ : -195.080897  
 $\Delta G$ : -195.114351

Num. Imaginary Frequencies: 1

Imaginary Frequency: -705.6789

|   |           |           |           |
|---|-----------|-----------|-----------|
| C | -0.667200 | -0.435813 | 0.489664  |
| C | 0.903064  | 1.037516  | 0.335498  |
| C | 1.321163  | -0.078915 | -0.420542 |
| C | 0.482910  | -1.094142 | -0.019341 |
| H | -1.153695 | -0.858538 | 1.373678  |
| H | 0.884108  | 0.956525  | 1.411666  |
| H | 0.943091  | 2.058633  | -0.040921 |
| H | 2.087729  | -0.077846 | -1.187154 |
| H | 0.683650  | -2.157037 | 0.055866  |
| C | -1.653956 | 0.329549  | -0.364224 |
| H | -2.482380 | -0.336025 | -0.627007 |
| H | -2.084839 | 1.176537  | 0.169509  |
| H | -1.193555 | 0.688587  | -1.281965 |

TS-con-in-3-Me-Gas  
SCF Energy: -195.198297924  
ZPE-corrected Energy: -195.085250  
 $\Delta U$ : -195.080287  
 $\Delta H$ : -195.079343  
 $\Delta G$ : -195.112756

Num. Imaginary Frequencies: 1

Imaginary Frequency: -705.4206

|   |           |           |           |
|---|-----------|-----------|-----------|
| C | -0.668131 | -0.433573 | 0.491543  |
| C | 0.906947  | 1.035564  | 0.334902  |
| C | 1.318287  | -0.081836 | -0.422213 |
| C | 0.479534  | -1.093810 | -0.018112 |
| H | -1.156247 | -0.858061 | 1.374420  |
| H | 0.896849  | 0.954914  | 1.410753  |
| H | 0.953774  | 2.056925  | -0.040619 |
| H | 2.083645  | -0.084445 | -1.189474 |
| H | 0.678252  | -2.156994 | 0.052958  |
| C | -1.653358 | 0.332093  | -0.363678 |
| H | -2.483508 | -0.331055 | -0.627324 |
| H | -2.081959 | 1.182515  | 0.166655  |
| H | -1.190478 | 0.685573  | -1.282022 |

TS-con-in-3-Me-n-Hexane  
SCF Energy: -195.198719601  
ZPE-corrected Energy: -195.085772  
 $\Delta U$ : -195.080801  
 $\Delta H$ : -195.079857  
 $\Delta G$ : -195.113285

Num. Imaginary Frequencies: 1

Imaginary Frequency: -705.4798

|   |           |           |           |
|---|-----------|-----------|-----------|
| C | -0.667990 | -0.433888 | 0.491069  |
| C | 0.906462  | 1.036071  | 0.334978  |
| C | 1.319218  | -0.081326 | -0.421804 |
| C | 0.480239  | -1.093959 | -0.018496 |
| H | -1.155730 | -0.857516 | 1.374398  |
| H | 0.893795  | 0.955361  | 1.410932  |
| H | 0.951553  | 2.057286  | -0.041001 |
| H | 2.084923  | -0.083347 | -1.188908 |
| H | 0.679130  | -2.157103 | 0.054607  |
| C | -1.653811 | 0.331509  | -0.363816 |
| H | -2.483125 | -0.332685 | -0.627406 |
| H | -2.083466 | 1.180631  | 0.167718  |
| H | -1.191786 | 0.686938  | -1.281921 |

TS-con-in-3-Me-Water  
SCF Energy: -195.199604243  
ZPE-corrected Energy: -195.086855  
 $\Delta U$ : -195.081868  
 $\Delta H$ : -195.080923  
 $\Delta G$ : -195.114377

Num. Imaginary Frequencies: 1

Imaginary Frequency: -705.6802

|   |           |           |           |
|---|-----------|-----------|-----------|
| C | -0.667175 | -0.435867 | 0.489627  |
| C | 0.902970  | 1.037553  | 0.335517  |
| C | 1.321208  | -0.078845 | -0.420514 |
| C | 0.482985  | -1.094149 | -0.019364 |
| H | -1.153638 | -0.858560 | 1.373662  |
| H | 0.883841  | 0.956548  | 1.411690  |
| H | 0.942852  | 2.058669  | -0.040906 |
| H | 2.087795  | -0.077684 | -1.187114 |
| H | 0.683783  | -2.157034 | 0.055906  |
| C | -1.653955 | 0.329494  | -0.364236 |
| H | -2.482359 | -0.336115 | -0.626995 |
| H | -2.084872 | 1.176427  | 0.169551  |
| H | -1.193596 | 0.688629  | -1.281967 |

TS-con-in-3-NH2-Acetone  
SCF Energy: -211.239677565  
ZPE-corrected Energy: -211.137884  
 $\Delta U$ : -211.132877  
 $\Delta H$ : -211.131933  
 $\Delta G$ : -211.165482

Num. Imaginary Frequencies: 1

Imaginary Frequency: -730.5841

|   |           |           |           |
|---|-----------|-----------|-----------|
| C | -0.696066 | -0.399578 | 0.461910  |
| C | 0.894747  | 1.036085  | 0.307620  |
| C | 1.310091  | -0.106451 | -0.408048 |
| C | 0.452511  | -1.097498 | 0.008375  |
| H | -1.234320 | -0.792510 | 1.330194  |
| H | 0.867257  | 0.987989  | 1.385409  |
| H | 0.948489  | 2.043335  | -0.101782 |
| H | 2.082630  | -0.132934 | -1.168230 |
| H | 0.625956  | -2.161576 | 0.118728  |
| N | -1.544352 | 0.348922  | -0.451358 |
| H | -2.390811 | -0.194566 | -0.599351 |
| H | -1.856442 | 1.212454  | -0.024604 |

TS-con-in-3-NH2-Acetonitrile  
SCF Energy: -211.239898954  
ZPE-corrected Energy: -211.138108  
 $\Delta U$ : -211.133101  
 $\Delta H$ : -211.132157  
 $\Delta G$ : -211.165705

Num. Imaginary Frequencies: 1

Imaginary Frequency: -730.7574

|   |           |           |           |
|---|-----------|-----------|-----------|
| C | -0.695946 | -0.399855 | 0.461447  |
| C | 0.894307  | 1.036306  | 0.307619  |
| C | 1.310610  | -0.106108 | -0.407792 |
| C | 0.453016  | -1.097439 | 0.008152  |
| H | -1.234042 | -0.792731 | 1.329757  |
| H | 0.865700  | 0.988201  | 1.385393  |
| H | 0.947888  | 2.043657  | -0.101575 |
| H | 2.084011  | -0.132445 | -1.167138 |
| H | 0.626860  | -2.161399 | 0.119144  |
| N | -1.544938 | 0.348378  | -0.451524 |
| H | -2.392583 | -0.194206 | -0.596189 |
| H | -1.855194 | 1.212852  | -0.025278 |

TS-con-in-3-NH2-Dichloromethane  
SCF Energy: -211.239061679  
ZPE-corrected Energy: -211.137261  
 $\Delta U$ : -211.132253  
 $\Delta H$ : -211.131309  
 $\Delta G$ : -211.164862

Num. Imaginary Frequencies: 1

Imaginary Frequency: -730.1003

|   |           |           |           |
|---|-----------|-----------|-----------|
| C | -0.696379 | -0.398939 | 0.463127  |
| C | 0.895820  | 1.035486  | 0.307757  |
| C | 1.308624  | -0.107235 | -0.408883 |
| C | 0.451343  | -1.097630 | 0.008958  |
| H | -1.235064 | -0.792181 | 1.331266  |
| H | 0.871712  | 0.987231  | 1.385578  |
| H | 0.949764  | 2.042550  | -0.102035 |
| H | 2.078799  | -0.133986 | -1.171350 |
| H | 0.623907  | -2.161998 | 0.117570  |
| N | -1.542856 | 0.350246  | -0.450910 |
| H | -2.386494 | -0.195177 | -0.607123 |
| H | -1.859079 | 1.211751  | -0.023289 |

TS-con-in-3-NH2-DMSO  
SCF Energy: -211.239972179  
ZPE-corrected Energy: -211.138182  
 $\Delta U$ : -211.133176  
 $\Delta H$ : -211.132231  
 $\Delta G$ : -211.165779

Num. Imaginary Frequencies: 1

Imaginary Frequency: -730.8157

|   |           |           |           |
|---|-----------|-----------|-----------|
| C | -0.695904 | -0.399953 | 0.461290  |
| C | 0.894152  | 1.036382  | 0.307620  |
| C | 1.310784  | -0.105988 | -0.407705 |
| C | 0.453191  | -1.097418 | 0.008076  |
| H | -1.233945 | -0.792814 | 1.329608  |
| H | 0.865166  | 0.988271  | 1.385389  |
| H | 0.947672  | 2.043767  | -0.101502 |
| H | 2.084475  | -0.132270 | -1.166770 |
| H | 0.627174  | -2.161338 | 0.119278  |
| N | -1.545133 | 0.348192  | -0.451578 |
| H | -2.393174 | -0.194085 | -0.595134 |
| H | -1.854770 | 1.212985  | -0.025508 |

TS-con-in-3-NH2-Gas  
SCF Energy: -211.234671907  
ZPE-corrected Energy: -211.132820  
 $\Delta U$ : -211.127797  
 $\Delta H$ : -211.126853  
 $\Delta G$ : -211.160445

Num. Imaginary Frequencies: 1

Imaginary Frequency: -726.8113

|   |           |           |           |
|---|-----------|-----------|-----------|
| C | -0.698818 | -0.393357 | 0.471912  |
| C | 0.904213  | 1.031249  | 0.307416  |
| C | 1.299542  | -0.113338 | -0.413966 |
| C | 0.441868  | -1.098295 | 0.012731  |
| H | -1.238297 | -0.785036 | 1.341827  |
| H | 0.896478  | 0.982695  | 1.385133  |
| H | 0.961553  | 2.036936  | -0.105150 |
| H | 2.056506  | -0.143726 | -1.188766 |
| H | 0.608096  | -2.164172 | 0.113549  |
| N | -1.532937 | 0.359410  | -0.447057 |
| H | -2.348615 | -0.202659 | -0.672292 |
| H | -1.885989 | 1.202540  | -0.013462 |

TS-con-in-3-NH2-n-Hexane  
SCF Energy: -211.236341758  
ZPE-corrected Energy: -211.134527  
 $\Delta U$ : -211.129504  
 $\Delta H$ : -211.128560  
 $\Delta G$ : -211.162153

Num. Imaginary Frequencies: 1

Imaginary Frequency: -728.0531

|   |           |           |           |
|---|-----------|-----------|-----------|
| C | -0.697840 | -0.395385 | 0.468699  |
| C | 0.901086  | 1.032849  | 0.307593  |
| C | 1.302819  | -0.111169 | -0.412058 |
| C | 0.445309  | -1.098141 | 0.011431  |
| H | -1.237392 | -0.788045 | 1.337621  |
| H | 0.887946  | 0.984557  | 1.385393  |
| H | 0.957190  | 2.038906  | -0.104272 |
| H | 2.063932  | -0.140127 | -1.183078 |
| H | 0.613772  | -2.163527 | 0.114762  |
| N | -1.536370 | 0.356237  | -0.448602 |
| H | -2.363012 | -0.200231 | -0.647890 |
| H | -1.876087 | 1.205889  | -0.016309 |

TS-con-in-3-NH2-Water

SCF Energy: -211.240068250

ZPE-corrected Energy: -211.138279

$\Delta U$ : -211.133273

$\Delta H$ : -211.132329

$\Delta G$ : -211.165875

Num. Imaginary Frequencies: 1

Imaginary Frequency: -730.8882

|   |           |           |           |
|---|-----------|-----------|-----------|
| C | -0.695841 | -0.400121 | 0.461073  |
| C | 0.893886  | 1.036497  | 0.307641  |
| C | 1.311010  | -0.105792 | -0.407592 |
| C | 0.453466  | -1.097391 | 0.007979  |
| H | -1.233795 | -0.792961 | 1.329412  |
| H | 0.864378  | 0.988366  | 1.385399  |
| H | 0.947286  | 2.043938  | -0.101371 |
| H | 2.085037  | -0.131935 | -1.166334 |
| H | 0.627689  | -2.161248 | 0.119435  |
| N | -1.545371 | 0.347926  | -0.451654 |
| H | -2.393932 | -0.193940 | -0.593760 |
| H | -1.854194 | 1.213133  | -0.025807 |



TS-con-in-3-NO2-Acetone  
SCF Energy: -360.417155129  
ZPE-corrected Energy: -360.328975  
 $\Delta U$ : -360.323109  
 $\Delta H$ : -360.322165  
 $\Delta G$ : -360.359010

Num. Imaginary Frequencies: 1

Imaginary Frequency: -642.7447

|   |           |           |           |
|---|-----------|-----------|-----------|
| C | -0.043416 | 0.914534  | 0.277647  |
| C | -1.178696 | -0.808845 | 0.930019  |
| C | -1.778502 | -0.310754 | -0.246572 |
| C | -1.260082 | 0.946712  | -0.427226 |
| H | 0.420940  | 1.751806  | 0.782476  |
| H | -1.250736 | -0.231625 | 1.838340  |
| H | -0.941268 | -1.861267 | 1.064818  |
| H | -2.433318 | -0.876488 | -0.896498 |
| H | -1.661363 | 1.802158  | -0.952246 |
| N | 1.048249  | 0.003081  | -0.117429 |
| O | 0.935818  | -0.758181 | -1.054299 |
| O | 2.075704  | 0.126177  | 0.527037  |

TS-con-in-3-NO2-Acetonitrile  
SCF Energy: -360.417489205  
ZPE-corrected Energy: -360.329320  
 $\Delta U$ : -360.323454  
 $\Delta H$ : -360.322510  
 $\Delta G$ : -360.359352

Num. Imaginary Frequencies: 1

Imaginary Frequency: -642.4159

|   |           |           |           |
|---|-----------|-----------|-----------|
| C | -0.043318 | 0.913687  | 0.280141  |
| C | -1.178340 | -0.812102 | 0.927607  |
| C | -1.778838 | -0.310194 | -0.247149 |
| C | -1.260254 | 0.947569  | -0.424563 |
| H | 0.420307  | 1.749506  | 0.787977  |
| H | -1.249645 | -0.237586 | 1.837711  |
| H | -0.941118 | -1.864989 | 1.059081  |
| H | -2.434832 | -0.873635 | -0.897883 |
| H | -1.661614 | 1.804574  | -0.946952 |
| N | 1.047943  | 0.003938  | -0.117345 |
| O | 0.936748  | -0.753502 | -1.057774 |
| O | 2.075227  | 0.123603  | 0.528433  |

TS-con-in-3-NO2-Dichloromethane

SCF Energy: -360.416195448

ZPE-corrected Energy: -360.327987

$\Delta U$ : -360.322122

$\Delta H$ : -360.321178

$\Delta G$ : -360.358027

Num. Imaginary Frequencies: 1

Imaginary Frequency: -643.5913

|   |           |           |           |
|---|-----------|-----------|-----------|
| C | -0.043481 | 0.917122  | 0.269777  |
| C | -1.180075 | -0.798434 | 0.937605  |
| C | -1.777490 | -0.312276 | -0.244890 |
| C | -1.259362 | 0.944093  | -0.435810 |
| H | 0.422929  | 1.758907  | 0.765316  |
| H | -1.254307 | -0.212564 | 1.840136  |
| H | -0.942158 | -1.849361 | 1.082909  |
| H | -2.428757 | -0.885127 | -0.892130 |
| H | -1.660305 | 1.794913  | -0.968602 |
| N | 1.049134  | 0.000302  | -0.117552 |
| O | 0.932628  | -0.773509 | -1.042663 |
| O | 2.077510  | 0.134520  | 0.522056  |

TS-con-in-3-NO2-DMSO

SCF Energy: -360.417598479

ZPE-corrected Energy: -360.329432

$\Delta U$ : -360.323567

$\Delta H$ : -360.322623

$\Delta G$ : -360.359464

Num. Imaginary Frequencies: 1

Imaginary Frequency: -642.3062

|   |           |           |           |
|---|-----------|-----------|-----------|
| C | -0.043294 | 0.913386  | 0.281056  |
| C | -1.178188 | -0.813310 | 0.926699  |
| C | -1.778961 | -0.309992 | -0.247346 |
| C | -1.260326 | 0.947883  | -0.423555 |
| H | 0.420088  | 1.748667  | 0.789975  |
| H | -1.249204 | -0.239811 | 1.837472  |
| H | -0.941034 | -1.866367 | 1.056924  |
| H | -2.435398 | -0.872577 | -0.898376 |
| H | -1.661710 | 1.805442  | -0.945009 |
| N | 1.047842  | 0.004251  | -0.117324 |
| O | 0.937081  | -0.751765 | -1.059057 |
| O | 2.075042  | 0.122651  | 0.528951  |

TS-con-in-3-NO2-Gas  
SCF Energy: -360.407847257  
ZPE-corrected Energy: -360.319426  
 $\Delta U$ : -360.313564  
 $\Delta H$ : -360.312620  
 $\Delta G$ : -360.349519

Num. Imaginary Frequencies: 1

Imaginary Frequency: -647.7627

|   |           |           |           |
|---|-----------|-----------|-----------|
| C | -0.040349 | 0.931262  | 0.222674  |
| C | -1.199651 | -0.724672 | 0.979257  |
| C | -1.770618 | -0.313079 | -0.241250 |
| C | -1.247491 | 0.933303  | -0.491523 |
| H | 0.444817  | 1.796065  | 0.658480  |
| H | -1.293544 | -0.085232 | 1.842283  |
| H | -0.965129 | -1.764931 | 1.191765  |
| H | -2.394996 | -0.928536 | -0.875711 |
| H | -1.640281 | 1.755679  | -1.073244 |
| N | 1.057414  | -0.024678 | -0.114395 |
| O | 0.900861  | -0.893949 | -0.936747 |
| O | 2.098625  | 0.198801  | 0.467027  |

TS-con-in-3-NO2-n-Hexane  
SCF Energy: -360.411367425  
ZPE-corrected Energy: -360.323021  
 $\Delta U$ : -360.317159  
 $\Delta H$ : -360.316215  
 $\Delta G$ : -360.353096

Num. Imaginary Frequencies: 1

Imaginary Frequency: -646.8095

|   |           |           |           |
|---|-----------|-----------|-----------|
| C | -0.042296 | 0.926911  | 0.237557  |
| C | -1.190407 | -0.751206 | 0.967189  |
| C | -1.773280 | -0.315280 | -0.240319 |
| C | -1.253270 | 0.934850  | -0.472843 |
| H | 0.435022  | 1.785634  | 0.692940  |
| H | -1.276765 | -0.129137 | 1.843811  |
| H | -0.953796 | -1.795206 | 1.157862  |
| H | -2.408543 | -0.916768 | -0.877376 |
| H | -1.650485 | 1.766230  | -1.038380 |
| N | 1.053995  | -0.014123 | -0.116557 |
| O | 0.915222  | -0.846502 | -0.981847 |
| O | 2.088793  | 0.173560  | 0.492789  |

TS-con-in-3-NO2-Water  
SCF Energy: -360.417740915  
ZPE-corrected Energy: -360.329579  
 $\Delta U$ : -360.323713  
 $\Delta H$ : -360.322769  
 $\Delta G$ : -360.359610

Num. Imaginary Frequencies: 1

Imaginary Frequency: -642.1709

|   |           |           |           |
|---|-----------|-----------|-----------|
| C | -0.043266 | 0.912976  | 0.282263  |
| C | -1.178025 | -0.814859 | 0.925525  |
| C | -1.779115 | -0.309726 | -0.247621 |
| C | -1.260403 | 0.948288  | -0.422265 |
| H | 0.419792  | 1.747545  | 0.792614  |
| H | -1.248705 | -0.242670 | 1.837155  |
| H | -0.940971 | -1.868133 | 1.054155  |
| H | -2.436092 | -0.871212 | -0.899059 |
| H | -1.661812 | 1.806566  | -0.942508 |
| N | 1.047714  | 0.004652  | -0.117287 |
| O | 0.937523  | -0.749499 | -1.060724 |
| O | 2.074806  | 0.121407  | 0.529629  |

TS-con-in-3-OMe-Acetone  
SCF Energy: -270.406619956  
ZPE-corrected Energy: -270.289306  
 $\Delta U$ : -270.283106  
 $\Delta H$ : -270.282161  
 $\Delta G$ : -270.319148

Num. Imaginary Frequencies: 1

Imaginary Frequency: -734.5740

|   |           |           |           |
|---|-----------|-----------|-----------|
| C | -0.147190 | -0.235675 | 0.660744  |
| C | 1.556214  | 0.955075  | 0.166305  |
| C | 1.675741  | -0.252472 | -0.553063 |
| C | 0.795012  | -1.112331 | 0.065364  |
| H | -0.631392 | -0.498987 | 1.606712  |
| H | 1.730084  | 0.937921  | 1.230902  |
| H | 1.658661  | 1.933085  | -0.298856 |
| H | 2.280176  | -0.405644 | -1.440080 |
| H | 0.852570  | -2.183662 | 0.214864  |
| O | -0.987106 | 0.590022  | -0.087931 |
| C | -2.253297 | -0.020758 | -0.276281 |
| H | -2.878788 | 0.695966  | -0.802793 |
| H | -2.158344 | -0.933943 | -0.869880 |
| H | -2.714999 | -0.267940 | 0.684165  |

TS-con-in-3-OMe-Acetonitrile  
SCF Energy: -270.406767284  
ZPE-corrected Energy: -270.289463  
 $\Delta U$ : -270.283260  
 $\Delta H$ : -270.282316  
 $\Delta G$ : -270.319309

Num. Imaginary Frequencies: 1

Imaginary Frequency: -734.6362

|   |           |           |           |
|---|-----------|-----------|-----------|
| C | -0.147307 | -0.235533 | 0.660319  |
| C | 1.556656  | 0.955049  | 0.166551  |
| C | 1.676242  | -0.252617 | -0.552778 |
| C | 0.795036  | -1.112282 | 0.065264  |
| H | -0.631740 | -0.498633 | 1.606159  |
| H | 1.729852  | 0.937851  | 1.231272  |
| H | 1.660156  | 1.933020  | -0.298536 |
| H | 2.281475  | -0.406037 | -1.439222 |
| H | 0.852427  | -2.183559 | 0.215178  |
| O | -0.987207 | 0.589870  | -0.088871 |
| C | -2.254000 | -0.020657 | -0.275726 |
| H | -2.879434 | 0.695628  | -0.802891 |
| H | -2.159709 | -0.934686 | -0.868086 |
| H | -2.715138 | -0.266301 | 0.685313  |

TS-con-in-3-OMe-Dichloromethane  
SCF Energy: -270.406207463

ZPE-corrected Energy: -270.288866  
 $\Delta U$ : -270.282672  
 $\Delta H$ : -270.281727  
 $\Delta G$ : -270.318696

Num. Imaginary Frequencies: 1

Imaginary Frequency: -734.3080

|   |           |           |           |
|---|-----------|-----------|-----------|
| C | -0.146770 | -0.235509 | 0.662500  |
| C | 1.555368  | 0.954880  | 0.165082  |
| C | 1.673655  | -0.252698 | -0.554258 |
| C | 0.794233  | -1.112428 | 0.065999  |
| H | -0.629930 | -0.498740 | 1.609216  |
| H | 1.731363  | 0.937958  | 1.229288  |
| H | 1.655408  | 1.932851  | -0.300505 |
| H | 2.275429  | -0.405610 | -1.443086 |
| H | 0.851884  | -2.183793 | 0.215338  |
| O | -0.986801 | 0.590967  | -0.084636 |
| C | -2.250777 | -0.021224 | -0.278355 |
| H | -2.876360 | 0.696492  | -0.803446 |
| H | -2.152912 | -0.931863 | -0.875501 |
| H | -2.714723 | -0.273155 | 0.679987  |

TS-con-in-3-OMe-DMSO  
SCF Energy: -270.406815900  
ZPE-corrected Energy: -270.289514  
 $\Delta U$ : -270.283312  
 $\Delta H$ : -270.282367  
 $\Delta G$ : -270.319362

Num. Imaginary Frequencies: 1

Imaginary Frequency: -734.6577

|   |           |           |           |
|---|-----------|-----------|-----------|
| C | -0.147350 | -0.235498 | 0.660154  |
| C | 1.556792  | 0.955046  | 0.166652  |
| C | 1.676438  | -0.252644 | -0.552665 |
| C | 0.795068  | -1.112268 | 0.065216  |
| H | -0.631875 | -0.498547 | 1.605939  |
| H | 1.729748  | 0.937830  | 1.231417  |
| H | 1.660626  | 1.933010  | -0.298401 |
| H | 2.281945  | -0.406130 | -1.438914 |
| H | 0.852413  | -2.183528 | 0.215253  |
| O | -0.987244 | 0.589803  | -0.089216 |
| C | -2.254254 | -0.020620 | -0.275519 |
| H | -2.879687 | 0.695529  | -0.802865 |
| H | -2.160221 | -0.934929 | -0.867475 |
| H | -2.715162 | -0.265754 | 0.685736  |

TS-con-in-3-OMe-Gas  
SCF Energy: -270.403122572  
ZPE-corrected Energy: -270.285588  
 $\Delta U$ : -270.279431  
 $\Delta H$ : -270.278487  
 $\Delta G$ : -270.315332

Num. Imaginary Frequencies: 1

Imaginary Frequency: -732.2113

|   |           |           |           |
|---|-----------|-----------|-----------|
| C | -0.144486 | -0.237138 | 0.672059  |
| C | 1.547727  | 0.954581  | 0.159710  |
| C | 1.661505  | -0.251149 | -0.561212 |
| C | 0.791539  | -1.113285 | 0.068336  |
| H | -0.622899 | -0.503435 | 1.621568  |
| H | 1.738008  | 0.937639  | 1.221114  |
| H | 1.629739  | 1.933288  | -0.306818 |
| H | 2.247220  | -0.399806 | -1.461144 |
| H | 0.852400  | -2.185045 | 0.213387  |
| O | -0.984453 | 0.594544  | -0.065343 |
| C | -2.235233 | -0.022888 | -0.290060 |
| H | -2.861558 | 0.702660  | -0.803784 |
| H | -2.122273 | -0.917291 | -0.909825 |
| H | -2.711318 | -0.305095 | 0.655248  |

TS-con-in-3-OMe-n-Hexane  
SCF Energy: -270.404329313  
ZPE-corrected Energy: -270.286868  
 $\Delta U$ : -270.280699  
 $\Delta H$ : -270.279755  
 $\Delta G$ : -270.316640

Num. Imaginary Frequencies: 1

Imaginary Frequency: -733.1152

|   |           |           |           |
|---|-----------|-----------|-----------|
| C | -0.145330 | -0.235951 | 0.668972  |
| C | 1.550570  | 0.954649  | 0.161130  |
| C | 1.665865  | -0.252167 | -0.558673 |
| C | 0.792234  | -1.113068 | 0.067876  |
| H | -0.625361 | -0.500801 | 1.617619  |
| H | 1.736201  | 0.938302  | 1.223495  |
| H | 1.638734  | 1.932862  | -0.305665 |
| H | 2.257309  | -0.402851 | -1.454614 |
| H | 0.851920  | -2.184692 | 0.214589  |
| O | -0.985414 | 0.593797  | -0.071960 |
| C | -2.240635 | -0.022730 | -0.286191 |
| H | -2.867378 | 0.700040  | -0.803124 |
| H | -2.132336 | -0.922163 | -0.898994 |
| H | -2.712002 | -0.295480 | 0.663698  |

TS-con-in-3-OMe-Water  
SCF Energy: -270.406879597  
ZPE-corrected Energy: -270.289582  
 $\Delta U$ : -270.283379  
 $\Delta H$ : -270.282434  
 $\Delta G$ : -270.319432

Num. Imaginary Frequencies: 1

Imaginary Frequency: -734.6839

|   |           |           |           |
|---|-----------|-----------|-----------|
| C | -0.147406 | -0.235444 | 0.659942  |
| C | 1.556976  | 0.955039  | 0.166779  |
| C | 1.676696  | -0.252683 | -0.552513 |
| C | 0.795108  | -1.112251 | 0.065156  |
| H | -0.632047 | -0.498424 | 1.605657  |
| H | 1.729616  | 0.937809  | 1.231601  |
| H | 1.661232  | 1.932990  | -0.298241 |
| H | 2.282551  | -0.406258 | -1.438516 |
| H | 0.852386  | -2.183489 | 0.215355  |
| O | -0.987298 | 0.589722  | -0.089663 |
| C | -2.254585 | -0.020576 | -0.275250 |
| H | -2.880040 | 0.695409  | -0.802787 |
| H | -2.160884 | -0.935221 | -0.866723 |
| H | -2.715168 | -0.265100 | 0.686283  |

TS-con-out-3-CF3-Acetone  
SCF Energy: -492.993272597  
ZPE-corrected Energy: -492.903181  
 $\Delta U$ : -492.896167  
 $\Delta H$ : -492.895223  
 $\Delta G$ : -492.936052

Num. Imaginary Frequencies: 1

Imaginary Frequency: -652.0912

|   |           |           |           |
|---|-----------|-----------|-----------|
| C | 0.389825  | 0.018580  | -0.466458 |
| C | 2.167284  | -0.994176 | 0.085544  |
| C | 2.494746  | 0.378709  | -0.007461 |
| C | 1.282385  | 1.023322  | -0.023740 |
| H | 0.532785  | -0.445004 | -1.431230 |
| H | 2.750080  | -1.773735 | -0.400880 |
| H | 1.577584  | -1.332165 | 0.923736  |
| H | 3.488208  | 0.784248  | -0.146419 |
| H | 1.022360  | 2.031079  | 0.272985  |
| C | -1.039234 | -0.037486 | -0.019553 |
| F | -1.475133 | -1.302372 | 0.083041  |
| F | -1.225696 | 0.544050  | 1.172229  |
| F | -1.870399 | 0.580754  | -0.880624 |

TS-con-out-3-CF3-Acetonitrile  
SCF Energy: -492.993385981  
ZPE-corrected Energy: -492.903312  
 $\Delta U$ : -492.896295  
 $\Delta H$ : -492.895351  
 $\Delta G$ : -492.936207

Num. Imaginary Frequencies: 1

Imaginary Frequency: -652.1189

|   |           |           |           |
|---|-----------|-----------|-----------|
| C | 0.389890  | 0.018371  | -0.466462 |
| C | 2.167659  | -0.994111 | 0.085645  |
| C | 2.494759  | 0.378861  | -0.007399 |
| C | 1.282283  | 1.023293  | -0.023742 |
| H | 0.532959  | -0.445475 | -1.431099 |
| H | 2.750547  | -1.773488 | -0.400907 |
| H | 1.577887  | -1.332216 | 0.923752  |
| H | 3.488134  | 0.784532  | -0.146583 |
| H | 1.022210  | 2.031177  | 0.272575  |
| C | -1.039074 | -0.037582 | -0.019619 |
| F | -1.477148 | -1.302205 | 0.077191  |
| F | -1.224758 | 0.538703  | 1.174957  |
| F | -1.869743 | 0.586000  | -0.877512 |



TS-con-out-3-CF3-Dichloromethane  
SCF Energy: -492.992945019  
ZPE-corrected Energy: -492.902808  
 $\Delta U$ : -492.895798  
 $\Delta H$ : -492.894854  
 $\Delta G$ : -492.935668

Num. Imaginary Frequencies: 1

Imaginary Frequency: -652.0009

|   |           |           |           |
|---|-----------|-----------|-----------|
| C | 0.389583  | 0.019199  | -0.466655 |
| C | 2.166267  | -0.994307 | 0.085365  |
| C | 2.494628  | 0.378334  | -0.007614 |
| C | 1.282566  | 1.023429  | -0.023885 |
| H | 0.532468  | -0.443852 | -1.431677 |
| H | 2.748971  | -1.774393 | -0.400471 |
| H | 1.576526  | -1.331918 | 0.923653  |
| H | 3.488326  | 0.783543  | -0.145875 |
| H | 1.022632  | 2.030816  | 0.273996  |
| C | -1.039674 | -0.037254 | -0.019371 |
| F | -1.470982 | -1.302652 | 0.094048  |
| F | -1.227270 | 0.554080  | 1.167090  |
| F | -1.871653 | 0.570728  | -0.886322 |

TS-con-out-3-CF3-DMSO  
SCF Energy: -492.993422964  
ZPE-corrected Energy: -492.903356  
 $\Delta U$ : -492.896337  
 $\Delta H$ : -492.895393  
 $\Delta G$ : -492.936270

Num. Imaginary Frequencies: 1

Imaginary Frequency: -652.1943

|   |           |           |           |
|---|-----------|-----------|-----------|
| C | 0.389937  | 0.018064  | -0.466337 |
| C | 2.167858  | -0.994136 | 0.085564  |
| C | 2.494747  | 0.378926  | -0.007275 |
| C | 1.282180  | 1.023159  | -0.023613 |
| H | 0.532956  | -0.445705 | -1.431024 |
| H | 2.750821  | -1.773293 | -0.401235 |
| H | 1.578287  | -1.332473 | 0.923705  |
| H | 3.488052  | 0.784766  | -0.146468 |
| H | 1.021965  | 2.031066  | 0.272548  |
| C | -1.039008 | -0.037720 | -0.019634 |
| F | -1.478354 | -1.302055 | 0.075198  |
| F | -1.224425 | 0.536863  | 1.175869  |
| F | -1.869040 | 0.588068  | -0.876596 |

TS-con-out-3-CF3-Gas  
SCF Energy: -492.989995429  
ZPE-corrected Energy: -492.899514  
 $\Delta U$ : -492.892533  
 $\Delta H$ : -492.891589  
 $\Delta G$ : -492.932547

Num. Imaginary Frequencies: 1

Imaginary Frequency: -660.1795

|   |           |           |           |
|---|-----------|-----------|-----------|
| C | 0.384545  | 0.028560  | -0.498889 |
| C | 2.145785  | -0.999777 | 0.077638  |
| C | 2.484086  | 0.370977  | 0.006309  |
| C | 1.276385  | 1.022610  | -0.030997 |
| H | 0.543564  | -0.429902 | -1.462271 |
| H | 2.739685  | -1.778906 | -0.397095 |
| H | 1.529616  | -1.342013 | 0.894659  |
| H | 3.482356  | 0.773149  | -0.106091 |
| H | 1.010866  | 2.028405  | 0.264936  |
| C | -1.040730 | -0.037575 | -0.028602 |
| F | -1.841819 | -0.624822 | -0.923635 |
| F | -1.157294 | -0.733058 | 1.114642  |
| F | -1.534944 | 1.184602  | 0.214893  |

TS-con-out-3-CF3-n-Hexane  
SCF Energy: -492.991192235  
ZPE-corrected Energy: -492.900904  
 $\Delta U$ : -492.893883  
 $\Delta H$ : -492.892939  
 $\Delta G$ : -492.934383

Num. Imaginary Frequencies: 1

Imaginary Frequency: -658.7451

|   |           |           |           |
|---|-----------|-----------|-----------|
| C | 0.384727  | 0.022164  | -0.496746 |
| C | 2.157085  | -0.997093 | 0.080167  |
| C | 2.483830  | 0.376047  | 0.005580  |
| C | 1.272033  | 1.020599  | -0.030395 |
| H | 0.544569  | -0.439078 | -1.458635 |
| H | 2.755794  | -1.772446 | -0.394127 |
| H | 1.542925  | -1.341770 | 0.897784  |
| H | 3.479130  | 0.784637  | -0.110019 |
| H | 1.003319  | 2.026302  | 0.264348  |
| C | -1.039640 | -0.040695 | -0.028891 |
| F | -1.796573 | -0.814217 | -0.814898 |
| F | -1.139373 | -0.534053 | 1.216850  |
| F | -1.605603 | 1.176738  | 0.000532  |

TS-con-out-3-CF3-Water  
SCF Energy: -492.993471194  
ZPE-corrected Energy: -492.903410  
 $\Delta U$ : -492.896392  
 $\Delta H$ : -492.895448  
 $\Delta G$ : -492.936316

Num. Imaginary Frequencies: 1

Imaginary Frequency: -652.1271

|   |           |           |           |
|---|-----------|-----------|-----------|
| C | 0.389940  | 0.018177  | -0.466409 |
| C | 2.168013  | -0.994051 | 0.085699  |
| C | 2.494779  | 0.379003  | -0.007362 |
| C | 1.282191  | 1.023252  | -0.023708 |
| H | 0.533048  | -0.445808 | -1.430976 |
| H | 2.750992  | -1.773251 | -0.400987 |
| H | 1.578248  | -1.332283 | 0.923766  |
| H | 3.488070  | 0.784818  | -0.146721 |
| H | 1.022055  | 2.031220  | 0.272328  |
| C | -1.038971 | -0.037677 | -0.019673 |
| F | -1.478855 | -1.302049 | 0.072327  |
| F | -1.224004 | 0.534230  | 1.177197  |
| F | -1.869156 | 0.590385  | -0.874933 |

TS-con-out-3-CHO-Acetone  
SCF Energy: -269.230844881  
ZPE-corrected Energy: -269.136539  
 $\Delta U$ : -269.130947  
 $\Delta H$ : -269.130003  
 $\Delta G$ : -269.165743

Num. Imaginary Frequencies: 1

Imaginary Frequency: -659.7457

|   |           |           |           |
|---|-----------|-----------|-----------|
| C | 0.192173  | 0.159580  | 0.383859  |
| C | -1.399005 | -1.109196 | -0.172189 |
| C | -1.964790 | 0.185856  | -0.033730 |
| C | -0.884293 | 1.022270  | 0.014496  |
| H | 0.142504  | -0.393486 | 1.313056  |
| H | -1.817252 | -1.991013 | 0.308482  |
| H | -0.781755 | -1.318599 | -1.032458 |
| H | -3.014841 | 0.403931  | 0.111537  |
| H | -0.811483 | 2.080585  | -0.202442 |
| C | 1.541008  | 0.324988  | -0.171407 |
| O | 2.462331  | -0.436068 | 0.025263  |
| H | 1.673625  | 1.206134  | -0.826455 |

TS-con-out-3-CHO-Acetonitrile  
SCF Energy: -269.231077504  
ZPE-corrected Energy: -269.136776  
 $\Delta U$ : -269.131184  
 $\Delta H$ : -269.130240  
 $\Delta G$ : -269.165980

Num. Imaginary Frequencies: 1

Imaginary Frequency: -659.7557

|   |           |           |           |
|---|-----------|-----------|-----------|
| C | 0.192268  | 0.159465  | 0.383859  |
| C | -1.399129 | -1.109236 | -0.172160 |
| C | -1.964730 | 0.185967  | -0.033760 |
| C | -0.884211 | 1.022288  | 0.014517  |
| H | 0.142598  | -0.393597 | 1.313084  |
| H | -1.817470 | -1.990862 | 0.308748  |
| H | -0.781992 | -1.318728 | -1.032500 |
| H | -3.014817 | 0.403989  | 0.111289  |
| H | -0.811299 | 2.080685  | -0.201955 |
| C | 1.540779  | 0.324991  | -0.171470 |
| O | 2.462477  | -0.436031 | 0.025255  |
| H | 1.673304  | 1.205919  | -0.826621 |

TS-con-out-3-CHO-Dichloromethane  
SCF Energy: -269.230175504  
ZPE-corrected Energy: -269.135857  
 $\Delta U$ : -269.130266  
 $\Delta H$ : -269.129322  
 $\Delta G$ : -269.165064

Num. Imaginary Frequencies: 1

Imaginary Frequency: -659.8378

|   |           |           |           |
|---|-----------|-----------|-----------|
| C | 0.191869  | 0.160075  | 0.384085  |
| C | -1.398457 | -1.109129 | -0.172169 |
| C | -1.964991 | 0.185452  | -0.033711 |
| C | -0.884560 | 1.022167  | 0.014462  |
| H | 0.142496  | -0.392614 | 1.313444  |
| H | -1.816535 | -1.991483 | 0.307748  |
| H | -0.780608 | -1.318134 | -1.032071 |
| H | -3.015112 | 0.403415  | 0.111171  |
| H | -0.812018 | 2.080196  | -0.204060 |
| C | 1.541539  | 0.324959  | -0.171126 |
| O | 2.461911  | -0.436136 | 0.025089  |
| H | 1.674091  | 1.206561  | -0.826190 |

TS-con-out-3-CHO-DMSO  
SCF Energy: -269.231153534  
ZPE-corrected Energy: -269.136854  
 $\Delta U$ : -269.131262  
 $\Delta H$ : -269.130318  
 $\Delta G$ : -269.166057

Num. Imaginary Frequencies: 1

Imaginary Frequency: -659.7624

|   |           |           |           |
|---|-----------|-----------|-----------|
| C | 0.192295  | 0.159457  | 0.383878  |
| C | -1.399124 | -1.109260 | -0.172147 |
| C | -1.964711 | 0.185977  | -0.033782 |
| C | -0.884203 | 1.022293  | 0.014526  |
| H | 0.142630  | -0.393593 | 1.313120  |
| H | -1.817468 | -1.990831 | 0.308846  |
| H | -0.782016 | -1.318768 | -1.032508 |
| H | -3.014815 | 0.403959  | 0.111184  |
| H | -0.811278 | 2.080714  | -0.201820 |
| C | 1.540692  | 0.325001  | -0.171490 |
| O | 2.462509  | -0.436017 | 0.025246  |
| H | 1.673181  | 1.205839  | -0.826702 |

TS-con-out-3-CHO-Gas  
SCF Energy: -269.224281867  
ZPE-corrected Energy: -269.129933  
 $\Delta U$ : -269.124333  
 $\Delta H$ : -269.123388  
 $\Delta G$ : -269.159181

Num. Imaginary Frequencies: 1

Imaginary Frequency: -660.9785

|   |           |           |           |
|---|-----------|-----------|-----------|
| C | 0.190531  | 0.161562  | 0.383760  |
| C | -1.398493 | -1.107591 | -0.173181 |
| C | -1.966613 | 0.184679  | -0.031596 |
| C | -0.885211 | 1.021539  | 0.015528  |
| H | 0.143692  | -0.388931 | 1.314068  |
| H | -1.818434 | -1.993362 | 0.299552  |
| H | -0.778986 | -1.314083 | -1.032242 |
| H | -3.016404 | 0.403712  | 0.114500  |
| H | -0.812059 | 2.077237  | -0.214534 |
| C | 1.547026  | 0.322780  | -0.172569 |
| O | 2.460111  | -0.435948 | 0.027337  |
| H | 1.677864  | 1.205193  | -0.831688 |

TS-con-out-3-CHO-n-Hexane  
SCF Energy: -269.226780851  
ZPE-corrected Energy: -269.132434  
 $\Delta U$ : -269.126839  
 $\Delta H$ : -269.125894  
 $\Delta G$ : -269.161663

Num. Imaginary Frequencies: 1

Imaginary Frequency: -660.4193

|   |           |           |           |
|---|-----------|-----------|-----------|
| C | 0.190876  | 0.161414  | 0.384640  |
| C | -1.397748 | -1.108466 | -0.172420 |
| C | -1.965736 | 0.184609  | -0.033314 |
| C | -0.885079 | 1.021873  | 0.014686  |
| H | 0.142518  | -0.389876 | 1.314556  |
| H | -1.816656 | -1.992640 | 0.303861  |
| H | -0.777968 | -1.316458 | -1.031020 |
| H | -3.015808 | 0.402883  | 0.111826  |
| H | -0.812486 | 2.078463  | -0.211170 |
| C | 1.544628  | 0.324306  | -0.170799 |
| O | 2.460227  | -0.436611 | 0.025131  |
| H | 1.676930  | 1.208095  | -0.825851 |

TS-con-out-3-CHO-Water  
SCF Energy: -269.231252599  
ZPE-corrected Energy: -269.136955  
 $\Delta U$ : -269.131363  
 $\Delta H$ : -269.130419  
 $\Delta G$ : -269.166158

Num. Imaginary Frequencies: 1

Imaginary Frequency: -659.7734

|   |           |           |           |
|---|-----------|-----------|-----------|
| C | 0.192325  | 0.159484  | 0.383927  |
| C | -1.399066 | -1.109302 | -0.172126 |
| C | -1.964684 | 0.185961  | -0.033825 |
| C | -0.884215 | 1.022302  | 0.014534  |
| H | 0.142668  | -0.393542 | 1.313196  |
| H | -1.817379 | -1.990813 | 0.308990  |
| H | -0.781989 | -1.318823 | -1.032513 |
| H | -3.014818 | 0.403866  | 0.111019  |
| H | -0.811297 | 2.080747  | -0.201678 |
| C | 1.540570  | 0.325032  | -0.171510 |
| O | 2.462527  | -0.436004 | 0.025225  |
| H | 1.673019  | 1.205740  | -0.826814 |

TS-con-out-3-COMe-Acetone  
SCF Energy: -308.550213279  
ZPE-corrected Energy: -308.427811  
 $\Delta U$ : -308.420730  
 $\Delta H$ : -308.419785  
 $\Delta G$ : -308.459368

Num. Imaginary Frequencies: 1

Imaginary Frequency: -652.5222

|   |           |           |           |
|---|-----------|-----------|-----------|
| C | 0.164878  | -0.211301 | -0.490968 |
| C | 1.891148  | -0.860421 | 0.554800  |
| C | 2.226486  | 0.392093  | -0.019369 |
| C | 1.024812  | 0.922991  | -0.403616 |
| H | 0.428766  | -1.019494 | -1.160120 |
| H | 2.514153  | -1.745902 | 0.447869  |
| H | 1.222324  | -0.882741 | 1.401736  |
| H | 3.229795  | 0.757928  | -0.195871 |
| H | 0.748789  | 1.956097  | -0.573071 |
| C | -1.264955 | -0.213488 | -0.099602 |
| O | -1.927860 | -1.229576 | -0.184684 |
| C | -1.842883 | 1.069534  | 0.434280  |
| H | -1.338559 | 1.340961  | 1.362905  |
| H | -1.672137 | 1.883246  | -0.272273 |
| H | -2.907162 | 0.950060  | 0.613158  |

TS-con-out-3-COMe-Acetonitrile  
SCF Energy: -308.550473739  
ZPE-corrected Energy: -308.428078  
 $\Delta U$ : -308.420997  
 $\Delta H$ : -308.420053  
 $\Delta G$ : -308.459634  
Num. Imaginary Frequencies: 1  
Imaginary Frequency: -652.5274

|   |           |           |           |
|---|-----------|-----------|-----------|
| C | 0.164692  | -0.211851 | -0.490901 |
| C | 1.890865  | -0.860067 | 0.555966  |
| C | 2.226437  | 0.391644  | -0.019912 |
| C | 1.024955  | 0.922376  | -0.404879 |
| H | 0.428456  | -1.020848 | -1.159159 |
| H | 2.513731  | -1.745770 | 0.450141  |
| H | 1.222026  | -0.880998 | 1.402950  |
| H | 3.229863  | 0.756991  | -0.196744 |
| H | 0.749278  | 1.955274  | -0.576092 |
| C | -1.264949 | -0.213115 | -0.099672 |
| O | -1.928721 | -1.228920 | -0.185482 |
| C | -1.841936 | 1.069674  | 0.435221  |
| H | -1.338122 | 1.339015  | 1.364733  |
| H | -1.669287 | 1.884219  | -0.269881 |
| H | -2.906560 | 0.951502  | 0.612966  |



TS-con-out-3-COMe-Dichloromethane

SCF Energy: -308.549468803

ZPE-corrected Energy: -308.427044

$\Delta U$ : -308.419964

$\Delta H$ : -308.419019

$\Delta G$ : -308.458601

Num. Imaginary Frequencies: 1

Imaginary Frequency: -652.5036

|   |           |           |           |
|---|-----------|-----------|-----------|
| C | 0.165386  | -0.209839 | -0.491155 |
| C | 1.891874  | -0.861304 | 0.551787  |
| C | 2.226640  | 0.393257  | -0.017954 |
| C | 1.024473  | 0.924586  | -0.400350 |
| H | 0.429571  | -1.015940 | -1.162631 |
| H | 2.515261  | -1.746202 | 0.442046  |
| H | 1.223087  | -0.887223 | 1.398590  |
| H | 3.229647  | 0.760361  | -0.193593 |
| H | 0.747534  | 1.958225  | -0.565158 |
| C | -1.264989 | -0.214492 | -0.099422 |
| O | -1.925552 | -1.231287 | -0.182620 |
| C | -1.845437 | 1.069148  | 0.431835  |
| H | -1.339638 | 1.346244  | 1.357968  |
| H | -1.679997 | 1.880608  | -0.278636 |
| H | -2.908731 | 0.946085  | 0.613940  |

TS-con-out-3-COMe-DMSO  
SCF Energy: -308.550559081  
ZPE-corrected Energy: -308.428166  
 $\Delta U$ : -308.421085  
 $\Delta H$ : -308.420141  
 $\Delta G$ : -308.459723

Num. Imaginary Frequencies: 1

Imaginary Frequency: -652.5286

|   |           |           |           |
|---|-----------|-----------|-----------|
| C | 0.164630  | -0.212036 | -0.490878 |
| C | 1.890769  | -0.859945 | 0.556360  |
| C | 2.226422  | 0.391493  | -0.020096 |
| C | 1.025005  | 0.922168  | -0.405305 |
| H | 0.428351  | -1.021303 | -1.158835 |
| H | 2.513589  | -1.745723 | 0.450911  |
| H | 1.221927  | -0.880408 | 1.403361  |
| H | 3.229887  | 0.756674  | -0.197040 |
| H | 0.749443  | 1.954995  | -0.577110 |
| C | -1.264948 | -0.212990 | -0.099695 |
| O | -1.929010 | -1.228699 | -0.185751 |
| C | -1.841620 | 1.069721  | 0.435539  |
| H | -1.337973 | 1.338368  | 1.365343  |
| H | -1.668344 | 1.884543  | -0.269079 |
| H | -2.906358 | 0.951979  | 0.612912  |

TS-con-out-3-COMe-Gas  
SCF Energy: -308.543123289  
ZPE-corrected Energy: -308.420535  
 $\Delta U$ : -308.413455  
 $\Delta H$ : -308.412511  
 $\Delta G$ : -308.452090

Num. Imaginary Frequencies: 1

Imaginary Frequency: -652.9253

|   |           |           |           |
|---|-----------|-----------|-----------|
| C | 0.168562  | -0.203101 | -0.493269 |
| C | 1.893205  | -0.863182 | 0.541880  |
| C | 2.228520  | 0.397137  | -0.012308 |
| C | 1.025047  | 0.930290  | -0.389708 |
| H | 0.432281  | -1.001809 | -1.173184 |
| H | 2.518634  | -1.746259 | 0.426611  |
| H | 1.222798  | -0.900896 | 1.386659  |
| H | 3.230716  | 0.768714  | -0.183412 |
| H | 0.744099  | 1.966231  | -0.532500 |
| C | -1.266010 | -0.219838 | -0.099117 |
| O | -1.913964 | -1.237659 | -0.175410 |
| C | -1.858261 | 1.067174  | 0.423342  |
| H | -1.340989 | 1.375118  | 1.333247  |
| H | -1.727665 | 1.867541  | -0.307224 |
| H | -2.914537 | 0.921755  | 0.628159  |

TS-con-out-3-COMe-n-Hexane  
SCF Energy: -308.545778834  
ZPE-corrected Energy: -308.423246  
 $\Delta U$ : -308.416168  
 $\Delta H$ : -308.415224  
 $\Delta G$ : -308.454793

Num. Imaginary Frequencies: 1

Imaginary Frequency: -652.6004

|   |           |           |           |
|---|-----------|-----------|-----------|
| C | 0.167435  | -0.204893 | -0.492318 |
| C | 1.893485  | -0.863348 | 0.543262  |
| C | 2.227628  | 0.396566  | -0.013533 |
| C | 1.024193  | 0.929265  | -0.391130 |
| H | 0.431912  | -1.004814 | -1.170705 |
| H | 2.518279  | -1.746606 | 0.427050  |
| H | 1.224104  | -0.899478 | 1.389024  |
| H | 3.229850  | 0.767371  | -0.186074 |
| H | 0.744244  | 1.964591  | -0.540049 |
| C | -1.265451 | -0.218173 | -0.099034 |
| O | -1.917355 | -1.236440 | -0.176569 |
| C | -1.854485 | 1.067755  | 0.424710  |
| H | -1.341610 | 1.366064  | 1.340276  |
| H | -1.711411 | 1.871166  | -0.299960 |
| H | -2.913362 | 0.930192  | 0.621249  |

TS-con-out-3-COMe-Water  
SCF Energy: -308.550670442  
ZPE-corrected Energy: -308.428280  
 $\Delta U$ : -308.421199  
 $\Delta H$ : -308.420255  
 $\Delta G$ : -308.459838

Num. Imaginary Frequencies: 1

Imaginary Frequency: -652.5297

|   |           |           |           |
|---|-----------|-----------|-----------|
| C | 0.164549  | -0.212281 | -0.490848 |
| C | 1.890643  | -0.859783 | 0.556885  |
| C | 2.226403  | 0.391292  | -0.020340 |
| C | 1.025072  | 0.921891  | -0.405873 |
| H | 0.428211  | -1.021907 | -1.158404 |
| H | 2.513402  | -1.745659 | 0.451935  |
| H | 1.221796  | -0.879623 | 1.403908  |
| H | 3.229920  | 0.756254  | -0.197433 |
| H | 0.749662  | 1.954625  | -0.578460 |
| C | -1.264946 | -0.212825 | -0.099726 |
| O | -1.929391 | -1.228405 | -0.186110 |
| C | -1.841203 | 1.069782  | 0.435960  |
| H | -1.337775 | 1.337513  | 1.366148  |
| H | -1.667103 | 1.884970  | -0.268018 |
| H | -2.906090 | 0.952607  | 0.612848  |

TS-con-out-3-COOH-Acetone  
SCF Energy: -344.498959600  
ZPE-corrected Energy: -344.398630  
 $\Delta U$ : -344.392309  
 $\Delta H$ : -344.391365  
 $\Delta G$ : -344.429347

Num. Imaginary Frequencies: 1

Imaginary Frequency: -653.3546

|   |           |           |           |
|---|-----------|-----------|-----------|
| C | 0.145456  | -0.186434 | -0.472744 |
| C | 1.870454  | -0.910221 | 0.523569  |
| C | 2.228810  | 0.343715  | -0.033163 |
| C | 1.034967  | 0.919792  | -0.374753 |
| H | 0.356534  | -0.981724 | -1.171445 |
| H | 2.464959  | -1.810556 | 0.383054  |
| H | 1.222256  | -0.930791 | 1.386173  |
| H | 3.238186  | 0.683471  | -0.225141 |
| H | 0.776027  | 1.961116  | -0.511687 |
| C | -1.278694 | -0.136954 | -0.080395 |
| O | -2.060424 | -1.048140 | -0.213239 |
| O | -1.626496 | 1.035583  | 0.472650  |
| H | -2.568567 | 0.999562  | 0.688687  |

TS-con-out-3-COOH-Acetonitrile  
SCF Energy: -344.499218704  
ZPE-corrected Energy: -344.398902  
 $\Delta U$ : -344.392581  
 $\Delta H$ : -344.391637  
 $\Delta G$ : -344.429618

Num. Imaginary Frequencies: 1

Imaginary Frequency: -653.2859

|   |           |           |           |
|---|-----------|-----------|-----------|
| C | 0.145353  | -0.186583 | -0.472656 |
| C | 1.870512  | -0.910110 | 0.523916  |
| C | 2.228796  | 0.343651  | -0.033310 |
| C | 1.034989  | 0.919655  | -0.375114 |
| H | 0.356472  | -0.982137 | -1.171069 |
| H | 2.464962  | -1.810470 | 0.383486  |
| H | 1.222303  | -0.930397 | 1.386532  |
| H | 3.238189  | 0.683173  | -0.225591 |
| H | 0.776352  | 1.960937  | -0.513051 |
| C | -1.278681 | -0.136754 | -0.080348 |
| O | -2.060701 | -1.047922 | -0.213633 |
| O | -1.626262 | 1.035377  | 0.473074  |
| H | -2.568386 | 1.000094  | 0.689228  |

TS-con-out-3-COOH-Dichloromethane

SCF Energy: -344.498209651

ZPE-corrected Energy: -344.397844

$\Delta U$ : -344.391524

$\Delta H$ : -344.390580

$\Delta G$ : -344.428565

Num. Imaginary Frequencies: 1

Imaginary Frequency: -653.5522

|   |           |           |           |
|---|-----------|-----------|-----------|
| C | 0.145756  | -0.185974 | -0.473038 |
| C | 1.870272  | -0.910564 | 0.522531  |
| C | 2.228840  | 0.343906  | -0.032701 |
| C | 1.034900  | 0.920212  | -0.373666 |
| H | 0.356737  | -0.980451 | -1.172627 |
| H | 2.464965  | -1.810805 | 0.381739  |
| H | 1.222071  | -0.932001 | 1.385077  |
| H | 3.238168  | 0.684337  | -0.223777 |
| H | 0.775089  | 1.961662  | -0.507653 |
| C | -1.278726 | -0.137537 | -0.080549 |
| O | -2.059576 | -1.048818 | -0.212050 |
| O | -1.627195 | 1.036185  | 0.471385  |
| H | -2.569114 | 0.998056  | 0.687089  |

TS-con-out-3-COOH-DMSO  
SCF Energy: -344.499303218  
ZPE-corrected Energy: -344.398991  
 $\Delta U$ : -344.392670  
 $\Delta H$ : -344.391726  
 $\Delta G$ : -344.429707

Num. Imaginary Frequencies: 1

Imaginary Frequency: -653.2633

|   |           |           |           |
|---|-----------|-----------|-----------|
| C | 0.145318  | -0.186631 | -0.472628 |
| C | 1.870531  | -0.910074 | 0.524031  |
| C | 2.228791  | 0.343630  | -0.033358 |
| C | 1.034996  | 0.919610  | -0.375232 |
| H | 0.356452  | -0.982271 | -1.170947 |
| H | 2.464963  | -1.810441 | 0.383629  |
| H | 1.222317  | -0.930267 | 1.386650  |
| H | 3.238191  | 0.683074  | -0.225738 |
| H | 0.776459  | 1.960879  | -0.513499 |
| C | -1.278677 | -0.136688 | -0.080333 |
| O | -2.060792 | -1.047851 | -0.213762 |
| O | -1.626185 | 1.035310  | 0.473214  |
| H | -2.568325 | 1.000267  | 0.689406  |

TS-con-out-3-COOH-Gas  
SCF Energy: -344.491362180  
ZPE-corrected Energy: -344.390722  
 $\Delta U$ : -344.384405  
 $\Delta H$ : -344.383460  
 $\Delta G$ : -344.421482

Num. Imaginary Frequencies: 1

Imaginary Frequency: -654.9955

|   |           |           |           |
|---|-----------|-----------|-----------|
| C | 0.147787  | -0.182095 | -0.476299 |
| C | 1.868415  | -0.913220 | 0.514767  |
| C | 2.228908  | 0.345062  | -0.028958 |
| C | 1.034403  | 0.923252  | -0.365677 |
| H | 0.358195  | -0.969923 | -1.183176 |
| H | 2.465555  | -1.812287 | 0.373139  |
| H | 1.219284  | -0.941094 | 1.376220  |
| H | 3.238050  | 0.690383  | -0.212299 |
| H | 0.767555  | 1.965402  | -0.476114 |
| C | -1.279240 | -0.142272 | -0.081923 |
| O | -2.052807 | -1.053726 | -0.202685 |
| O | -1.631965 | 1.041155  | 0.462106  |
| H | -2.572100 | 0.983733  | 0.675399  |

TS-con-out-3-COOH-n-Hexane  
SCF Energy: -344.494315724  
ZPE-corrected Energy: -344.393787  
 $\Delta U$ : -344.387468  
 $\Delta H$ : -344.386524  
 $\Delta G$ : -344.424534

Num. Imaginary Frequencies: 1

Imaginary Frequency: -654.4367

|   |           |           |           |
|---|-----------|-----------|-----------|
| C | 0.147040  | -0.183651 | -0.474797 |
| C | 1.869215  | -0.912161 | 0.517858  |
| C | 2.228928  | 0.344624  | -0.030501 |
| C | 1.034635  | 0.922106  | -0.368780 |
| H | 0.357619  | -0.974223 | -1.178669 |
| H | 2.465120  | -1.811829 | 0.376315  |
| H | 1.220637  | -0.937458 | 1.379882  |
| H | 3.238121  | 0.687995  | -0.217143 |
| H | 0.770724  | 1.964049  | -0.488800 |
| C | -1.278978 | -0.140326 | -0.081369 |
| O | -2.055526 | -1.051839 | -0.206505 |
| O | -1.630232 | 1.039089  | 0.465743  |
| H | -2.571191 | 0.989917  | 0.680037  |

TS-con-out-3-COOH-Water  
SCF Energy: -344.499413210  
ZPE-corrected Energy: -344.399107  
 $\Delta U$ : -344.392785  
 $\Delta H$ : -344.391841  
 $\Delta G$ : -344.429822

Num. Imaginary Frequencies: 1

Imaginary Frequency: -653.2337

|   |           |           |           |
|---|-----------|-----------|-----------|
| C | 0.145274  | -0.186694 | -0.472592 |
| C | 1.870555  | -0.910026 | 0.524181  |
| C | 2.228785  | 0.343602  | -0.033420 |
| C | 1.035006  | 0.919552  | -0.375387 |
| H | 0.356425  | -0.982446 | -1.170789 |
| H | 2.464964  | -1.810404 | 0.383817  |
| H | 1.222334  | -0.930098 | 1.386803  |
| H | 3.238192  | 0.682944  | -0.225930 |
| H | 0.776600  | 1.960802  | -0.514083 |
| C | -1.278672 | -0.136602 | -0.080314 |
| O | -2.060910 | -1.047757 | -0.213931 |
| O | -1.626084 | 1.035222  | 0.473397  |
| H | -2.568246 | 1.000491  | 0.689640  |



TS-con-out-3-Me-Acetone  
SCF Energy: -195.209798830  
ZPE-corrected Energy: -195.097539  
 $\Delta U$ : -195.092150  
 $\Delta H$ : -195.091205  
 $\Delta G$ : -195.125990

Num. Imaginary Frequencies: 1

Imaginary Frequency: -649.8397

|   |           |           |           |
|---|-----------|-----------|-----------|
| C | 0.601212  | -0.018144 | 0.402822  |
| C | -1.211687 | -0.982970 | -0.119355 |
| C | -1.515452 | 0.398635  | -0.052445 |
| C | -0.284330 | 1.006418  | -0.027748 |
| H | 0.402076  | -0.454142 | 1.370806  |
| H | -1.823382 | -1.746243 | 0.359093  |
| H | -0.624756 | -1.345156 | -0.950499 |
| H | -2.500625 | 0.834748  | 0.063242  |
| H | 0.013793  | 1.996124  | -0.355616 |
| C | 1.991470  | -0.179691 | -0.136502 |
| H | 2.661945  | -0.670898 | 0.565715  |
| H | 1.984659  | -0.761600 | -1.060921 |
| H | 2.399020  | 0.801682  | -0.392455 |

TS-con-out-3-Me-Acetonitrile  
SCF Energy: -195.209862523  
ZPE-corrected Energy: -195.097615  
 $\Delta U$ : -195.092224  
 $\Delta H$ : -195.091280  
 $\Delta G$ : -195.126068

Num. Imaginary Frequencies: 1

Imaginary Frequency: -649.8933

|   |           |           |           |
|---|-----------|-----------|-----------|
| C | 0.601187  | -0.017998 | 0.402840  |
| C | -1.211384 | -0.983091 | -0.119368 |
| C | -1.515539 | 0.398471  | -0.052512 |
| C | -0.284492 | 1.006571  | -0.027679 |
| H | 0.402055  | -0.454124 | 1.370787  |
| H | -1.822778 | -1.746525 | 0.359202  |
| H | -0.624142 | -1.345185 | -0.950351 |
| H | -2.500845 | 0.834345  | 0.063113  |
| H | 0.013578  | 1.996276  | -0.355624 |
| C | 1.991385  | -0.179619 | -0.136520 |
| H | 2.661816  | -0.670637 | 0.565861  |
| H | 1.984506  | -0.761839 | -1.060743 |
| H | 2.398870  | 0.801685  | -0.392812 |

TS-con-out-3-Me-Dichloromethane  
SCF Energy: -195.209617950  
ZPE-corrected Energy: -195.097327  
 $\Delta U$ : -195.091939  
 $\Delta H$ : -195.090995  
 $\Delta G$ : -195.125779

Num. Imaginary Frequencies: 1

Imaginary Frequency: -649.7993

|   |           |           |           |
|---|-----------|-----------|-----------|
| C | 0.601253  | -0.018341 | 0.402724  |
| C | -1.212190 | -0.982781 | -0.119320 |
| C | -1.515317 | 0.398844  | -0.052256 |
| C | -0.284127 | 1.006192  | -0.027933 |
| H | 0.402161  | -0.453921 | 1.370853  |
| H | -1.824296 | -1.745824 | 0.359004  |
| H | -0.626135 | -1.345082 | -0.950971 |
| H | -2.500237 | 0.835382  | 0.063505  |
| H | 0.013923  | 1.995923  | -0.355680 |
| C | 1.991677  | -0.179785 | -0.136428 |
| H | 2.662560  | -0.669724 | 0.566328  |
| H | 1.985364  | -0.762917 | -1.060086 |
| H | 2.398876  | 0.801386  | -0.393672 |

TS-con-out-3-Me-DMSO  
SCF Energy: -195.209883339  
ZPE-corrected Energy: -195.097642  
 $\Delta U$ : -195.092250  
 $\Delta H$ : -195.091306  
 $\Delta G$ : -195.126103

Num. Imaginary Frequencies: 1

Imaginary Frequency: -649.8470

|   |           |           |           |
|---|-----------|-----------|-----------|
| C | 0.601220  | -0.017848 | 0.402568  |
| C | -1.211377 | -0.983219 | -0.119418 |
| C | -1.515693 | 0.398393  | -0.052325 |
| C | -0.284626 | 1.006644  | -0.027844 |
| H | 0.402225  | -0.453855 | 1.370617  |
| H | -1.822379 | -1.746828 | 0.359369  |
| H | -0.624218 | -1.345131 | -0.950557 |
| H | -2.500979 | 0.834228  | 0.063662  |
| H | 0.013075  | 1.996389  | -0.355973 |
| C | 1.991528  | -0.179567 | -0.136442 |
| H | 2.661143  | -0.671302 | 0.566248  |
| H | 1.984958  | -0.761531 | -1.060785 |
| H | 2.399863  | 0.801611  | -0.391817 |

TS-con-out-3-Me-Gas  
SCF Energy: -195.208180659  
ZPE-corrected Energy: -195.095670  
 $\Delta U$ : -195.090284  
 $\Delta H$ : -195.089340  
 $\Delta G$ : -195.124166

Num. Imaginary Frequencies: 1

Imaginary Frequency: -650.0843

|   |           |           |           |
|---|-----------|-----------|-----------|
| C | 0.601352  | -0.020388 | 0.401739  |
| C | -1.216412 | -0.981063 | -0.119224 |
| C | -1.514213 | 0.400812  | -0.050686 |
| C | -0.282249 | 1.004171  | -0.029484 |
| H | 0.402637  | -0.453535 | 1.370614  |
| H | -1.831566 | -1.742254 | 0.358248  |
| H | -0.637200 | -1.344457 | -0.954721 |
| H | -2.496977 | 0.840772  | 0.066493  |
| H | 0.015620  | 1.994205  | -0.355622 |
| C | 1.993356  | -0.180455 | -0.135727 |
| H | 2.667291  | -0.661364 | 0.570646  |
| H | 1.991614  | -0.771600 | -1.054345 |
| H | 2.397580  | 0.799769  | -0.401023 |

TS-con-out-3-Me-n-Hexane  
SCF Energy: -195.208756491  
ZPE-corrected Energy: -195.096328  
 $\Delta U$ : -195.090943  
 $\Delta H$ : -195.089999  
 $\Delta G$ : -195.124801

Num. Imaginary Frequencies: 1

Imaginary Frequency: -649.7723

|   |           |           |           |
|---|-----------|-----------|-----------|
| C | 0.601378  | -0.019577 | 0.402203  |
| C | -1.214878 | -0.981718 | -0.119238 |
| C | -1.514608 | 0.400086  | -0.051327 |
| C | -0.282931 | 1.004931  | -0.028875 |
| H | 0.402456  | -0.453595 | 1.370810  |
| H | -1.829038 | -1.743583 | 0.358416  |
| H | -0.632880 | -1.344692 | -0.953167 |
| H | -2.498189 | 0.838795  | 0.065272  |
| H | 0.015016  | 1.994829  | -0.355702 |
| C | 1.992704  | -0.180273 | -0.136040 |
| H | 2.665044  | -0.666363 | 0.568169  |
| H | 1.988805  | -0.766599 | -1.057708 |
| H | 2.398797  | 0.800516  | -0.396423 |

TS-con-out-3-Me-Water  
SCF Energy: -195.209910749  
ZPE-corrected Energy: -195.097671  
 $\Delta U$ : -195.092280  
 $\Delta H$ : -195.091336  
 $\Delta G$ : -195.126126

Num. Imaginary Frequencies: 1

Imaginary Frequency: -649.9525

|   |           |           |           |
|---|-----------|-----------|-----------|
| C | 0.601152  | -0.017872 | 0.402911  |
| C | -1.211078 | -0.983191 | -0.119362 |
| C | -1.515601 | 0.398334  | -0.052590 |
| C | -0.284625 | 1.006661  | -0.027627 |
| H | 0.402046  | -0.454060 | 1.370849  |
| H | -1.822240 | -1.746756 | 0.359287  |
| H | -0.623634 | -1.345201 | -0.950255 |
| H | -2.501011 | 0.834025  | 0.062953  |
| H | 0.013381  | 1.996396  | -0.355565 |
| C | 1.991288  | -0.179530 | -0.136547 |
| H | 2.662183  | -0.668964 | 0.566493  |
| H | 1.984409  | -0.763416 | -1.059726 |
| H | 2.398049  | 0.801565  | -0.394747 |

TS-con-out-3-NH2-Acetone  
SCF Energy: -211.273807716  
ZPE-corrected Energy: -211.171897  
 $\Delta U$ : -211.166951  
 $\Delta H$ : -211.166006  
 $\Delta G$ : -211.199314

Num. Imaginary Frequencies: 1

Imaginary Frequency: -595.3618

|   |           |           |           |
|---|-----------|-----------|-----------|
| C | 0.634946  | -0.010692 | 0.391554  |
| C | -1.136336 | -1.007069 | -0.119602 |
| C | -1.477324 | 0.375143  | -0.054064 |
| C | -0.277602 | 1.024579  | -0.005720 |
| H | 0.533910  | -0.416374 | 1.387021  |
| H | -1.742056 | -1.777326 | 0.354319  |
| H | -0.590309 | -1.352544 | -0.985969 |
| H | -2.471826 | 0.797135  | 0.044006  |
| H | 0.000370  | 2.037163  | -0.273652 |
| N | 1.897966  | -0.115311 | -0.131551 |
| H | 2.010618  | 0.047786  | -1.118433 |
| H | 2.511430  | -0.820435 | 0.240562  |

TS-con-out-3-NH2-Acetonitrile  
SCF Energy: -211.273991501  
ZPE-corrected Energy: -211.172090  
 $\Delta U$ : -211.167145  
 $\Delta H$ : -211.166200  
 $\Delta G$ : -211.199507

Num. Imaginary Frequencies: 1

Imaginary Frequency: -595.7935

|   |           |           |           |
|---|-----------|-----------|-----------|
| C | 0.634849  | -0.010333 | 0.391647  |
| C | -1.135493 | -1.007315 | -0.119547 |
| C | -1.477513 | 0.374741  | -0.054137 |
| C | -0.277999 | 1.024715  | -0.005723 |
| H | 0.533932  | -0.415639 | 1.387314  |
| H | -1.740551 | -1.778000 | 0.354544  |
| H | -0.589134 | -1.352477 | -0.985870 |
| H | -2.472275 | 0.796182  | 0.043861  |
| H | -0.000267 | 2.037163  | -0.274491 |
| N | 1.897897  | -0.114747 | -0.131446 |
| H | 2.009619  | 0.046302  | -1.118845 |
| H | 2.510333  | -0.821146 | 0.240172  |

TS-con-out-3-NH2-Dichloromethane  
SCF Energy: -211.273281376  
ZPE-corrected Energy: -211.171331  
 $\Delta U$ : -211.166387  
 $\Delta H$ : -211.165443  
 $\Delta G$ : -211.198747

Num. Imaginary Frequencies: 1

Imaginary Frequency: -594.2079

|   |           |           |           |
|---|-----------|-----------|-----------|
| C | 0.635015  | -0.011302 | 0.391244  |
| C | -1.138539 | -1.006316 | -0.119878 |
| C | -1.476959 | 0.376092  | -0.053699 |
| C | -0.276440 | 1.024176  | -0.006042 |
| H | 0.533032  | -0.417953 | 1.386150  |
| H | -1.745589 | -1.775718 | 0.353653  |
| H | -0.593021 | -1.352473 | -0.986206 |
| H | -2.470740 | 0.799258  | 0.045860  |
| H | 0.002376  | 2.036515  | -0.273772 |
| N | 1.898829  | -0.115974 | -0.131206 |
| H | 2.011833  | 0.047634  | -1.117865 |
| H | 2.511842  | -0.821345 | 0.240872  |

TS-con-out-3-NH2-DMSO  
SCF Energy: -211.274051648  
ZPE-corrected Energy: -211.172159  
 $\Delta U$ : -211.167212  
 $\Delta H$ : -211.166268  
 $\Delta G$ : -211.199575

Num. Imaginary Frequencies: 1

Imaginary Frequency: -596.0780

|   |           |           |           |
|---|-----------|-----------|-----------|
| C | 0.634822  | -0.010321 | 0.391787  |
| C | -1.135144 | -1.007359 | -0.119443 |
| C | -1.477624 | 0.374579  | -0.054325 |
| C | -0.277978 | 1.024938  | -0.005592 |
| H | 0.534487  | -0.415173 | 1.387719  |
| H | -1.740157 | -1.778126 | 0.354597  |
| H | -0.588857 | -1.352586 | -0.985813 |
| H | -2.472554 | 0.795606  | 0.043809  |
| H | -0.000265 | 2.037315  | -0.274654 |
| N | 1.897590  | -0.114829 | -0.131637 |
| H | 2.009184  | 0.046349  | -1.119025 |
| H | 2.510576  | -0.820605 | 0.240266  |

TS-con-out-3-NH2-Gas  
SCF Energy: -211.268824811  
ZPE-corrected Energy: -211.166599  
 $\Delta U$ : -211.161664  
 $\Delta H$ : -211.160720  
 $\Delta G$ : -211.194014

Num. Imaginary Frequencies: 1

Imaginary Frequency: -589.6049

|   |           |           |           |
|---|-----------|-----------|-----------|
| C | 0.634307  | -0.016064 | 0.389067  |
| C | -1.153927 | -1.000624 | -0.122577 |
| C | -1.474678 | 0.382805  | -0.050531 |
| C | -0.268198 | 1.020841  | -0.009176 |
| H | 0.525113  | -0.430867 | 1.379359  |
| H | -1.768548 | -1.764734 | 0.349081  |
| H | -0.611989 | -1.350708 | -0.988924 |
| H | -2.462989 | 0.813910  | 0.062194  |
| H | 0.016825  | 2.031544  | -0.274818 |
| N | 1.905600  | -0.120188 | -0.128457 |
| H | 2.020030  | 0.044583  | -1.113826 |
| H | 2.517337  | -0.824160 | 0.245436  |

TS-con-out-3-NH2-n-Hexane  
SCF Energy: -211.270673089  
ZPE-corrected Energy: -211.168551  
 $\Delta U$ : -211.163614  
 $\Delta H$ : -211.162670  
 $\Delta G$ : -211.195964

Num. Imaginary Frequencies: 1

Imaginary Frequency: -590.5015

|   |           |           |           |
|---|-----------|-----------|-----------|
| C | 0.634797  | -0.014130 | 0.389591  |
| C | -1.148106 | -1.002878 | -0.121363 |
| C | -1.475542 | 0.380165  | -0.051622 |
| C | -0.271286 | 1.022239  | -0.008343 |
| H | 0.528336  | -0.425143 | 1.381943  |
| H | -1.760363 | -1.768956 | 0.350431  |
| H | -0.604935 | -1.351471 | -0.987800 |
| H | -2.465912 | 0.808404  | 0.056129  |
| H | 0.011011  | 2.033982  | -0.273462 |
| N | 1.902895  | -0.118864 | -0.129354 |
| H | 2.017559  | 0.046631  | -1.114956 |
| H | 2.514856  | -0.823782 | 0.243610  |

TS-con-out-3-NH2-Water  
SCF Energy: -211.274130085  
ZPE-corrected Energy: -211.172243  
 $\Delta U$ : -211.167296  
 $\Delta H$ : -211.166352  
 $\Delta G$ : -211.199660

Num. Imaginary Frequencies: 1

Imaginary Frequency: -596.2596

|   |           |           |           |
|---|-----------|-----------|-----------|
| C | 0.634818  | -0.010238 | 0.391834  |
| C | -1.134847 | -1.007460 | -0.119409 |
| C | -1.477672 | 0.374448  | -0.054375 |
| C | -0.278142 | 1.024995  | -0.005532 |
| H | 0.534603  | -0.414979 | 1.387834  |
| H | -1.739678 | -1.778349 | 0.354675  |
| H | -0.588456 | -1.352587 | -0.985765 |
| H | -2.472703 | 0.795312  | 0.043544  |
| H | -0.000536 | 2.037378  | -0.274717 |
| N | 1.897492  | -0.114706 | -0.131671 |
| H | 2.008957  | 0.046295  | -1.119122 |
| H | 2.510430  | -0.820601 | 0.240142  |

TS-con-out-3-NO2-Acetone  
SCF Energy: -360.424575233  
ZPE-corrected Energy: -360.336373  
 $\Delta U$ : -360.330407  
 $\Delta H$ : -360.329463  
 $\Delta G$ : -360.366751

Num. Imaginary Frequencies: 1

Imaginary Frequency: -633.7762

|   |           |           |           |
|---|-----------|-----------|-----------|
| C | -0.104198 | -0.173015 | 0.425510  |
| C | -1.843081 | -0.925719 | -0.496014 |
| C | -2.178291 | 0.324334  | 0.074219  |
| C | -0.979155 | 0.931884  | 0.344878  |
| H | -0.186954 | -0.956826 | 1.159521  |
| H | -2.424476 | -1.826441 | -0.315009 |
| H | -1.233702 | -0.948939 | -1.386014 |
| H | -3.175990 | 0.641121  | 0.346856  |
| H | -0.724658 | 1.971282  | 0.492852  |
| N | 1.292908  | -0.027183 | 0.012596  |
| O | 1.616012  | 0.994045  | -0.560427 |
| O | 2.049460  | -0.948398 | 0.250685  |

TS-con-out-3-NO2-Acetonitrile  
SCF Energy: -360.424878082  
ZPE-corrected Energy: -360.336687  
 $\Delta U$ : -360.330721  
 $\Delta H$ : -360.329777  
 $\Delta G$ : -360.367060

Num. Imaginary Frequencies: 1

Imaginary Frequency: -633.5243

|   |           |           |           |
|---|-----------|-----------|-----------|
| C | -0.104142 | -0.173349 | 0.425410  |
| C | -1.843321 | -0.925548 | -0.496403 |
| C | -2.178258 | 0.324379  | 0.074344  |
| C | -0.979133 | 0.931694  | 0.345336  |
| H | -0.186820 | -0.957475 | 1.159096  |
| H | -2.424642 | -1.826255 | -0.315281 |
| H | -1.233840 | -0.948640 | -1.386341 |
| H | -3.175922 | 0.640984  | 0.347277  |
| H | -0.724971 | 1.970952  | 0.494980  |
| N | 1.292654  | -0.027185 | 0.012629  |
| O | 1.615785  | 0.993720  | -0.561232 |
| O | 2.050057  | -0.947760 | 0.251199  |



TS-con-out-3-NO2-Dichloromethane

SCF Energy: -360.423702846

ZPE-corrected Energy: -360.335471

$\Delta U$ : -360.329504

$\Delta H$ : -360.328560

$\Delta G$ : -360.365859

Num. Imaginary Frequencies: 1

Imaginary Frequency: -634.4637

|   |           |           |           |
|---|-----------|-----------|-----------|
| C | -0.104367 | -0.172124 | 0.425794  |
| C | -1.842335 | -0.926122 | -0.495004 |
| C | -2.178356 | 0.324158  | 0.073853  |
| C | -0.979180 | 0.932377  | 0.343691  |
| H | -0.187355 | -0.955035 | 1.160743  |
| H | -2.423952 | -1.826896 | -0.314427 |
| H | -1.233293 | -0.949615 | -1.385235 |
| H | -3.176078 | 0.641371  | 0.346046  |
| H | -0.723731 | 1.972141  | 0.487084  |
| N | 1.293608  | -0.027179 | 0.012497  |
| O | 1.616521  | 0.994930  | -0.558283 |
| O | 2.047801  | -0.950111 | 0.249321  |

TS-con-out-3-NO2-DMSO

SCF Energy: -360.424976841

ZPE-corrected Energy: -360.336789

$\Delta U$ : -360.330824

$\Delta H$ : -360.329879

$\Delta G$ : -360.367161

Num. Imaginary Frequencies: 1

Imaginary Frequency: -633.4728

|   |           |           |           |
|---|-----------|-----------|-----------|
| C | -0.104264 | -0.173332 | 0.425539  |
| C | -1.843595 | -0.925433 | -0.496492 |
| C | -2.178346 | 0.324446  | 0.074602  |
| C | -0.978932 | 0.931792  | 0.345091  |
| H | -0.186795 | -0.957485 | 1.159197  |
| H | -2.425682 | -1.825763 | -0.316039 |
| H | -1.233916 | -0.948276 | -1.386242 |
| H | -3.176007 | 0.640633  | 0.347934  |
| H | -0.724230 | 1.970970  | 0.494496  |
| N | 1.292684  | -0.027289 | 0.012613  |
| O | 1.615972  | 0.993598  | -0.561202 |
| O | 2.050111  | -0.947835 | 0.251191  |

TS-con-out-3-NO2-Gas  
SCF Energy: -360.415927028  
ZPE-corrected Energy: -360.327468  
 $\Delta U$ : -360.321506  
 $\Delta H$ : -360.320562  
 $\Delta G$ : -360.357894

Num. Imaginary Frequencies: 1

Imaginary Frequency: -637.9293

|   |           |           |           |
|---|-----------|-----------|-----------|
| C | -0.103975 | -0.166320 | 0.428918  |
| C | -1.837565 | -0.928370 | -0.488638 |
| C | -2.178645 | 0.323034  | 0.072838  |
| C | -0.978456 | 0.934680  | 0.336741  |
| H | -0.188986 | -0.944697 | 1.168493  |
| H | -2.421833 | -1.829494 | -0.314154 |
| H | -1.228009 | -0.952556 | -1.378424 |
| H | -3.177539 | 0.643826  | 0.337290  |
| H | -0.713769 | 1.976198  | 0.444271  |
| N | 1.299472  | -0.027336 | 0.011076  |
| O | 1.617350  | 1.002018  | -0.543653 |
| O | 2.035860  | -0.962027 | 0.239383  |

TS-con-out-3-NO2-n-Hexane  
SCF Energy: -360.419250345  
ZPE-corrected Energy: -360.330878  
 $\Delta U$ : -360.324913  
 $\Delta H$ : -360.323969  
 $\Delta G$ : -360.361296

Num. Imaginary Frequencies: 1

Imaginary Frequency: -636.9663

|   |           |           |           |
|---|-----------|-----------|-----------|
| C | -0.104496 | -0.168465 | 0.427594  |
| C | -1.839215 | -0.927615 | -0.491035 |
| C | -2.178565 | 0.323340  | 0.072872  |
| C | -0.978972 | 0.934039  | 0.339285  |
| H | -0.188545 | -0.948165 | 1.165864  |
| H | -2.422308 | -1.828616 | -0.313777 |
| H | -1.230369 | -0.951699 | -1.381371 |
| H | -3.176821 | 0.642599  | 0.341294  |
| H | -0.718514 | 1.975107  | 0.461365  |
| N | 1.297045  | -0.027202 | 0.011790  |
| O | 1.617518  | 0.999044  | -0.549391 |
| O | 2.040573  | -0.957369 | 0.243366  |

TS-con-out-3-NO2-Water  
SCF Energy: -360.425105762  
ZPE-corrected Energy: -360.336923  
 $\Delta U$ : -360.330957  
 $\Delta H$ : -360.330013  
 $\Delta G$ : -360.367292

Num. Imaginary Frequencies: 1

Imaginary Frequency: -633.3743

|   |           |           |           |
|---|-----------|-----------|-----------|
| C | -0.104226 | -0.173487 | 0.425487  |
| C | -1.843741 | -0.925359 | -0.496658 |
| C | -2.178317 | 0.324490  | 0.074642  |
| C | -0.978899 | 0.931711  | 0.345309  |
| H | -0.186723 | -0.957774 | 1.159010  |
| H | -2.425882 | -1.825611 | -0.316075 |
| H | -1.234016 | -0.948239 | -1.386359 |
| H | -3.175968 | 0.640603  | 0.348087  |
| H | -0.724334 | 1.970814  | 0.495505  |
| N | 1.292580  | -0.027292 | 0.012628  |
| O | 1.615867  | 0.993448  | -0.561573 |
| O | 2.050378  | -0.947558 | 0.251416  |

TS-con-out-3-OMe-Acetone  
SCF Energy: -270.436044502  
ZPE-corrected Energy: -270.318151  
 $\Delta U$ : -270.311924  
 $\Delta H$ : -270.310980  
 $\Delta G$ : -270.348056

Num. Imaginary Frequencies: 1

Imaginary Frequency: -593.0446

|   |           |           |           |
|---|-----------|-----------|-----------|
| C | -0.126409 | -0.193669 | 0.257151  |
| C | 1.459410  | 1.125472  | -0.160415 |
| C | 2.039861  | -0.146871 | 0.070627  |
| C | 0.993486  | -1.032202 | 0.013169  |
| H | -0.222352 | 0.304066  | 1.213892  |
| H | 1.836260  | 2.032528  | 0.307462  |
| H | 0.939645  | 1.289796  | -1.092825 |
| H | 3.068052  | -0.342117 | 0.353028  |
| H | 0.956552  | -2.087588 | -0.223073 |
| O | -1.283713 | -0.376913 | -0.406742 |
| C | -2.404274 | 0.309895  | 0.136497  |
| H | -2.604213 | -0.027695 | 1.154129  |
| H | -2.221262 | 1.385840  | 0.137372  |
| H | -3.255424 | 0.084727  | -0.498225 |

TS-con-out-3-OMe-Acetonitrile  
SCF Energy: -270.436179736  
ZPE-corrected Energy: -270.318299  
 $\Delta U$ : -270.312071  
 $\Delta H$ : -270.311127  
 $\Delta G$ : -270.348206

Num. Imaginary Frequencies: 1

Imaginary Frequency: -593.4298

|   |           |           |           |
|---|-----------|-----------|-----------|
| C | -0.126330 | -0.193704 | 0.257312  |
| C | 1.459223  | 1.125547  | -0.160392 |
| C | 2.039957  | -0.146768 | 0.070464  |
| C | 0.993620  | -1.032225 | 0.013230  |
| H | -0.222487 | 0.303964  | 1.214055  |
| H | 1.835847  | 2.032606  | 0.307629  |
| H | 0.939008  | 1.289971  | -1.092547 |
| H | 3.068231  | -0.341834 | 0.352724  |
| H | 0.956831  | -2.087687 | -0.222828 |
| O | -1.283570 | -0.376922 | -0.406863 |
| C | -2.404437 | 0.309816  | 0.136498  |
| H | -2.604903 | -0.028833 | 1.153620  |
| H | -2.220929 | 1.385629  | 0.138568  |
| H | -3.255241 | 0.085568  | -0.498991 |

TS-con-out-3-OMe-Dichloromethane  
SCF Energy: -270.435659536

ZPE-corrected Energy: -270.317730  
 $\Delta U$ : -270.311508  
 $\Delta H$ : -270.310564  
 $\Delta G$ : -270.347630

Num. Imaginary Frequencies: 1

Imaginary Frequency: -592.1193

|   |           |           |           |
|---|-----------|-----------|-----------|
| C | -0.126583 | -0.193618 | 0.256937  |
| C | 1.459941  | 1.125312  | -0.160471 |
| C | 2.039661  | -0.147174 | 0.071015  |
| C | 0.993134  | -1.032093 | 0.013095  |
| H | -0.222194 | 0.304092  | 1.213741  |
| H | 1.837578  | 2.032414  | 0.306764  |
| H | 0.941036  | 1.289240  | -1.093385 |
| H | 3.067767  | -0.342888 | 0.353257  |
| H | 0.955844  | -2.087166 | -0.224139 |
| O | -1.284204 | -0.377003 | -0.406404 |
| C | -2.403825 | 0.310178  | 0.136393  |
| H | -2.603937 | -0.026233 | 1.154543  |
| H | -2.221029 | 1.386290  | 0.136341  |
| H | -3.255393 | 0.084638  | -0.497709 |

TS-con-out-3-OMe-DMSO  
SCF Energy: -270.436224124  
ZPE-corrected Energy: -270.318348  
 $\Delta U$ : -270.312119  
 $\Delta H$ : -270.311175  
 $\Delta G$ : -270.348256

Num. Imaginary Frequencies: 1

Imaginary Frequency: -593.5450

|   |           |           |           |
|---|-----------|-----------|-----------|
| C | -0.126303 | -0.193670 | 0.257307  |
| C | 1.459168  | 1.125543  | -0.160388 |
| C | 2.039976  | -0.146752 | 0.070428  |
| C | 0.993646  | -1.032243 | 0.013232  |
| H | -0.222453 | 0.304034  | 1.214030  |
| H | 1.835645  | 2.032586  | 0.307772  |
| H | 0.938918  | 1.290039  | -1.092519 |
| H | 3.068229  | -0.341767 | 0.352819  |
| H | 0.956869  | -2.087742 | -0.222707 |
| O | -1.283469 | -0.376828 | -0.406918 |
| C | -2.404515 | 0.309726  | 0.136529  |
| H | -2.604619 | -0.028753 | 1.153762  |
| H | -2.221316 | 1.385575  | 0.138280  |
| H | -3.255353 | 0.085026  | -0.498745 |

TS-con-out-3-OMe-Gas  
SCF Energy: -270.432495619  
ZPE-corrected Energy: -270.314320  
 $\Delta U$ : -270.308124  
 $\Delta H$ : -270.307179  
 $\Delta G$ : -270.344201

Num. Imaginary Frequencies: 1

Imaginary Frequency: -587.3029

|   |           |           |           |
|---|-----------|-----------|-----------|
| C | -0.127696 | -0.192524 | 0.255173  |
| C | 1.466257  | 1.123740  | -0.161134 |
| C | 2.038187  | -0.150526 | 0.073786  |
| C | 0.989400  | -1.031456 | 0.011907  |
| H | -0.219951 | 0.306845  | 1.211547  |
| H | 1.850185  | 2.030127  | 0.302615  |
| H | 0.952963  | 1.286853  | -1.096962 |
| H | 3.064923  | -0.350847 | 0.356548  |
| H | 0.948485  | -2.085006 | -0.228845 |
| O | -1.289049 | -0.377226 | -0.403994 |
| C | -2.400648 | 0.312429  | 0.135768  |
| H | -2.608657 | -0.022529 | 1.154191  |
| H | -2.215104 | 1.389162  | 0.139588  |
| H | -3.253456 | 0.093223  | -0.499720 |

TS-con-out-3-OMe-n-Hexane  
SCF Energy: -270.433792904  
ZPE-corrected Energy: -270.315713  
 $\Delta U$ : -270.309507  
 $\Delta H$ : -270.308563  
 $\Delta G$ : -270.345596

Num. Imaginary Frequencies: 1

Imaginary Frequency: -588.8385

|   |           |           |           |
|---|-----------|-----------|-----------|
| C | -0.127377 | -0.193055 | 0.255730  |
| C | 1.463619  | 1.124415  | -0.160799 |
| C | 2.038761  | -0.149137 | 0.072797  |
| C | 0.990974  | -1.031660 | 0.012520  |
| H | -0.221075 | 0.305433  | 1.212396  |
| H | 1.845391  | 2.031191  | 0.303938  |
| H | 0.948453  | 1.287569  | -1.095712 |
| H | 3.066162  | -0.347677 | 0.354929  |
| H | 0.951550  | -2.085716 | -0.227282 |
| O | -1.287152 | -0.377309 | -0.405017 |
| C | -2.401863 | 0.311667  | 0.136093  |
| H | -3.254557 | 0.089226  | -0.498042 |
| H | -2.605889 | -0.023105 | 1.154795  |
| H | -2.217512 | 1.388173  | 0.137071  |

TS-con-out-3-OMe-Water  
SCF Energy: -270.436282066  
ZPE-corrected Energy: -270.318412  
 $\Delta U$ : -270.312181  
 $\Delta H$ : -270.311237  
 $\Delta G$ : -270.348323

Num. Imaginary Frequencies: 1

Imaginary Frequency: -593.6905

|   |           |           |           |
|---|-----------|-----------|-----------|
| C | -0.126255 | -0.193498 | 0.257240  |
| C | 1.459250  | 1.125475  | -0.160388 |
| C | 2.040015  | -0.146837 | 0.070421  |
| C | 0.993624  | -1.032270 | 0.013223  |
| H | -0.222321 | 0.304331  | 1.213903  |
| H | 1.835514  | 2.032440  | 0.308086  |
| H | 0.939082  | 1.290153  | -1.092543 |
| H | 3.068186  | -0.341880 | 0.353114  |
| H | 0.956750  | -2.087821 | -0.222514 |
| O | -1.283313 | -0.376492 | -0.407057 |
| C | -2.404738 | 0.309493  | 0.136623  |
| H | -2.604177 | -0.028839 | 1.154014  |
| H | -2.222298 | 1.385441  | 0.137969  |
| H | -3.255606 | 0.083935  | -0.498296 |
